# Supplementary material
Source: Research Square preprint supplement (doi:10.21203/rs.3.rs-8980750/v1)
Supplement: Supplementary file 1 [file 506b9350dc9a48d1ed59006f.xlsx]

## Sheet: Sheet 1 - Significant-DEGs
Significant-DEGs
ID	log2FoldChange	pvalue	padj	mVenus Negative	mVenus High	mVenus Negative	mVenus High	mVenus Negative	mVenus High	Gene.name
ENSMUSG00000102039	-23.8436	4.22821e-16	2.21522e-13	309.06	0	0	0	0	0	Gm20788
ENSMUSG00000023885	-12.8339	0.00102019	0.0061155	176.218	0	2237.85	0	0	0	Thbs2
ENSMUSG00000027398	-12.2305	5.62334e-19	4.68705e-16	474.434	0.686007	1681.98	0	935.775	0	Il1b
ENSMUSG00000082658	-12.1865	2.76857e-15	1.08015e-12	2515.85	0	339.269	0	150.06	0.597985	Fau-ps2
ENSMUSG00000102657	-12.1406	6.93269e-16	3.34539e-13	951.578	0	394.525	0	149.128	0	Gm37899
ENSMUSG00000059146	-11.8212	1.96063e-14	6.30738e-12	829.581	0	227.653	0	141.671	0	Ntrk3
ENSMUSG00000058897	-11.6903	8.38069e-15	2.89956e-12	637.096	0	290.644	0	166.836	0	Col25a1
ENSMUSG00000028327	-11.6197	1.39936e-15	5.83185e-13	422.924	0	364.687	0	253.517	0	Stra6l
ENSMUSG00000032087	-11.5483	2.60512e-12	5.69465e-10	680.473	0	269.647	0	41.9421	0	Dscaml1
ENSMUSG00000063646	-11.523	9.08392e-12	1.69971e-09	764.516	0	172.397	0	38.2139	0	Jakmip1
ENSMUSG00000005268	-11.4845	3.18784e-11	5.21924e-09	761.805	0	162.451	0	25.1653	0	Prlr
ENSMUSG00000101532	-11.4154	7.64374e-09	5.01778e-07	775.36	0	128.193	0	0.932047	0	Zbed4-ps1
ENSMUSG00000036103	-11.4135	6.37078e-13	1.51716e-10	368.703	0	461.937	0	71.7676	0	Colec12
ENSMUSG00000060843	-11.3961	5.62408e-13	1.35696e-10	553.054	0	247.545	0	92.2727	0	Ctnna3
ENSMUSG00000059201	-11.3216	5.61693e-11	8.17441e-09	718.428	0	56.3607	0	73.6317	0	Lep
ENSMUSG00000052273	-11.3203	5.23594e-11	7.70798e-09	607.275	0	216.602	0	23.3012	0	Dnah3
ENSMUSG00000050211	-11.2808	6.05845e-10	6.17188e-08	609.986	0	206.656	0	7.45638	0	Pla2g4e
ENSMUSG00000033453	-11.2634	5.22473e-12	1.05281e-09	536.788	0	214.392	0	63.3792	0	Adamts15
ENSMUSG00000109917	-11.2445	6.53052e-12	1.2474e-09	387.68	0	366.897	0	48.4664	0	Gm45671
ENSMUSG00000016346	-11.2206	6.90112e-10	6.91507e-08	642.519	0	137.034	0	11.1846	0	Kcnq2
ENSMUSG00000051860	-11.2092	1.28596e-08	8.02065e-07	577.453	0	205.551	0	0.932047	0	Samd7
ENSMUSG00000060924	-11.2077	9.3467e-11	1.26503e-08	634.385	0	110.511	0	39.146	0	Csmd1
ENSMUSG00000051331	-11.1992	5.73224e-10	5.91601e-08	577.453	0	191.184	0	10.2525	0	Cacna1c
ENSMUSG00000004110	-11.184	3.54468e-11	5.60616e-09	604.564	0	95.0396	0	71.7676	0	Cacna1e
ENSMUSG00000024672	-11.1715	2.03089e-13	5.24513e-11	336.17	0	1031.07	0.524192	117.438	0	Ms4a7
ENSMUSG00000063626	-11.1635	3.20501e-10	3.61496e-08	558.476	0	185.659	0	15.8448	0	Unc5d
ENSMUSG00000026567	-11.1552	1.13519e-09	1.06672e-07	574.742	0	172.397	0	8.38842	0	Adcy10
ENSMUSG00000072663	-11.1271	8.23091e-10	8.0282e-08	539.499	0	191.184	0	10.2525	0	Spef2
ENSMUSG00000024173	-11.1214	1.3595e-12	3.07768e-10	132.841	0	152.505	0.524192	1147.35	0	Tpsab1
ENSMUSG00000047228	-11.112	1.09941e-11	2.01598e-09	506.966	0	132.613	0	94.1368	0	A2ml1
ENSMUSG00000056752	-11.0468	9.44076e-11	1.26503e-08	515.099	0	141.454	0	44.7383	0	Dnah9
ENSMUSG00000066842	-11.0423	9.28385e-10	8.86656e-08	558.476	0	123.772	0	16.7768	0	Hmcn1
ENSMUSG00000046807	-11.0314	2.23439e-10	2.67791e-08	550.343	0	101.67	0	41.9421	0	Lrrc75b
ENSMUSG00000033569	-11.0251	1.14723e-09	1.06786e-07	534.077	0	142.559	0	13.9807	0	Adgrb3
ENSMUSG00000039115	-10.9801	7.51513e-10	7.44891e-08	262.972	0	391.209	0	13.9807	0	Itga9
ENSMUSG00000109245	-10.9755	1.32378e-10	1.66261e-08	450.034	0	179.028	0	38.2139	0	Gm44860
ENSMUSG00000046480	-10.9699	3.6999e-10	4.06258e-08	431.057	0	211.076	0	22.3691	0	Scn4b
ENSMUSG00000089929	-10.9642	3.70596e-14	1.09607e-11	187.062	0.686007	586.814	0	510.762	0	Bcl2a1b
ENSMUSG00000031616	-10.9465	5.36164e-08	2.47588e-06	151.819	0	499.51	0	0.932047	0	Ednra
ENSMUSG00000102860	-10.9211	4.88944e-11	7.34899e-09	376.836	0	207.761	0	57.7869	0	Gm37638
ENSMUSG00000053199	-10.9204	1.82271e-09	1.59919e-07	417.502	0	213.287	0	11.1846	0	Arhgap20
ENSMUSG00000029706	-10.9182	5.13747e-09	3.69435e-07	506.966	0	125.983	0	8.38842	0	Pax4
ENSMUSG00000107405	-10.8866	1.38772e-08	8.53915e-07	455.456	0	167.977	0	3.72819	0	Gm44115
ENSMUSG00000105848	-10.88	5.40083e-08	2.47588e-06	368.703	0	254.176	0	0.932047	0	Gm42683
ENSMUSG00000051682	-10.8787	7.98384e-12	1.50927e-09	284.66	0	222.127	0	116.506	0	Treml4
ENSMUSG00000078190	-10.8587	1.14019e-09	1.06672e-07	412.079	0	184.554	0	18.6409	0	Dnm3os
ENSMUSG00000086733	-10.8572	4.59509e-09	3.42521e-07	447.323	0	158.031	0	9.32047	0	Gm11685
ENSMUSG00000037492	-10.8433	4.10787e-09	3.11265e-07	501.544	0	91.7243	0	15.8448	0	Zmat4
ENSMUSG00000044576	-10.8336	5.14805e-10	5.42527e-08	298.215	0	280.698	0	25.1653	0	Garem2
ENSMUSG00000059460	-10.8254	9.72104e-08	4.02988e-06	460.878	0	139.244	0	0.932047	0	Olfr286
ENSMUSG00000051503	-10.8216	0.00561471	0.0238499	368.703	0	229.863	0	0	0	Gm6583
ENSMUSG00000031966	-10.819	4.16304e-11	6.46929e-09	298.215	0	225.443	0	74.5638	0	Glb1l3
ENSMUSG00000026468	-10.8144	3.52751e-09	2.7525e-07	496.122	0	79.568	0	21.4371	0	Lhx4
ENSMUSG00000106826	-10.8141	4.33347e-11	6.6219e-09	344.303	0	164.662	0	87.6124	0	Gm42583
ENSMUSG00000059842	-10.7842	1.79713e-10	2.19693e-08	403.946	0	95.0396	0	85.7483	0	Zfp341
ENSMUSG00000066747	-10.7766	2.74035e-09	2.25335e-07	425.635	0	138.139	0	17.7089	0	Olfr878
ENSMUSG00000036887	-10.7467	7.00544e-34	2.56918e-30	1203.71	0.686007	5281.33	3.14515	1412.98	0.597985	C1qa
ENSMUSG00000049134	-10.7343	1.5593e-08	9.37474e-07	412.079	0	145.875	0	6.52433	0	Nrap
ENSMUSG00000107041	-10.725	0.00605663	0.0254376	428.346	0	131.508	0	0	0	Gm42735
ENSMUSG00000026442	-10.7248	1.54838e-09	1.38501e-07	341.592	0	196.71	0	22.3691	0	Nfasc
ENSMUSG00000082042	-10.7245	0.00605898	0.0254416	493.411	0	66.3067	0	0	0	Gm15923
ENSMUSG00000106869	-10.724	0.00606118	0.025445	336.17	0	223.233	0	0	0	Gm42473
ENSMUSG00000063919	-10.7146	0.00610593	0.0256094	352.436	0	203.341	0	0	0	Srrm4
ENSMUSG00000068373	-10.7125	1.33423e-09	1.22329e-07	393.102	0	131.508	0	31.6896	0	D430041D05Rik
ENSMUSG00000019817	-10.7071	9.23196e-10	8.86386e-08	149.108	0	368.002	0	35.4178	0	Plagl1
ENSMUSG00000108543	-10.7058	1.69991e-07	6.20942e-06	417.502	0	134.824	0	0.932047	0	Gm44735
ENSMUSG00000063434	-10.6946	8.15857e-09	5.30509e-07	414.79	0	121.562	0	13.0487	0	Sorcs3
ENSMUSG00000097632	-10.6889	2.15645e-11	3.73046e-09	721.139	0	291.749	0	52.1946	0.597985	4930552P12Rik
ENSMUSG00000020695	-10.6788	1.82073e-08	1.05321e-06	170.796	0	364.687	0	6.52433	0	Mrc2
ENSMUSG00000105811	-10.6772	6.47019e-09	4.39422e-07	365.992	0	163.556	0	13.0487	0	Gm42707
ENSMUSG00000017943	-10.6762	1.54621e-09	1.38501e-07	309.06	0	207.761	0	25.1653	0	Gdap1l1
ENSMUSG00000022456	-10.6752	5.74877e-09	4.00818e-07	292.793	0	236.494	0	12.1166	0	Sept3
ENSMUSG00000025815	-10.6693	1.16705e-08	7.37937e-07	452.745	0	69.622	0	17.7089	0	Dhtkd1
ENSMUSG00000034336	-10.6629	4.0489e-10	4.34433e-08	300.926	0	186.764	0	49.3985	0	Ina
ENSMUSG00000079022	-10.6592	1.78999e-09	1.58183e-07	403.946	0	89.514	0	42.8742	0	Col22a1
ENSMUSG00000024713	-10.65	6.25974e-09	4.31522e-07	417.502	0	93.9345	0	21.4371	0	Pcsk5
ENSMUSG00000070995	-10.6431	3.30034e-08	1.68107e-06	417.502	0	106.091	0	6.52433	0	Gm6313
ENSMUSG00000074627	-10.6376	4.48611e-09	3.35763e-07	338.881	0	171.292	0	17.7089	0	Mroh8
ENSMUSG00000044994	-10.6369	1.3947e-07	5.32804e-06	417.502	0	108.301	0	1.86409	0	Olfr1426
ENSMUSG00000064225	-10.6329	7.20641e-09	4.80004e-07	363.281	0	148.085	0	14.9128	0	Paqr9
ENSMUSG00000111504	-10.6294	5.37593e-10	5.60104e-08	336.17	0	129.298	0	59.651	0	Gm48284
ENSMUSG00000026497	-10.6259	1.96481e-07	6.95534e-06	314.482	0	207.761	0	0.932047	0	Mixl1
ENSMUSG00000036905	-10.6171	7.81254e-36	4.77528e-32	1602.23	1.37201	10462.1	1.04838	2996.53	7.17582	C1qb
ENSMUSG00000068117	-10.6085	2.10686e-07	7.35874e-06	298.215	0	217.707	0	0.932047	0	Mei1
ENSMUSG00000048373	-10.6079	4.7437e-09	3.48629e-07	303.637	0	195.605	0	17.7089	0	Fgfbp1
ENSMUSG00000072259	-10.6066	3.57936e-08	1.78896e-06	225.017	0	286.224	0	4.66024	0	Gm5592
ENSMUSG00000094841	-10.6054	3.07979e-10	3.52368e-08	246.705	0	206.656	0	62.4472	0	Gm10610
ENSMUSG00000063887	-10.5971	7.68936e-09	5.01778e-07	368.703	0	127.088	0	17.7089	0	Nlgn1
ENSMUSG00000036545	-10.5881	5.36929e-08	2.47588e-06	298.215	0	207.761	0	3.72819	0	Adamts2
ENSMUSG00000047495	-10.582	1.39569e-08	8.55944e-07	406.657	0	83.9885	0	17.7089	0	Dlgap2
ENSMUSG00000061186	-10.5742	0.00680871	0.0280565	384.969	0	119.352	0	0	0	Sfmbt2
ENSMUSG00000102037	-10.5713	1.35314e-09	1.23446e-07	43.3768	0	316.062	0	142.603	0	Bcl2a1a
ENSMUSG00000059049	-10.5709	7.61481e-09	5.01778e-07	309.06	0	179.028	0	15.8448	0	Frem1
ENSMUSG00000073971	-10.5666	2.20351e-08	1.22311e-06	368.703	0	123.772	0	10.2525	0	Olfr554
ENSMUSG00000090843	-10.5633	1.91583e-08	1.09783e-06	363.281	0	127.088	0	11.1846	0	Heatr4
ENSMUSG00000070695	-10.5597	4.53296e-07	1.3739e-05	417.502	0	81.7782	0	0.932047	0	Cntnap5a
ENSMUSG00000108053	-10.5417	1.71676e-08	1.00576e-06	341.592	0	140.349	0	12.1166	0	Gm43890
ENSMUSG00000079157	-10.5346	6.86516e-09	4.61122e-07	384.969	0	70.7271	0	36.3498	0	Fam155a
ENSMUSG00000026587	-10.5279	1.22413e-07	4.80641e-06	341.592	0	144.77	0	2.79614	0	Astn1
ENSMUSG00000075370	-10.527	0.00706099	0.0289529	284.66	0	203.341	0	0	0	Igll1
ENSMUSG00000024529	-10.5214	1.03445e-06	2.70594e-05	32.5326	0	451.991	0	0.932047	0	Lox
ENSMUSG00000108035	-10.5171	4.46712e-07	1.35618e-05	374.125	0	110.511	0	0.932047	0	Gm44021
ENSMUSG00000102950	-10.5138	1.26199e-08	7.89796e-07	374.125	0	88.4089	0	22.3691	0	Gm37018
ENSMUSG00000057182	-10.5135	2.45028e-08	1.32149e-06	376.836	0	93.9345	0	13.9807	0	Scn3a
ENSMUSG00000031872	-10.5069	2.46062e-07	8.43372e-06	368.703	0	111.616	0	1.86409	0	Bean1
ENSMUSG00000104735	-10.5026	2.81669e-09	2.27896e-07	344.303	0	58.5709	0	78.292	0	C130075A20Rik
ENSMUSG00000027401	-10.4952	1.14857e-07	4.58851e-06	349.725	0	124.878	0	3.72819	0	Tgm3
ENSMUSG00000093839	-10.4883	0.00727393	0.0296932	376.836	0	98.3549	0	0	0	Olfr462
ENSMUSG00000042256	-10.4501	1.17728e-07	4.68281e-06	368.703	0	89.514	0	5.59228	0	Ptchd4
ENSMUSG00000020411	-10.439	5.31589e-07	1.55219e-05	306.349	0	152.505	0	0.932047	0	Nipal4
ENSMUSG00000037736	-10.4314	3.39235e-08	1.71365e-06	368.703	0	70.7271	0	18.6409	0	Limch1
ENSMUSG00000071713	-10.4302	3.50414e-35	1.60639e-31	1051.89	2.05802	3110.89	0	1754.11	2.39194	Csf2rb
ENSMUSG00000042429	-10.43	1.215e-07	4.78231e-06	238.572	0	214.392	0	3.72819	0	Adora1
ENSMUSG00000073927	-10.4263	5.21977e-07	1.53028e-05	265.683	0	188.974	0	0.932047	0	Olfr652
ENSMUSG00000091455	-10.4215	2.36992e-08	1.29022e-06	284.66	0	155.821	0	13.9807	0	Otogl
ENSMUSG00000097638	-10.4174	1.06758e-07	4.35995e-06	279.238	0	169.082	0	4.66024	0	Carlr
ENSMUSG00000073457	-10.4152	1.2267e-07	4.80641e-06	344.303	0	102.775	0	5.59228	0	Smok2b
ENSMUSG00000027297	-10.4144	1.11316e-07	4.49605e-06	330.748	0	116.037	0	5.59228	0	Ltk
ENSMUSG00000056427	-10.4126	2.8654e-07	9.45014e-06	206.04	0	243.125	0	1.86409	0	Slit3
ENSMUSG00000024064	-10.4076	9.20074e-07	2.44375e-05	374.125	0	75.1476	0	0.932047	0	Galnt14
ENSMUSG00000086496	-10.4058	1.47639e-07	5.58196e-06	276.527	0	169.082	0	3.72819	0	Gm14204
ENSMUSG00000024565	-10.4019	1.38089e-09	1.25354e-07	612.697	0.686007	245.335	0	14.9128	0	Sall3
ENSMUSG00000020264	-10.4009	4.01626e-06	7.87123e-05	262.972	0	184.554	0	0	0	Slc36a2
ENSMUSG00000025789	-10.3978	6.36051e-07	1.79394e-05	290.082	0	155.821	0	0.932047	0	St8sia2
ENSMUSG00000073043	-10.3969	4.5737e-06	8.70903e-05	317.193	0	129.298	0	0	0	Atoh1
ENSMUSG00000028339	-10.3964	9.5273e-07	2.52095e-05	78.6204	0	365.792	0	0.932047	0	Col15a1
ENSMUSG00000056162	-10.3902	2.66085e-07	8.98564e-06	360.569	0	80.6731	0	3.72819	0	Cndp1
ENSMUSG00000067571	-10.3896	5.37868e-09	3.77889e-07	252.128	0	156.926	0	35.4178	0	Ms4a15
ENSMUSG00000031853	-10.3889	2.44035e-08	1.32149e-06	306.349	0	120.457	0	17.7089	0	Map3k21
ENSMUSG00000021313	-10.3851	4.75308e-09	3.48629e-07	303.637	0	71.8322	0	68.0394	0	Ryr2
ENSMUSG00000044749	-10.3811	1.7071e-08	1.00562e-06	298.215	0	121.562	0	22.3691	0	Abca6
ENSMUSG00000052516	-10.3788	2.65731e-08	1.40164e-06	352.436	0	58.5709	0	30.7576	0	Robo2
ENSMUSG00000063142	-10.3743	2.60005e-07	8.84546e-06	295.504	0	141.454	0	2.79614	0	Kcnma1
ENSMUSG00000030317	-10.3716	1.95746e-07	6.94274e-06	298.215	0	137.034	0	3.72819	0	Timp4
ENSMUSG00000033740	-10.3687	4.03424e-09	3.06954e-07	219.595	0	41.9942	0	176.157	0	St18
ENSMUSG00000028238	-10.3637	5.04371e-09	3.65559e-07	37.9547	0	200.025	0	196.662	0	Atp6v0d2
ENSMUSG00000086548	-10.3599	4.84506e-06	9.14972e-05	254.839	0	180.133	0	0	0	Gm12972
ENSMUSG00000061576	-10.3593	5.4698e-08	2.50124e-06	311.771	0	111.616	0	12.1166	0	Dpp6
ENSMUSG00000004814	-10.3566	2.11763e-17	1.25261e-14	151.819	0.686007	3263.39	2.09677	342.061	0	Ccl24
ENSMUSG00000030345	-10.3509	1.71185e-07	6.22308e-06	295.504	0	132.613	0	4.66024	0	Dyrk4
ENSMUSG00000042401	-10.3464	1.66553e-07	6.11393e-06	319.904	0	106.091	0	5.59228	0	Crtac1
ENSMUSG00000003418	-10.3442	5.29644e-06	9.84912e-05	265.683	0	164.662	0	0	0	St8sia6
ENSMUSG00000109541	-10.3414	5.29183e-06	9.84912e-05	254.839	0	174.608	0	0	0	Gm6112
ENSMUSG00000030911	-10.3411	3.17091e-07	1.0273e-05	295.504	0	131.508	0	2.79614	0	Zp2
ENSMUSG00000110463	-10.338	3.16904e-08	1.62321e-06	235.861	0	177.923	0	14.9128	0	Gm35998
ENSMUSG00000050296	-10.3341	1.26368e-07	4.93024e-06	363.281	0	51.9402	0	13.0487	0	Abca12
ENSMUSG00000111241	-10.3329	1.43898e-08	8.79553e-07	225.017	0	177.923	0	24.2332	0	Gm19121
ENSMUSG00000006344	-10.3327	1.28413e-09	1.18327e-07	195.196	0	92.8294	0	138.875	0	Ggt5
ENSMUSG00000041674	-10.3324	4.02297e-10	4.34433e-08	588.298	0.686007	206.656	0	37.2819	0	BC006965
ENSMUSG00000107153	-10.3218	1.93847e-08	1.10391e-06	208.751	0	20.9971	0	193.866	0	Gm38404
ENSMUSG00000110881	-10.3211	6.49798e-09	4.39681e-07	235.861	0	146.98	0	41.0101	0	Olfr897-ps1
ENSMUSG00000074591	-10.3137	6.2178e-07	1.76222e-05	317.193	0	102.775	0	1.86409	0	Ankub1
ENSMUSG00000104291	-10.3078	6.46418e-09	4.39422e-07	235.861	0	140.349	0	43.8062	0	A130071D04Rik
ENSMUSG00000042251	-10.307	7.95407e-06	0.000136695	333.459	0	86.1987	0	0	0	Pm20d1
ENSMUSG00000108750	-10.3057	6.52284e-06	0.000116238	276.527	0	142.559	0	0	0	Gm44750
ENSMUSG00000055214	-10.3	4.40384e-07	1.34365e-05	374.125	0	37.5738	0	6.52433	0	Pld5
ENSMUSG00000025478	-10.296	2.48502e-07	8.50146e-06	298.215	0	113.826	0	4.66024	0	Dpysl4
ENSMUSG00000087115	-10.2951	6.48953e-06	0.00011587	241.283	0	174.608	0	0	0	Pcsk2os2
ENSMUSG00000103688	-10.2907	5.37922e-08	2.47588e-06	290.082	0	109.406	0	15.8448	0	Gm6321
ENSMUSG00000029134	-10.2891	1.84142e-06	4.28503e-05	387.68	0	25.4176	0	1.86409	0	Plb1
ENSMUSG00000097079	-10.289	8.10797e-06	0.000138725	317.193	0	97.2498	0	0	0	Gm26604
ENSMUSG00000102067	-10.2864	3.60915e-08	1.7984e-06	281.949	0	111.616	0	20.505	0	Gm29230
ENSMUSG00000026141	-10.2786	2.16262e-07	7.51061e-06	290.082	0	116.037	0	5.59228	0	Col19a1
ENSMUSG00000047810	-10.2774	2.7721e-07	9.2554e-06	187.062	0	219.917	0	3.72819	0	Ccdc88b
ENSMUSG00000020395	-10.2766	2.8255e-07	9.36911e-06	298.215	0	108.301	0	4.66024	0	Itk
ENSMUSG00000049571	-10.2763	1.40706e-07	5.3564e-06	347.014	0	48.6249	0	15.8448	0	Cfap46
ENSMUSG00000109503	-10.2759	4.88464e-07	1.46836e-05	300.926	0	107.196	0	2.79614	0	Gm44786
ENSMUSG00000029923	-10.2754	1.1905e-06	3.0194e-05	279.238	0	130.403	0	0.932047	0	Rab19
ENSMUSG00000085599	-10.2688	2.44866e-08	1.32149e-06	206.04	0	180.133	0	22.3691	0	Gm13449
ENSMUSG00000111209	-10.2643	2.56111e-10	2.99127e-08	360.569	0.686007	391.209	0	41.0101	0	Gm7529
ENSMUSG00000086150	-10.2643	4.24309e-09	3.18875e-07	214.173	0	127.088	0	66.1753	0	Bach2os
ENSMUSG00000017652	-10.2585	7.56902e-06	0.000131184	189.773	0	215.497	0	0	0	Cd40
ENSMUSG00000059089	-10.2583	3.37901e-10	3.7552e-08	233.15	0	511.667	0.524192	43.8062	0	Fcgr4
ENSMUSG00000109606	-10.2557	7.8687e-06	0.000135364	246.705	0	158.031	0	0	0	Gm45537
ENSMUSG00000078632	-10.2513	1.38646e-06	3.40342e-05	284.66	0	118.247	0	0.932047	0	Lrrc37a
ENSMUSG00000076573	-10.2501	2.11031e-08	1.18584e-06	284.66	0	77.3578	0	41.9421	0	Igkv1-35
ENSMUSG00000074971	-10.2499	1.71281e-05	0.000250661	29.8215	0	372.423	0	0	0	Fibin
ENSMUSG00000012520	-10.2415	8.90049e-06	0.000149049	273.816	0	127.088	0	0	0	Phox2b
ENSMUSG00000063430	-10.2415	1.15053e-06	2.95481e-05	357.858	0	40.8891	0	2.79614	0	Wscd2
ENSMUSG00000022039	-10.232	3.38e-08	1.71213e-06	281.949	0	86.1987	0	30.7576	0	Adam2
ENSMUSG00000111193	-10.2319	5.78863e-07	1.66373e-05	319.904	0	75.1476	0	3.72819	0	Gm35288
ENSMUSG00000073598	-10.2317	6.84553e-10	6.89706e-08	542.21	0	196.71	0	37.2819	0.597985	1700066B19Rik
ENSMUSG00000085546	-10.222	7.05402e-07	1.9658e-05	303.637	0	89.514	0	2.79614	0	Gm14252
ENSMUSG00000084992	-10.2186	3.34253e-08	1.69784e-06	265.683	0	100.565	0	28.8935	0	Gm13842
ENSMUSG00000108418	-10.2183	1.36266e-05	0.000207535	336.17	0	58.5709	0	0	0	Gm44627
ENSMUSG00000105973	-10.2177	3.68597e-09	2.85188e-07	189.773	0	103.88	0	100.661	0	Gm42881
ENSMUSG00000108848	-10.2125	1.11145e-07	4.49605e-06	262.972	0	118.247	0	12.1166	0	4933430N04Rik
ENSMUSG00000015396	-10.2124	5.40443e-26	9.91011e-23	306.349	1.37201	4771.87	3.66934	1744.79	0.597985	Cd83
ENSMUSG00000059043	-10.2056	2.30934e-08	1.26407e-06	271.105	0	49.73	0	70.8356	0	Olfr15
ENSMUSG00000009628	-10.2051	2.03871e-06	4.62098e-05	306.349	0	83.9885	0	0.932047	0	Tex15
ENSMUSG00000087444	-10.2037	4.23534e-08	2.04917e-06	235.861	0	132.613	0	22.3691	0	Gm5475
ENSMUSG00000030237	-10.2003	8.04241e-08	3.48798e-06	241.283	0	133.718	0	14.9128	0	Slco1a4
ENSMUSG00000051527	-10.1991	4.23214e-09	3.18875e-07	493.411	0	251.965	0	13.0487	0.597985	Usp29
ENSMUSG00000031553	-10.1985	2.77977e-07	9.2554e-06	319.904	0	59.676	0	10.2525	0	Adam3
ENSMUSG00000079580	-10.196	1.15796e-05	0.000182733	284.66	0	103.88	0	0	0	Tmem217
ENSMUSG00000038112	-10.1919	1.41699e-06	3.46445e-05	344.303	0	40.8891	0	2.79614	0	AW551984
ENSMUSG00000048038	-10.1909	2.18189e-06	4.84961e-05	303.637	0	82.8834	0	0.932047	0	Ccdc187
ENSMUSG00000109908	-10.1906	8.30259e-08	3.55712e-06	200.618	0	172.397	0	13.9807	0	NA
ENSMUSG00000064036	-10.1896	1.82463e-07	6.5476e-06	303.637	0	70.7271	0	13.0487	0	Mro
ENSMUSG00000102692	-10.1815	1.92552e-07	6.85596e-06	322.615	0	19.892	0	42.8742	0	Dchs2
ENSMUSG00000108448	-10.1752	2.5279e-07	8.62807e-06	257.55	0	118.247	0	7.45638	0	Gm21269
ENSMUSG00000033427	-10.1722	4.98302e-07	1.48093e-05	328.037	0	46.4147	0	8.38842	0	Upb1
ENSMUSG00000056258	-10.1692	1.47703e-05	0.00022286	306.349	0	75.1476	0	0	0	Kcnq3
ENSMUSG00000110437	-10.1655	1.83902e-06	4.28503e-05	216.884	0	162.451	0	0.932047	0	Gm45876
ENSMUSG00000106448	-10.1654	1.81519e-08	1.05321e-06	233.15	0	97.2498	0	50.3305	0	Gm43486
ENSMUSG00000104211	-10.1645	1.72301e-08	1.00621e-06	623.541	0.686007	107.196	0	10.2525	0	Gm37985
ENSMUSG00000040264	-10.1644	2.69809e-08	1.41762e-06	78.6204	0	251.965	0	48.4664	0	Gbp2b
ENSMUSG00000046613	-10.1637	2.14722e-08	1.19676e-06	241.283	0	48.6249	0	90.4086	0	Vwa5b2
ENSMUSG00000108681	-10.1627	1.26489e-05	0.000194746	260.261	0	119.352	0	0	0	Gm17825
ENSMUSG00000070873	-10.1627	3.7015e-08	1.83941e-06	56.932	0	267.437	0	54.0587	0	Lilra5
ENSMUSG00000027500	-10.1626	5.56835e-08	2.53997e-06	252.128	0	102.775	0	25.1653	0	Stmn2
ENSMUSG00000049928	-10.1499	6.01462e-08	2.72324e-06	279.238	0	58.5709	0	39.146	0	Glp2r
ENSMUSG00000031871	-10.1497	1.33928e-07	5.16637e-06	252.128	0	110.511	0	13.9807	0	Cdh5
ENSMUSG00000025892	-10.149	2.23138e-07	7.71931e-06	252.128	0	114.932	0	9.32047	0	Gria4
ENSMUSG00000111232	-10.1483	2.11469e-08	1.18584e-06	235.861	0	87.3038	0	53.1267	0	AC113291.1
ENSMUSG00000083510	-10.1401	1.31655e-05	0.000201684	227.728	0	145.875	0	0	0	Gm13478
ENSMUSG00000074771	-10.1392	3.96216e-08	1.93745e-06	260.261	0	66.3067	0	47.5344	0	Ankef1
ENSMUSG00000024033	-10.1333	1.23395e-06	3.11665e-05	233.15	0	137.034	0	1.86409	0	Rsph1
ENSMUSG00000110682	-10.1292	3.54646e-11	5.60616e-09	382.258	0	173.503	0.524192	166.836	0	A530010L16Rik
ENSMUSG00000017969	-10.1287	3.90316e-07	1.21939e-05	113.864	0	249.755	0	6.52433	0	Ptgis
ENSMUSG00000098439	-10.1248	1.21046e-07	4.78231e-06	265.683	0	85.0936	0	19.573	0	Hm629797
ENSMUSG00000031253	-10.124	2.12496e-05	0.00029654	51.5099	0	317.167	0	0	0	Srpx2
ENSMUSG00000045875	-10.1219	6.6338e-07	1.8657e-05	363.281	0.686007	354.741	0	0	0	Adra1a
ENSMUSG00000024757	-10.117	2.16092e-05	0.000300644	317.193	0	50.8351	0	0	0	Slc22a19
ENSMUSG00000108145	-10.1165	1.88287e-05	0.000269315	298.215	0	69.622	0	0	0	Gm38811
ENSMUSG00000109723	-10.1131	3.31177e-06	6.71026e-05	295.504	0	70.7271	0	0.932047	0	Gm5347
ENSMUSG00000092536	-10.1124	1.45383e-05	0.000220139	200.618	0	165.767	0	0	0	Gm20501
ENSMUSG00000005611	-10.1107	3.06211e-07	1.00089e-05	279.238	0	11.0511	0	76.4279	0	Mrvi1
ENSMUSG00000037451	-10.1056	1.57936e-07	5.8625e-06	276.527	0	68.5169	0	20.505	0	Slc22a20
ENSMUSG00000024211	-10.1055	5.0851e-06	9.51577e-05	347.014	0	16.5767	0	1.86409	0	Grm8
ENSMUSG00000104388	-10.1044	9.52883e-08	3.97114e-06	206.04	0	18.7869	0	139.807	0	Gm37033
ENSMUSG00000025576	-10.1023	1.62779e-06	3.89162e-05	328.037	0	32.0482	0	4.66024	0	Rbfox3
ENSMUSG00000022262	-10.099	7.68613e-09	5.01778e-07	577.453	0	109.406	0.524192	21.4371	0	Dnah5
ENSMUSG00000030307	-10.0968	3.55564e-07	1.1222e-05	225.017	0	130.403	0	7.45638	0	Slc6a11
ENSMUSG00000047592	-10.0956	1.77558e-05	0.000257585	262.972	0	99.46	0	0	0	Nxpe5
ENSMUSG00000020377	-10.0955	2.92618e-08	1.52004e-06	103.02	0	211.076	0	47.5344	0	Ltc4s
ENSMUSG00000061171	-10.0943	8.67478e-08	3.6652e-06	260.261	0	70.7271	0	31.6896	0	Slc38a11
ENSMUSG00000043020	-10.0876	1.51904e-07	5.68462e-06	273.816	0	62.9914	0	24.2332	0	Wdr63
ENSMUSG00000109612	-10.0867	1.85561e-05	0.000267293	262.972	0	97.2498	0	0	0	Gm45253
ENSMUSG00000104698	-10.0859	3.08127e-06	6.3556e-05	257.55	0	101.67	0	0.932047	0	Gm42602
ENSMUSG00000102983	-10.084	1.67387e-06	3.98621e-05	243.994	0	113.826	0	1.86409	0	Gm38320
ENSMUSG00000032297	-10.0813	7.98325e-07	2.17841e-05	211.462	0	143.664	0	3.72819	0	Celf6
ENSMUSG00000024673	-10.0808	1.59497e-08	9.49575e-07	181.64	0	107.196	0	69.9035	0	Ms4a1
ENSMUSG00000060332	-10.0776	1.26915e-06	3.17496e-05	254.839	0	100.565	0	2.79614	0	Tmc2
ENSMUSG00000031535	-10.0755	1.74607e-05	0.000254109	216.884	0	140.349	0	0	0	Dkk4
ENSMUSG00000107103	-10.0711	1.06463e-07	4.35761e-06	189.773	0	146.98	0	19.573	0	Gm43164
ENSMUSG00000039543	-10.069	9.92361e-08	4.08003e-06	181.64	0	153.61	0	20.505	0	Cfap70
ENSMUSG00000089696	-10.0689	1.87747e-05	0.000269173	238.572	0	117.142	0	0	0	Gm4778
ENSMUSG00000064201	-10.0686	1.81782e-07	6.53595e-06	225.017	0	116.037	0	14.9128	0	Krt2
ENSMUSG00000084909	-10.0656	4.38796e-08	2.11726e-06	211.462	0	102.775	0	41.0101	0	4930528G23Rik
ENSMUSG00000034912	-10.063	1.73418e-06	4.10849e-05	303.637	0	47.5198	0	3.72819	0	Mdga2
ENSMUSG00000103686	-10.06	1.86693e-05	0.00026808	214.173	0	139.244	0	0	0	Gm37073
ENSMUSG00000048647	-10.0578	3.05414e-06	6.31446e-05	200.618	0	151.4	0	0.932047	0	Exd1
ENSMUSG00000051036	-10.0563	2.32422e-06	5.10409e-05	273.816	0	77.3578	0	1.86409	0	Ttc24
ENSMUSG00000084947	-10.056	1.81625e-08	1.05321e-06	466.3	0.686007	212.181	0	8.38842	0	Gm15594
ENSMUSG00000038763	-10.0556	3.76814e-09	2.90321e-07	463.589	0	200.025	0	23.3012	0.597985	Alpk3
ENSMUSG00000020061	-10.0555	3.47842e-06	6.98618e-05	246.705	0	104.986	0	0.932047	0	Mybpc1
ENSMUSG00000061414	-10.0533	8.29785e-08	3.55712e-06	249.416	0	45.3096	0	57.7869	0	Cracr2a
ENSMUSG00000109194	-10.0528	1.11584e-07	4.49694e-06	233.15	0	93.9345	0	25.1653	0	Gm44570
ENSMUSG00000070498	-10.052	2.05459e-06	4.63407e-05	249.416	0	100.565	0	1.86409	0	Tmem132b
ENSMUSG00000057246	-10.0502	7.70723e-06	0.000133328	325.326	0	25.4176	0	0.932047	0	BC051142
ENSMUSG00000110638	-10.043	5.91011e-07	1.6907e-05	230.439	0	112.721	0	6.52433	0	Gm45887
ENSMUSG00000034206	-10.0424	8.50082e-08	3.61669e-06	243.994	0	62.9914	0	42.8742	0	Polq
ENSMUSG00000106962	-10.0406	3.86296e-05	0.000479263	322.615	0	26.5227	0	0	0	Gm43633
ENSMUSG00000043036	-10.0397	3.41299e-09	2.67453e-07	490.7	0.686007	159.136	0	29.8255	0	Ccdc63
ENSMUSG00000111673	-10.0384	2.84279e-07	9.39249e-06	252.128	0	81.7782	0	14.9128	0	Gm29724
ENSMUSG00000002341	-10.0376	4.00205e-08	1.95174e-06	211.462	0	77.3578	0	59.651	0	Ncan
ENSMUSG00000102618	-10.0338	2.05154e-06	4.63289e-05	225.017	0	120.457	0	1.86409	0	Gm37848
ENSMUSG00000021702	-10.0317	2.05995e-05	0.000289673	176.218	0	170.187	0	0	0	Thbs4
ENSMUSG00000110557	-10.0303	2.77467e-05	0.000367358	284.66	0	61.8862	0	0	0	Gm5159
ENSMUSG00000000706	-10.0296	2.78111e-07	9.2554e-06	262.972	0	65.2016	0	18.6409	0	Btn1a1
ENSMUSG00000027070	-10.0292	9.31951e-11	1.26503e-08	1065.44	1.37201	225.443	0	32.6216	0	Lrp2
ENSMUSG00000027955	-10.0284	4.87926e-13	1.19295e-10	683.184	1.37201	512.772	0	107.185	0	Fam198b
ENSMUSG00000003476	-10.0281	3.68957e-06	7.326e-05	222.306	0	122.667	0	0.932047	0	Crhr2
ENSMUSG00000104147	-10.0264	1.29453e-06	3.21828e-05	287.371	0	53.0454	0	5.59228	0	Gm37142
ENSMUSG00000002944	-10.0262	4.42225e-08	2.11726e-06	113.864	0	45.3096	0	185.477	0	Cd36
ENSMUSG00000022449	-10.0222	1.3204e-07	5.12918e-06	252.128	0	39.784	0	53.1267	0	Adamts20
ENSMUSG00000041670	-10.0214	6.83366e-07	1.91897e-05	252.128	0	85.0936	0	7.45638	0	Rims1
ENSMUSG00000078157	-10.0195	2.89524e-07	9.53142e-06	276.527	0	35.3636	0	32.6216	0	4931440F15Rik
ENSMUSG00000104808	-10.0191	2.34322e-05	0.000319461	233.15	0	110.511	0	0	0	Gm42619
ENSMUSG00000041460	-10.0185	3.28357e-07	1.05633e-05	235.861	0	95.0396	0	13.0487	0	Cacna2d4
ENSMUSG00000058806	-10.0183	3.91689e-08	1.92558e-06	197.907	0	86.1987	0	59.651	0	Col13a1
ENSMUSG00000059562	-10.0183	3.94228e-06	7.74808e-05	227.728	0	114.932	0	0.932047	0	Ccdc154
ENSMUSG00000106030	-10.0174	3.08938e-06	6.36312e-05	317.193	0	22.1022	0	4.66024	0	Gm43611
ENSMUSG00000103561	-10.0171	4.12294e-06	8.01722e-05	238.572	0	103.88	0	0.932047	0	Gm38069
ENSMUSG00000010505	-10.0171	1.98759e-06	4.56152e-05	265.683	0	75.1476	0	2.79614	0	Myt1
ENSMUSG00000104276	-10.0148	4.21455e-07	1.29668e-05	241.283	0	90.6191	0	11.1846	0	Gm37866
ENSMUSG00000039419	-10.014	2.35355e-07	8.097e-06	227.728	0	98.3549	0	16.7768	0	Cntnap2
ENSMUSG00000054966	-10.0128	3.42494e-05	0.000437958	298.215	0	44.2045	0	0	0	Lmntd1
ENSMUSG00000110895	-10.0128	3.42494e-05	0.000437958	298.215	0	44.2045	0	0	0	Gm48822
ENSMUSG00000069072	-10.0107	4.44723e-08	2.12367e-06	203.329	0	64.0965	0	74.5638	0	Slc7a14
ENSMUSG00000075270	-10.0083	2.01255e-06	4.58437e-05	260.261	0	78.4629	0	2.79614	0	Pde11a
ENSMUSG00000067156	-10.0083	5.38108e-08	2.47588e-06	211.462	0	68.5169	0	61.5151	0	Gm7337
ENSMUSG00000067279	-10.0039	3.4338e-05	0.000438784	292.793	0	47.5198	0	0	0	Ppp1r3c
ENSMUSG00000086349	-10.0029	2.72715e-05	0.00036185	254.839	0	85.0936	0	0	0	Gm13497
ENSMUSG00000081044	-10.0022	1.11889e-07	4.49938e-06	238.572	0	54.1505	0	47.5344	0	AU015836
ENSMUSG00000015314	-9.99948	2.04422e-06	4.62205e-05	254.839	0	81.7782	0	2.79614	0	Slamf6
ENSMUSG00000027016	-9.99921	1.70413e-07	6.21246e-06	252.128	0	40.8891	0	46.6024	0	Zfp385b
ENSMUSG00000038651	-9.99705	8.07999e-08	3.49347e-06	222.306	0	66.3067	0	50.3305	0	Sycp2l
ENSMUSG00000036896	-9.99459	1.31098e-36	1.20197e-32	1222.68	4.80205	7102.55	4.19353	2037.45	1.19597	C1qc
ENSMUSG00000092397	-9.99431	1.50699e-07	5.6735e-06	195.196	0	120.457	0	22.3691	0	C130080G10Rik
ENSMUSG00000106775	-9.99394	3.14997e-05	0.000409072	273.816	0	64.0965	0	0	0	C130093G08Rik
ENSMUSG00000069925	-9.98977	1.48389e-07	5.5988e-06	238.572	0	35.3636	0	63.3792	0	4932416K20Rik
ENSMUSG00000070332	-9.9892	4.55945e-07	1.37965e-05	168.085	0	159.136	0	9.32047	0	Trim80
ENSMUSG00000040136	-9.98813	3.51192e-05	0.000444738	284.66	0	51.9402	0	0	0	Abcc8
ENSMUSG00000052920	-9.98656	3.62494e-06	7.2268e-05	273.816	0	60.7811	0	1.86409	0	Prkg1
ENSMUSG00000108088	-9.98493	6.23058e-06	0.000111791	276.527	0	58.5709	0	0.932047	0	Gm44229
ENSMUSG00000103594	-9.97898	5.59817e-07	1.62427e-05	243.994	0	79.568	0	11.1846	0	A430034D21Rik
ENSMUSG00000024207	-9.97852	7.8086e-06	0.000134827	292.793	0	40.8891	0	0.932047	0	Acsbg2
ENSMUSG00000049252	-9.97465	1.32725e-07	5.13457e-06	208.751	0	95.0396	0	29.8255	0	Lrp1b
ENSMUSG00000000805	-9.97402	3.30732e-07	1.06211e-05	203.329	0	116.037	0	13.9807	0	Car4
ENSMUSG00000075256	-9.97379	2.02673e-06	4.61094e-05	227.728	0	102.775	0	2.79614	0	Cerkl
ENSMUSG00000111565	-9.97207	1.27256e-06	3.17914e-05	227.728	0	100.565	0	4.66024	0	Gm34481
ENSMUSG00000004948	-9.97071	1.05511e-06	2.74433e-05	246.705	0	79.568	0	6.52433	0	Zp3
ENSMUSG00000101639	-9.97053	2.73954e-07	9.16695e-06	252.128	0	51.9402	0	28.8935	0	Gm8597
ENSMUSG00000055994	-9.96641	1.09976e-06	2.84032e-05	227.728	0	98.3549	0	5.59228	0	Nod2
ENSMUSG00000051452	-9.96582	3.13134e-05	0.000407195	243.994	0	87.3038	0	0	0	Gm11437
ENSMUSG00000104189	-9.96505	6.29406e-10	6.37648e-08	406.657	0	161.346	0	77.3599	0.597985	Gm37822
ENSMUSG00000078490	-9.96338	1.66722e-09	1.48407e-07	412.079	0	186.764	0.524192	45.6703	0	Cfap74
ENSMUSG00000061165	-9.96148	3.50239e-05	0.000444144	262.972	0	67.4118	0	0	0	Olfr160
ENSMUSG00000053675	-9.9552	3.25718e-09	2.57444e-07	452.745	0	149.19	0	39.146	0.597985	Tgm5
ENSMUSG00000043456	-9.95111	1.40797e-07	5.3564e-06	225.017	0	53.0454	0	50.3305	0	Zfp536
ENSMUSG00000042102	-9.95079	1.81313e-06	4.25562e-05	230.439	0	93.9345	0	3.72819	0	Dmgdh
ENSMUSG00000102785	-9.94989	2.61457e-06	5.5813e-05	246.705	0	78.4629	0	2.79614	0	Gm2447
ENSMUSG00000104082	-9.94636	3.44306e-05	0.000439356	243.994	0	82.8834	0	0	0	Gm7115
ENSMUSG00000066129	-9.94448	2.54349e-06	5.44859e-05	265.683	0	57.4658	0	3.72819	0	Kndc1
ENSMUSG00000022229	-9.94201	4.25378e-06	8.21069e-05	260.261	0	64.0965	0	1.86409	0	Atp12a
ENSMUSG00000023992	-9.93836	3.09382e-10	3.52368e-08	116.575	0.686007	362.477	0	151.924	0	Trem2
ENSMUSG00000110660	-9.93777	3.22268e-05	0.000416451	208.751	0	116.037	0	0	0	Gm5362
ENSMUSG00000066113	-9.93212	7.06032e-09	4.725e-07	458.167	0	144.77	0	27.9614	0.597985	Adamtsl1
ENSMUSG00000026582	-9.93109	5.8514e-07	1.67914e-05	252.128	0	54.1505	0	17.7089	0	Sele
ENSMUSG00000067597	-9.92813	5.77503e-10	5.91601e-08	382.258	0	159.136	0	87.6124	0.597985	Dgat2l6
ENSMUSG00000044811	-9.92702	1.19412e-12	2.77172e-10	208.751	1.37201	826.623	0	178.021	0	Cd300c2
ENSMUSG00000074652	-9.92208	1.16869e-06	2.98057e-05	165.374	0	150.295	0	5.59228	0	Myh7b
ENSMUSG00000086219	-9.92142	1.48318e-06	3.59471e-05	281.949	0	23.2073	0	16.7768	0	Srrm4os
ENSMUSG00000097072	-9.91719	1.24867e-06	3.1495e-05	249.416	0	62.9914	0	8.38842	0	Foxl2os
ENSMUSG00000097736	-9.91676	3.64139e-05	0.000456406	219.595	0	100.565	0	0	0	9530059O14Rik
ENSMUSG00000065968	-9.91339	7.0759e-05	0.000771408	300.926	0	18.7869	0	0	0	Ifitm7
ENSMUSG00000111611	-9.91261	9.07017e-07	2.42449e-05	168.085	0	143.664	0	7.45638	0	Olfr157
ENSMUSG00000101564	-9.91141	3.46809e-05	0.000441628	176.218	0	142.559	0	0	0	Gm5703
ENSMUSG00000109419	-9.91081	4.06819e-06	7.95292e-05	227.728	0	89.514	0	1.86409	0	Gm45163
ENSMUSG00000051980	-9.90945	7.86921e-06	0.000135364	249.416	0	68.5169	0	0.932047	0	Casr
ENSMUSG00000106220	-9.90917	4.75235e-07	1.43329e-05	233.15	0	66.3067	0	19.573	0	Gm43288
ENSMUSG00000107619	-9.90827	3.76157e-06	7.44077e-05	206.04	0	110.511	0	1.86409	0	Gm32479
ENSMUSG00000021090	-9.9066	2.13754e-07	7.43758e-06	173.507	0	119.352	0	25.1653	0	Lrrc9
ENSMUSG00000100431	-9.90606	3.77235e-06	7.45405e-05	203.329	0	112.721	0	1.86409	0	4930558N11Rik
ENSMUSG00000063715	-9.90333	3.97736e-05	0.000489482	227.728	0	89.514	0	0	0	Olfr816
ENSMUSG00000072722	-9.90268	4.60255e-05	0.000548032	257.55	0	59.676	0	0	0	Gm6588
ENSMUSG00000104157	-9.90044	4.5783e-05	0.000546206	254.839	0	61.8862	0	0	0	Gm38101
ENSMUSG00000056328	-9.90018	6.91064e-08	3.06829e-06	162.663	0	83.9885	0	69.9035	0	Myh1
ENSMUSG00000036872	-9.89895	4.93834e-07	1.47298e-05	246.705	0	37.5738	0	32.6216	0	Abcc12
ENSMUSG00000019232	-9.89763	5.8548e-05	0.000659861	281.949	0	34.2585	0	0	0	Etnppl
ENSMUSG00000033847	-9.89551	3.49596e-07	1.11039e-05	309.06	0	303.906	0	0.932047	0.597985	Pla2g4c
ENSMUSG00000110427	-9.894	4.23386e-07	1.30044e-05	235.861	0	51.9402	0	27.9614	0	4933406B17Rik
ENSMUSG00000034391	-9.89213	4.01783e-05	0.000493469	214.173	0	100.565	0	0	0	Fbxo15
ENSMUSG00000027350	-9.88872	1.54877e-08	9.34204e-07	390.391	0	205.551	0.524192	15.8448	0	Chgb
ENSMUSG00000090199	-9.88803	4.80068e-05	0.000566372	252.128	0	61.8862	0	0	0	Gm16029
ENSMUSG00000086291	-9.88525	1.43303e-06	3.499e-05	241.283	0	64.0965	0	8.38842	0	Gm15513
ENSMUSG00000037578	-9.88377	1.4124e-06	3.46149e-05	246.705	0	57.4658	0	9.32047	0	Pkd2l1
ENSMUSG00000055026	-9.88099	3.95424e-05	0.00048729	176.218	0	135.929	0	0	0	Gabrg3
ENSMUSG00000102808	-9.88061	7.28966e-06	0.000127184	271.105	0	39.784	0	1.86409	0	5430420F09Rik
ENSMUSG00000068950	-9.87992	1.5608e-07	5.81715e-06	181.64	0	90.6191	0	40.078	0	Olfr338
ENSMUSG00000031561	-9.87809	5.79658e-12	1.14292e-09	767.227	1.37201	328.218	0	84.8163	0	Tenm3
ENSMUSG00000040086	-9.87805	7.74036e-07	2.12477e-05	252.128	0	27.6278	0	32.6216	0	Tnni3k
ENSMUSG00000097520	-9.87779	2.20474e-06	4.89448e-05	431.057	0	175.713	0.524192	0	0	4930488L21Rik
ENSMUSG00000052861	-9.87738	1.43063e-10	1.77253e-08	816.026	0	206.656	1.04838	49.3985	0	Dnah6
ENSMUSG00000030518	-9.87679	2.63229e-07	8.90559e-06	216.884	0	47.5198	0	47.5344	0	Fam189a1
ENSMUSG00000109907	-9.87378	5.71408e-05	0.000646225	265.683	0	45.3096	0	0	0	Gm45321
ENSMUSG00000104905	-9.87104	4.50046e-05	0.000539731	219.595	0	90.6191	0	0	0	Gm43718
ENSMUSG00000026609	-9.8708	9.36467e-07	2.4815e-05	544.921	0.686007	58.5709	0	0.932047	0	Ush2a
ENSMUSG00000106750	-9.87002	1.16428e-06	2.97345e-05	260.261	0	24.3125	0	26.0973	0	Gm43151
ENSMUSG00000051985	-9.86981	2.084e-06	4.68313e-05	206.04	0	99.46	0	4.66024	0	Igfn1
ENSMUSG00000032380	-9.86916	2.15217e-06	4.81272e-05	211.462	0	93.9345	0	4.66024	0	Dapk2
ENSMUSG00000105153	-9.86805	8.00855e-07	2.18206e-05	206.04	0	91.7243	0	12.1166	0	Gm3143
ENSMUSG00000106547	-9.86669	6.67809e-09	4.50206e-07	376.836	0.686007	197.815	0	27.9614	0	B230303O12Rik
ENSMUSG00000029307	-9.86638	4.96964e-05	0.000580066	238.572	0	70.7271	0	0	0	Dmp1
ENSMUSG00000027376	-9.86537	2.73816e-06	5.79788e-05	265.683	0	36.4687	0	7.45638	0	Prom2
ENSMUSG00000100044	-9.86461	5.51862e-05	0.000629321	254.839	0	54.1505	0	0	0	Gm9553
ENSMUSG00000038173	-9.86424	5.479e-06	0.000100872	233.15	0	74.0425	0	1.86409	0	Enpp6
ENSMUSG00000031142	-9.8618	2.7268e-07	9.141e-06	208.751	0	60.7811	0	39.146	0	Cacna1f
ENSMUSG00000101650	-9.86141	4.37593e-05	0.000529996	189.773	0	118.247	0	0	0	Gm6820
ENSMUSG00000061701	-9.85662	2.13593e-07	7.43758e-06	197.907	0	62.9914	0	46.6024	0	Fbxw20
ENSMUSG00000097470	-9.85438	4.66911e-05	0.000555188	206.04	0	100.565	0	0	0	Gm26587
ENSMUSG00000102459	-9.85298	4.4184e-05	0.000532327	149.108	0	156.926	0	0	0	Gm38352
ENSMUSG00000081873	-9.85176	1.73978e-06	4.11642e-05	211.462	0	88.4089	0	6.52433	0	Gm15197
ENSMUSG00000009633	-9.85125	1.02022e-06	2.67253e-05	18.9773	0	44.2045	0	241.4	0	G0s2
ENSMUSG00000032845	-9.85109	1.81485e-06	4.25562e-05	216.884	0	82.8834	0	6.52433	0	Alpk2
ENSMUSG00000036123	-9.84736	3.14049e-06	6.44152e-05	241.283	0	59.676	0	4.66024	0	Slc9a3
ENSMUSG00000100776	-9.84267	3.29629e-06	6.68812e-05	222.306	0	78.4629	0	3.72819	0	Gm18254
ENSMUSG00000034310	-9.84219	5.80732e-09	4.03367e-07	368.703	0	191.184	0.524192	32.6216	0	Tmem132d
ENSMUSG00000047155	-9.8413	5.36137e-06	9.9125e-05	206.04	0	96.1447	0	1.86409	0	Cyp4x1
ENSMUSG00000109562	-9.84114	1.56474e-07	5.82002e-06	170.796	0	82.8834	0	50.3305	0	Gm45178
ENSMUSG00000073768	-9.84105	6.33167e-07	1.79151e-05	222.306	0	59.676	0	22.3691	0	Olfr1330
ENSMUSG00000097336	-9.84027	2.48553e-06	5.35919e-05	241.283	0	56.3607	0	6.52433	0	Fendrr
ENSMUSG00000102973	-9.8366	4.72817e-05	0.00056008	154.53	0	148.085	0	0	0	E430014B02Rik
ENSMUSG00000032796	-9.83584	5.28862e-09	3.75882e-07	376.836	0.686007	176.818	0	36.3498	0	Lama1
ENSMUSG00000020490	-9.83583	4.92867e-07	1.47298e-05	216.884	0	57.4658	0	28.8935	0	Btnl10
ENSMUSG00000070568	-9.83378	7.92298e-05	0.000848952	273.816	0	28.7329	0	0	0	Slc6a21
ENSMUSG00000099839	-9.83306	7.16161e-07	1.98672e-05	233.15	0	39.784	0	29.8255	0	Gm29374
ENSMUSG00000022053	-9.83202	1.84087e-06	4.28503e-05	200.618	0	95.0396	0	6.52433	0	Ebf2
ENSMUSG00000049538	-9.83177	4.8728e-05	0.000571673	173.507	0	128.193	0	0	0	Adamts16
ENSMUSG00000104470	-9.83175	5.19447e-07	1.52646e-05	197.907	0	82.8834	0	21.4371	0	Gm38207
ENSMUSG00000070942	-9.83014	4.10853e-06	8.00617e-05	238.572	0	59.676	0	3.72819	0	Il1rl2
ENSMUSG00000098177	-9.82824	6.02794e-07	1.71904e-05	176.218	0	108.301	0	16.7768	0	Gm4823
ENSMUSG00000034919	-9.82803	2.98866e-09	2.38274e-07	352.436	0.686007	186.764	0	47.5344	0	Ttc22
ENSMUSG00000102614	-9.82678	3.63014e-06	7.22756e-05	222.306	0	75.1476	0	3.72819	0	Gm37843
ENSMUSG00000032303	-9.82603	4.79763e-07	1.44457e-05	108.442	0	171.292	0	20.505	0	Chrna3
ENSMUSG00000109372	-9.82452	1.05604e-05	0.000168976	222.306	0	77.3578	0	0.932047	0	Gm19410
ENSMUSG00000071553	-9.82283	1.02257e-05	0.000165629	214.173	0	85.0936	0	0.932047	0	Cpa2
ENSMUSG00000037129	-9.82244	9.54062e-06	0.000157535	195.196	0	103.88	0	0.932047	0	Tmprss13
ENSMUSG00000034910	-9.82056	9.14843e-08	3.83897e-06	113.864	0	81.7782	0	103.457	0	Pygo1
ENSMUSG00000019368	-9.82023	8.8274e-05	0.000928675	279.238	0	0	0	20.505	0	Sec14l4
ENSMUSG00000082749	-9.81961	2.99231e-07	9.81573e-06	187.062	0	76.2527	0	36.3498	0	Rpl9-ps2
ENSMUSG00000021071	-9.81868	2.06953e-07	7.28385e-06	393.102	0	186.764	0.524192	2.79614	0	Trim9
ENSMUSG00000082303	-9.8172	5.14587e-05	0.000596836	138.263	0	160.241	0	0	0	Gm13633
ENSMUSG00000052769	-9.81567	3.55184e-07	1.1222e-05	173.507	0	97.2498	0	27.9614	0	Gm9889
ENSMUSG00000075045	-9.81562	5.44394e-05	0.000625082	197.907	0	100.565	0	0	0	Gm4981
ENSMUSG00000042501	-9.81542	6.74173e-05	0.000742949	246.705	0	51.9402	0	0	0	Cpa6
ENSMUSG00000033854	-9.81539	3.11068e-06	6.38751e-05	121.997	0	172.397	0	3.72819	0	Kcnk10
ENSMUSG00000024749	-9.81401	1.05947e-06	2.75147e-05	238.572	0	27.6278	0	32.6216	0	Tmc1
ENSMUSG00000075042	-9.80907	1.29212e-06	3.21828e-05	235.861	0	44.2045	0	17.7089	0	4930431P03Rik
ENSMUSG00000097448	-9.80712	6.20586e-05	0.000693883	225.017	0	71.8322	0	0	0	Platr22
ENSMUSG00000035435	-9.80703	2.91164e-09	2.33147e-07	398.524	0	85.0936	0.524192	95.0688	0	Abca17
ENSMUSG00000061489	-9.80133	5.64588e-06	0.000103736	262.972	0	27.6278	0	5.59228	0	Olfr525
ENSMUSG00000104912	-9.79926	2.59608e-05	0.000349518	279.238	0	15.4716	0	0.932047	0	Gm43023
ENSMUSG00000022652	-9.7972	1.11226e-05	0.000177044	203.329	0	90.6191	0	0.932047	0	Morc1
ENSMUSG00000072720	-9.79622	7.61733e-05	0.000821736	249.416	0	45.3096	0	0	0	Myo18b
ENSMUSG00000022805	-9.79611	1.48578e-06	3.59471e-05	230.439	0	49.73	0	14.9128	0	Maats1
ENSMUSG00000090061	-9.79381	1.37702e-05	0.000209547	268.394	0	24.3125	0	1.86409	0	Nwd2
ENSMUSG00000073403	-9.79329	1.42688e-07	5.41711e-06	135.552	0	93.9345	0	64.3112	0	Gm10499
ENSMUSG00000086893	-9.78601	6.69415e-05	0.000739017	219.595	0	72.9374	0	0	0	Gm11365
ENSMUSG00000029797	-9.78228	3.23746e-06	6.58883e-05	216.884	0	69.622	0	5.59228	0	Sspo
ENSMUSG00000098959	-9.78221	7.51814e-07	2.06825e-05	206.04	0	61.8862	0	24.2332	0	Gm27230
ENSMUSG00000108293	-9.77723	2.67115e-06	5.69545e-05	206.04	0	78.4629	0	6.52433	0	Pla2g4c-ps
ENSMUSG00000042078	-9.77373	1.57654e-05	0.000233892	238.572	0	50.8351	0	0.932047	0	Svop
ENSMUSG00000067103	-9.77328	2.96001e-07	9.7272e-06	173.507	0	66.3067	0	50.3305	0	AY702103
ENSMUSG00000052403	-9.77079	9.30498e-06	0.000154644	230.439	0	57.4658	0	1.86409	0	Fcnaos
ENSMUSG00000097356	-9.76692	4.1599e-07	1.28202e-05	165.374	0	91.7243	0	31.6896	0	Gm26774
ENSMUSG00000032691	-9.76313	5.62244e-07	1.62579e-05	81.3315	0	177.923	0	27.9614	0	Nlrp3
ENSMUSG00000103256	-9.76186	3.5748e-06	7.15624e-05	252.128	0	16.5767	0	19.573	0	Gm37647
ENSMUSG00000085180	-9.75762	2.22137e-05	0.000305576	257.55	0	28.7329	0	0.932047	0	AI838599
ENSMUSG00000103378	-9.7559	7.61821e-05	0.000821736	216.884	0	69.622	0	0	0	Gm37176
ENSMUSG00000033633	-9.75465	3.45614e-06	6.94903e-05	249.416	0	18.7869	0	18.6409	0	Clec18a
ENSMUSG00000059279	-9.75145	6.7298e-05	0.000742505	138.263	0	146.98	0	0	0	Olfr224
ENSMUSG00000058287	-9.74729	1.17305e-05	0.000184479	254.839	0	27.6278	0	2.79614	0	Gm12253
ENSMUSG00000102420	-9.74676	5.20898e-09	3.72627e-07	387.68	0	92.8294	0	74.5638	0.597985	Gm37464
ENSMUSG00000021508	-9.74595	9.08938e-06	0.00015152	230.439	0	2277.63	0	61.5151	2.98993	Cxcl14
ENSMUSG00000085329	-9.74079	2.69094e-06	5.72181e-05	165.374	0	111.616	0	6.52433	0	2810404F17Rik
ENSMUSG00000039529	-9.73557	6.41297e-08	2.88222e-06	287.371	0.686007	253.071	0	9.32047	0	Atp8b1
ENSMUSG00000104816	-9.73514	2.62715e-05	0.000352317	257.55	0	24.3125	0	0.932047	0	Gm43473
ENSMUSG00000030144	-9.73493	2.71236e-07	9.10925e-06	56.932	0	141.454	0	82.9522	0	Clec4d
ENSMUSG00000050840	-9.73392	1.8095e-06	4.25394e-05	195.196	0	75.1476	0	12.1166	0	Cdh20
ENSMUSG00000058153	-9.73261	2.54193e-05	0.000342731	254.839	0	26.5227	0	0.932047	0	Sez6l
ENSMUSG00000107178	-9.7301	1.99767e-06	4.56604e-05	227.728	0	30.9431	0	23.3012	0	Gm42531
ENSMUSG00000055088	-9.72986	4.04247e-06	7.91108e-05	176.218	0	100.565	0	4.66024	0	Olfr354
ENSMUSG00000065987	-9.72886	3.90898e-06	7.69088e-05	162.663	0	113.826	0	4.66024	0	Cd209b
ENSMUSG00000009734	-9.72869	1.71913e-06	4.0781e-05	214.173	0	49.73	0	17.7089	0	Pou6f2
ENSMUSG00000025014	-9.72757	2.1675e-06	4.83111e-05	178.929	0	92.8294	0	9.32047	0	Dntt
ENSMUSG00000085391	-9.72363	7.57711e-05	0.000818266	157.241	0	122.667	0	0	0	Gm16150
ENSMUSG00000041703	-9.72234	5.93645e-07	1.69559e-05	176.218	0	68.5169	0	35.4178	0	Zic5
ENSMUSG00000103129	-9.71927	7.66728e-05	0.000825454	146.397	0	132.613	0	0	0	Gm37393
ENSMUSG00000104830	-9.71817	4.73534e-09	3.48629e-07	363.281	0	107.196	0	73.6317	0.597985	5830487J09Rik
ENSMUSG00000024397	-9.71487	6.38868e-15	2.29704e-12	162.663	0	1395.76	2.09677	326.216	0	Aif1
ENSMUSG00000060429	-9.71394	9.377e-06	0.000155467	225.017	0	50.8351	0	2.79614	0	Sntb1
ENSMUSG00000104798	-9.71333	5.81907e-06	0.000105857	243.994	0	25.4176	0	9.32047	0	Gm20121
ENSMUSG00000023577	-9.71187	8.0475e-05	0.000859948	113.864	0	163.556	0	0	0	Iqcf3
ENSMUSG00000033578	-9.71158	5.30897e-06	9.84912e-05	219.595	0	53.0454	0	5.59228	0	Tmem35a
ENSMUSG00000090919	-9.71072	9.87809e-06	0.000161439	227.728	0	47.5198	0	2.79614	0	Pabpc4l
ENSMUSG00000020826	-9.7097	5.08559e-06	9.51577e-05	197.907	0	75.1476	0	4.66024	0	Nos2
ENSMUSG00000094763	-9.70907	5.11021e-07	1.50895e-05	170.796	0	50.8351	0	55.9228	0	Gm1647
ENSMUSG00000102331	-9.7072	0.000118039	0.00116121	243.994	0	33.1533	0	0	0	Gm19938
ENSMUSG00000099757	-9.70653	3.55047e-07	1.1222e-05	119.286	0	111.616	0	45.6703	0	BE692007
ENSMUSG00000084816	-9.70411	2.09175e-06	4.69478e-05	211.462	0	48.6249	0	16.7768	0	Platr29
ENSMUSG00000079186	-9.70334	8.17819e-05	0.000871374	135.552	0	140.349	0	0	0	Gzmc
ENSMUSG00000096345	-9.70228	8.79003e-05	0.000926219	189.773	0	86.1987	0	0	0	Esp16
ENSMUSG00000021098	-9.70161	9.19219e-07	2.44375e-05	184.351	0	62.9914	0	28.8935	0	4930447C04Rik
ENSMUSG00000066750	-9.70076	3.49347e-05	0.000443627	257.55	0	17.6818	0	0.932047	0	Olfr876
ENSMUSG00000106710	-9.69724	1.17048e-05	0.000184391	206.04	0	67.4118	0	1.86409	0	Gm43166
ENSMUSG00000105618	-9.6951	9.41062e-05	0.000977691	200.618	0	74.0425	0	0	0	Gm42916
ENSMUSG00000110542	-9.69393	3.03711e-06	6.29995e-05	214.173	0	48.6249	0	12.1166	0	Gm39139
ENSMUSG00000000617	-9.68932	1.98929e-05	0.000281246	208.751	0	64.0965	0	0.932047	0	Grm6
ENSMUSG00000005339	-9.68762	1.31919e-06	3.26011e-05	43.3768	0	32.0482	0	196.662	0	Fcer1a
ENSMUSG00000104476	-9.68725	1.03261e-05	0.000166388	108.442	0	162.451	0	1.86409	0	Gm38211
ENSMUSG00000042258	-9.6867	1.68083e-05	0.000246966	162.663	0	109.406	0	0.932047	0	Isl1
ENSMUSG00000070342	-9.6859	2.20641e-05	0.000304431	249.416	0	22.1022	0	1.86409	0	Gm10287
ENSMUSG00000099370	-9.68517	8.96686e-06	0.00014975	200.618	0	69.622	0	2.79614	0	Platr10
ENSMUSG00000026163	-9.68084	2.29395e-06	5.0685e-05	181.64	0	78.4629	0	12.1166	0	Sphkap
ENSMUSG00000111658	-9.67985	3.61771e-06	7.22636e-05	195.196	0	68.5169	0	8.38842	0	B930092H01Rik
ENSMUSG00000024922	-9.67736	3.67606e-07	1.15622e-05	132.841	0	74.0425	0	64.3112	0	Ovol1
ENSMUSG00000075249	-9.67699	1.07927e-05	0.000172543	249.416	0	12.1562	0	10.2525	0	Fsip2
ENSMUSG00000073386	-9.67585	3.22428e-06	6.5693e-05	127.419	0	135.929	0	7.45638	0	9830107B12Rik
ENSMUSG00000032725	-9.67526	9.18965e-05	0.000959728	149.108	0	121.562	0	0	0	Folr2
ENSMUSG00000093628	-9.67454	8.16196e-06	0.000139484	170.796	0	97.2498	0	2.79614	0	Gm20616
ENSMUSG00000105289	-9.674	9.0298e-07	2.42075e-05	151.819	0	92.8294	0	26.0973	0	Gm43483
ENSMUSG00000055523	-9.67277	1.06085e-06	2.75147e-05	187.062	0	40.8891	0	42.8742	0	Gucy2g
ENSMUSG00000052504	-9.67197	1.75616e-05	0.000255375	140.975	0	128.193	0	0.932047	0	Epha3
ENSMUSG00000063823	-9.67196	6.90118e-07	1.93497e-05	168.085	0	53.0454	0	49.3985	0	Olfr532
ENSMUSG00000021256	-9.67187	9.90846e-07	2.61051e-05	176.218	0	30.9431	0	63.3792	0	Vash1
ENSMUSG00000075122	-9.67097	2.61668e-09	2.181e-07	100.309	0	122.667	0	301.051	0.597985	Cd80
ENSMUSG00000106598	-9.6708	0.00012597	0.00122024	230.439	0	39.784	0	0	0	Gm43532
ENSMUSG00000111342	-9.67003	1.22929e-05	0.000190384	189.773	0	78.4629	0	1.86409	0	4933404K13Rik
ENSMUSG00000030159	-9.66723	2.35714e-06	5.14425e-05	173.507	0	12.1562	0	83.8842	0	Clec1b
ENSMUSG00000049336	-9.66711	5.63889e-07	1.62579e-05	447.323	0	74.0425	0.524192	3.72819	0	Tenm2
ENSMUSG00000078962	-9.6666	7.94181e-07	2.17357e-05	157.241	0	79.568	0	32.6216	0	4932414J04Rik
ENSMUSG00000048485	-9.6662	3.12371e-07	1.01921e-05	97.5978	0	92.8294	0	78.292	0	Zbtb8b
ENSMUSG00000026365	-9.66577	1.36571e-15	5.82397e-13	379.547	1.37201	958.132	0	167.768	0.597985	Cfh
ENSMUSG00000104263	-9.66565	0.000107488	0.00108057	200.618	0	68.5169	0	0	0	9430062P05Rik
ENSMUSG00000045087	-9.66542	2.2729e-06	5.03359e-05	165.374	0	91.7243	0	12.1166	0	S1pr5
ENSMUSG00000071984	-9.6641	8.86495e-08	3.73693e-06	371.414	0	140.349	0	12.1166	0.597985	Fndc1
ENSMUSG00000038242	-9.66217	9.3803e-08	3.92709e-06	414.79	0.686007	92.8294	0	15.8448	0	Aox4
ENSMUSG00000099890	-9.66163	0.000113762	0.0011276	208.751	0	59.676	0	0	0	Gm28262
ENSMUSG00000057135	-9.66071	1.24835e-05	0.000192523	86.7536	0	179.028	0	1.86409	0	Scimp
ENSMUSG00000071235	-9.65822	0.000142123	0.00133305	235.861	0	32.0482	0	0	0	Vrtn
ENSMUSG00000022875	-9.65811	3.04944e-06	6.31446e-05	195.196	0	60.7811	0	12.1166	0	Kng1
ENSMUSG00000042179	-9.65725	3.62581e-06	7.2268e-05	216.884	0	35.3636	0	15.8448	0	Pnliprp1
ENSMUSG00000028354	-9.65638	2.41728e-05	0.000327853	211.462	0	55.2556	0	0.932047	0	Fmn2
ENSMUSG00000036298	-9.65611	1.99953e-06	4.56604e-05	197.907	0	47.5198	0	22.3691	0	Slc2a13
ENSMUSG00000101397	-9.65557	0.000140137	0.00131982	233.15	0	34.2585	0	0	0	Mug-ps1
ENSMUSG00000058019	-9.65534	3.10197e-06	6.37677e-05	208.751	0	43.0993	0	15.8448	0	Ces5a
ENSMUSG00000020067	-9.65449	5.79244e-06	0.000105582	230.439	0	23.2073	0	13.9807	0	Mypn
ENSMUSG00000104687	-9.65426	4.56233e-05	0.000544658	252.128	0	14.3664	0	0.932047	0	Gm42899
ENSMUSG00000029595	-9.6523	0.000120625	0.00117968	211.462	0	55.2556	0	0	0	Lhx5
ENSMUSG00000103883	-9.6515	2.81737e-06	5.91777e-05	208.751	0	38.6789	0	19.573	0	Gm37010
ENSMUSG00000079330	-9.64947	7.24262e-07	2.00616e-05	159.952	0	54.1505	0	52.1946	0	Lemd1
ENSMUSG00000086594	-9.64928	0.000104231	0.00105622	165.374	0	100.565	0	0	0	Nudt12os
ENSMUSG00000097317	-9.64872	3.37015e-06	6.79851e-05	197.907	0	56.3607	0	12.1166	0	Gm17281
ENSMUSG00000109559	-9.64826	0.000129597	0.00124681	219.595	0	46.4147	0	0	0	Gm34280
ENSMUSG00000105975	-9.64825	0.000167828	0.00151674	243.994	0	22.1022	0	0	0	Gm42609
ENSMUSG00000051180	-9.64806	7.84106e-06	0.000135133	181.64	0	80.6731	0	3.72819	0	Olfr522
ENSMUSG00000039092	-9.64344	1.13771e-05	0.000179691	200.618	0	61.8862	0	2.79614	0	Sptlc3
ENSMUSG00000041287	-9.64284	1.12428e-06	2.89957e-05	168.085	0	66.3067	0	30.7576	0	Sox15
ENSMUSG00000109125	-9.64197	2.43481e-06	5.27744e-05	189.773	0	58.5709	0	16.7768	0	Gm45159
ENSMUSG00000102139	-9.64062	1.15672e-06	2.95827e-05	154.53	0	83.9885	0	26.0973	0	Gm37109
ENSMUSG00000084960	-9.64005	1.0145e-10	1.32877e-08	599.142	0	239.809	1.04838	73.6317	0	B430010I23Rik
ENSMUSG00000020624	-9.63708	2.71327e-06	5.75182e-05	206.04	0	33.1533	0	25.1653	0	4933434M16Rik
ENSMUSG00000017211	-9.63424	1.13916e-06	2.92971e-05	173.507	0	39.784	0	50.3305	0	Gsdma2
ENSMUSG00000026077	-9.63149	1.63677e-06	3.90801e-05	173.507	0	66.3067	0	23.3012	0	Npas2
ENSMUSG00000022523	-9.63116	7.69435e-06	0.000133231	151.819	0	107.196	0	3.72819	0	Fgf12
ENSMUSG00000079183	-9.6306	2.33396e-06	5.11211e-05	130.13	0	119.352	0	13.0487	0	C030005K15Rik
ENSMUSG00000098204	-9.62952	1.12076e-05	0.000177935	235.861	0	18.7869	0	8.38842	0	Gm26984
ENSMUSG00000001943	-9.62819	1.92222e-06	4.44562e-05	181.64	0	58.5709	0	22.3691	0	Vsig2
ENSMUSG00000105942	-9.62679	2.04388e-06	4.62205e-05	173.507	0	18.7869	0	69.9035	0	Gm43175
ENSMUSG00000040649	-9.6261	2.85113e-05	0.000376253	211.462	0	49.73	0	0.932047	0	Rimklb
ENSMUSG00000064329	-9.62588	1.65574e-08	9.79397e-07	287.371	0	188.974	0	33.5537	0.597985	Scn1a
ENSMUSG00000032878	-9.62522	2.35933e-06	5.14425e-05	197.907	0	35.3636	0	28.8935	0	Ccdc85a
ENSMUSG00000087094	-9.62396	0.000146219	0.00136727	219.595	0	41.9942	0	0	0	Gm13093
ENSMUSG00000038663	-9.62364	5.36249e-06	9.9125e-05	219.595	0	26.5227	0	15.8448	0	Fsd2
ENSMUSG00000028109	-9.62201	4.5576e-06	8.68739e-05	178.929	0	74.0425	0	8.38842	0	Hormad1
ENSMUSG00000031344	-9.62172	1.58638e-05	0.000234817	189.773	0	69.622	0	1.86409	0	Gabrq
ENSMUSG00000102376	-9.62078	2.33623e-06	5.11211e-05	189.773	0	22.1022	0	49.3985	0	Gm37975
ENSMUSG00000085464	-9.61828	1.00212e-06	2.63642e-05	130.13	0	99.46	0	30.7576	0	Gm16208
ENSMUSG00000086607	-9.61412	1.6779e-06	3.98825e-05	132.841	0	107.196	0	19.573	0	4930511M06Rik
ENSMUSG00000106467	-9.61345	1.2139e-06	3.07447e-05	113.864	0	119.352	0	26.0973	0	Gm43395
ENSMUSG00000084989	-9.6134	9.63285e-06	0.000158277	203.329	0	51.9402	0	4.66024	0	Crocc2
ENSMUSG00000110607	-9.6121	1.69931e-05	0.000249083	192.484	0	65.2016	0	1.86409	0	Gm45843
ENSMUSG00000025189	-9.61051	0.000127737	0.0012334	181.64	0	77.3578	0	0	0	Cnnm1
ENSMUSG00000062393	-9.6091	5.97849e-06	0.000108007	189.773	0	61.8862	0	7.45638	0	Dgkk
ENSMUSG00000099974	-9.60885	5.91892e-09	4.09567e-07	70.4873	0	290.644	0.524192	140.739	0	Bcl2a1d
ENSMUSG00000025461	-9.60753	0.000171853	0.00154323	227.728	0	30.9431	0	0	0	Cd163l1
ENSMUSG00000033192	-9.60652	7.2958e-15	2.57275e-12	338.881	1.37201	965.867	0	142.603	0.597985	Lpcat2
ENSMUSG00000064294	-9.60619	4.55205e-08	2.16808e-06	365.992	0.686007	110.511	0	27.0294	0	Aox3
ENSMUSG00000030111	-9.60298	2.09005e-05	0.000292559	227.728	0	27.6278	0	2.79614	0	A2m
ENSMUSG00000070690	-9.60011	0.000137634	0.00130361	189.773	0	67.4118	0	0	0	5830473C10Rik
ENSMUSG00000108434	-9.59898	1.04536e-06	2.72672e-05	154.53	0	54.1505	0	48.4664	0	Gm45768
ENSMUSG00000111767	-9.59431	4.64377e-06	8.82412e-05	170.796	0	76.2527	0	9.32047	0	4930546K05Rik
ENSMUSG00000072419	-9.58686	4.15343e-06	8.0424e-05	178.929	0	64.0965	0	12.1166	0	Dppa2
ENSMUSG00000026834	-9.58455	2.37118e-08	1.29022e-06	352.436	0.686007	96.1447	0	47.5344	0	Acvr1c
ENSMUSG00000022155	-9.58214	1.74236e-06	4.11722e-05	159.952	0	66.3067	0	27.9614	0	Mroh2b
ENSMUSG00000062760	-9.57967	2.41173e-06	5.2336e-05	420.213	0	72.9374	0.524192	0.932047	0	1810041L15Rik
ENSMUSG00000100830	-9.57872	0.000139057	0.001311	162.663	0	90.6191	0	0	0	Gm28441
ENSMUSG00000025400	-9.57692	1.85857e-05	0.000267509	176.218	0	75.1476	0	1.86409	0	Tac2
ENSMUSG00000032048	-9.5744	8.87267e-06	0.000148719	184.351	0	62.9914	0	5.59228	0	4930510E17Rik
ENSMUSG00000009281	-9.57407	3.43663e-05	0.00043884	54.221	0	196.71	0	0.932047	0	Rarres2
ENSMUSG00000053044	-9.57352	1.31217e-06	3.25593e-05	130.13	0	90.6191	0	31.6896	0	Cd8b1
ENSMUSG00000107148	-9.57279	3.31941e-05	0.000427144	227.728	0	23.2073	0	1.86409	0	Gm42888
ENSMUSG00000032503	-9.57274	5.23614e-07	1.53134e-05	349.725	0.686007	138.139	0	3.72819	0	Arpp21
ENSMUSG00000019146	-9.57218	0.000153906	0.00141961	187.062	0	65.2016	0	0	0	Cacng2
ENSMUSG00000082079	-9.57201	4.26461e-05	0.000517539	219.595	0	32.0482	0	0.932047	0	Dnmt3c
ENSMUSG00000110246	-9.57108	3.33672e-06	6.75335e-05	189.773	0	37.5738	0	25.1653	0	C130073E24Rik
ENSMUSG00000084861	-9.5705	8.83153e-06	0.000148436	154.53	0	92.8294	0	4.66024	0	1700095J07Rik
ENSMUSG00000027894	-9.56945	7.17053e-06	0.000125821	168.085	0	77.3578	0	6.52433	0	Slc6a17
ENSMUSG00000086049	-9.56929	6.41047e-09	4.38615e-07	940.734	0	423.258	0	1.86409	1.79396	Gm12735
ENSMUSG00000085844	-9.5692	2.86753e-06	6.01623e-05	431.057	0	58.5709	0	0.932047	0.597985	Gm11690
ENSMUSG00000090173	-9.56835	1.48595e-06	3.59471e-05	154.53	0	37.5738	0	59.651	0	Fbxw10
ENSMUSG00000085541	-9.56831	1.9115e-05	0.00027256	227.728	0	18.7869	0	5.59228	0	Gm16010
ENSMUSG00000054236	-9.56694	1.29525e-06	3.21828e-05	149.108	0	58.5709	0	43.8062	0	Olfr481
ENSMUSG00000104696	-9.56576	4.03351e-05	0.000495063	233.15	0	16.5767	0	1.86409	0	Gm42946
ENSMUSG00000038305	-9.56485	1.21273e-05	0.000188688	206.04	0	39.784	0	5.59228	0	Spats2l
ENSMUSG00000027347	-9.56414	6.2849e-12	1.21312e-09	539.499	1.37201	152.505	0	253.517	0	Rasgrp1
ENSMUSG00000089663	-9.56271	3.5273e-06	7.07659e-05	189.773	0	34.2585	0	27.0294	0	Gm15651
ENSMUSG00000013338	-9.56244	9.65801e-06	0.000158549	165.374	0	80.6731	0	4.66024	0	Fer1l4
ENSMUSG00000032572	-9.56099	2.17082e-06	4.83111e-05	124.708	0	104.986	0	20.505	0	Col6a4
ENSMUSG00000064801	-9.56076	3.99871e-05	0.000491652	208.751	0	40.8891	0	0.932047	0	Gm24035
ENSMUSG00000000948	-9.56018	0.000158727	0.00145238	181.64	0	68.5169	0	0	0	Gm38393
ENSMUSG00000106395	-9.55972	2.17093e-06	4.83111e-05	170.796	0	44.2045	0	35.4178	0	Gm42439
ENSMUSG00000111236	-9.55741	4.68949e-06	8.89021e-05	187.062	0	15.4716	0	47.5344	0	Gm31614
ENSMUSG00000028360	-9.55651	2.47878e-08	1.32905e-06	349.725	0.686007	70.7271	0	66.1753	0	Slc44a5
ENSMUSG00000094200	-9.55436	3.40319e-05	0.000436394	222.306	0	25.4176	0	1.86409	0	Olfr237-ps1
ENSMUSG00000109256	-9.55433	3.35891e-06	6.79078e-05	157.241	0	76.2527	0	15.8448	0	Gm44681
ENSMUSG00000021492	-9.55361	3.73282e-05	0.00046659	235.861	0	9.946	0	3.72819	0	F12
ENSMUSG00000033122	-9.55272	2.29886e-06	5.07271e-05	170.796	0	36.4687	0	41.9421	0	Hsd17b3
ENSMUSG00000104509	-9.55133	9.86485e-06	0.000161439	211.462	0	26.5227	0	11.1846	0	Gm33994
ENSMUSG00000025716	-9.55072	6.0502e-06	0.000109088	178.929	0	59.676	0	10.2525	0	Myo3a
ENSMUSG00000106184	-9.55017	1.04209e-06	2.72204e-05	116.575	0	85.0936	0	46.6024	0	Gm43463
ENSMUSG00000101389	-9.54965	1.2177e-15	5.44608e-13	271.105	2.74403	1326.13	0	315.964	0	Ms4a4a
ENSMUSG00000030278	-9.54903	1.31578e-05	0.000201684	176.218	0	68.5169	0	3.72819	0	Cidec
ENSMUSG00000104436	-9.5485	3.11939e-08	1.60675e-06	271.105	0	182.343	0	29.8255	0.597985	Gm37423
ENSMUSG00000021478	-9.54755	8.45461e-06	0.000143681	192.484	0	47.5198	0	8.38842	0	Drd1
ENSMUSG00000039913	-9.54614	2.6848e-06	5.71791e-05	406.657	0	75.1476	0.524192	0.932047	0	Pak7
ENSMUSG00000071550	-9.54445	2.21828e-05	0.00030538	222.306	0	20.9971	0	4.66024	0	Cfap44
ENSMUSG00000029685	-9.54415	3.31465e-05	0.000426831	168.085	0	78.4629	0	0.932047	0	Asb15
ENSMUSG00000014198	-9.54409	1.93343e-05	0.000275045	195.196	0	49.73	0	2.79614	0	Zfp385c
ENSMUSG00000029348	-9.54314	0.000162149	0.00147706	165.374	0	81.7782	0	0	0	Asphd2
ENSMUSG00000037424	-9.53924	0.000156904	0.00144146	124.708	0	121.562	0	0	0	Taar9
ENSMUSG00000053024	-9.53918	2.30729e-06	5.07864e-05	154.53	0	65.2016	0	27.0294	0	Cntn2
ENSMUSG00000103089	-9.53915	3.07826e-06	6.3556e-05	176.218	0	40.8891	0	29.8255	0	Gm38118
ENSMUSG00000046093	-9.53886	1.26516e-06	3.16948e-05	132.841	0	65.2016	0	48.4664	0	Hpcal4
ENSMUSG00000047021	-9.53796	3.784e-06	7.46902e-05	181.64	0	40.8891	0	24.2332	0	Cfap65
ENSMUSG00000099722	-9.53779	1.37592e-06	3.38624e-05	138.263	0	47.5198	0	60.5831	0	Gm29154
ENSMUSG00000020673	-9.53657	1.7424e-05	0.000253978	208.751	0	33.1533	0	4.66024	0	Tpo
ENSMUSG00000101860	-9.53575	1.52121e-05	0.000228144	143.686	0	99.46	0	2.79614	0	Mindy4b-ps
ENSMUSG00000029695	-9.5356	6.38329e-05	0.000711552	227.728	0	17.6818	0	0.932047	0	Aass
ENSMUSG00000044378	-9.53529	1.44154e-05	0.000218459	195.196	0	46.4147	0	4.66024	0	Slc15a5
ENSMUSG00000105708	-9.5351	0.000173295	0.00155389	176.218	0	69.622	0	0	0	Gm36070
ENSMUSG00000026354	-9.53409	3.20268e-05	0.000414825	127.419	0	117.142	0	0.932047	0	Lct
ENSMUSG00000106122	-9.53389	1.36941e-08	8.45483e-07	306.349	0	101.67	0.524192	70.8356	0	Gm42610
ENSMUSG00000109162	-9.53351	1.41389e-06	3.46149e-05	119.286	0	37.5738	0	88.5445	0	2900027M19Rik
ENSMUSG00000047462	-9.5327	0.000228158	0.00192533	216.884	0	28.7329	0	0	0	A530099J19Rik
ENSMUSG00000031936	-9.53127	0.00026889	0.00218267	227.728	0	17.6818	0	0	0	Hephl1
ENSMUSG00000041695	-9.53127	0.00026889	0.00218267	227.728	0	17.6818	0	0	0	Kcnj2
ENSMUSG00000107996	-9.52809	1.29199e-06	3.21828e-05	75.9094	0	121.562	0	46.6024	0	Gm44228
ENSMUSG00000109203	-9.52723	1.56346e-05	0.000233083	135.552	0	106.091	0	2.79614	0	Gm32849
ENSMUSG00000099768	-9.52569	0.000178681	0.00159284	173.507	0	70.7271	0	0	0	Gm29293
ENSMUSG00000032744	-9.52563	3.78559e-05	0.000471464	27.1105	0	214.392	0	1.86409	0	Heyl
ENSMUSG00000097924	-9.52514	0.000170458	0.00153446	154.53	0	89.514	0	0	0	A730020E08Rik
ENSMUSG00000042757	-9.52046	1.78321e-05	0.000258488	192.484	0	47.5198	0	3.72819	0	Tmem108
ENSMUSG00000097301	-9.51989	0.000179958	0.00160189	168.085	0	75.1476	0	0	0	AW121686
ENSMUSG00000025013	-9.51924	2.69213e-05	0.000358761	208.751	0	32.0482	0	2.79614	0	Tll2
ENSMUSG00000028362	-9.51779	2.16569e-05	0.000301079	119.286	0	121.562	0	1.86409	0	Tnfsf8
ENSMUSG00000020651	-9.51757	3.32653e-05	0.00042776	206.04	0	35.3636	0	1.86409	0	Slc26a4
ENSMUSG00000030849	-9.51535	1.13929e-07	4.56137e-06	319.904	0	135.929	0	16.7768	0.597985	Fgfr2
ENSMUSG00000110447	-9.51524	5.19857e-05	0.000601126	208.751	0	33.1533	0	0.932047	0	Gm31518
ENSMUSG00000074052	-9.51434	1.51049e-05	0.000226846	168.085	0	70.7271	0	3.72819	0	BC048644
ENSMUSG00000105890	-9.51329	0.000184984	0.00163788	168.085	0	74.0425	0	0	0	Gm42780
ENSMUSG00000087110	-9.51302	6.15943e-06	0.000110731	162.663	0	68.5169	0	11.1846	0	Gm11264
ENSMUSG00000000982	-9.51163	1.32035e-15	5.7646e-13	184.351	0	670.803	1.04838	413.829	0.597985	Ccl3
ENSMUSG00000000766	-9.5113	2.7006e-05	0.000359368	181.64	0	58.5709	0	1.86409	0	Oprm1
ENSMUSG00000044647	-9.51096	3.46692e-05	0.000441628	206.04	0	34.2585	0	1.86409	0	Csrnp3
ENSMUSG00000063447	-9.51071	4.41363e-05	0.000532102	227.728	0	3.31533	0	11.1846	0	Ube2d2b
ENSMUSG00000038143	-9.50987	1.85651e-09	1.6134e-07	740.116	1.37201	153.61	0	32.6216	0	Stox2
ENSMUSG00000034923	-9.5079	6.753e-06	0.000119412	189.773	0	34.2585	0	17.7089	0	Ly6g6f
ENSMUSG00000055312	-9.50397	5.81596e-06	0.000105857	178.929	0	45.3096	0	16.7768	0	Them7
ENSMUSG00000101918	-9.50174	2.78416e-05	0.000368349	178.929	0	59.676	0	1.86409	0	Olfr1225
ENSMUSG00000035910	-9.50081	1.22196e-06	3.09063e-05	84.0425	0	58.5709	0	96.9329	0	Dcdc2a
ENSMUSG00000011118	-9.49992	7.52689e-06	0.000130701	168.085	0	61.8862	0	10.2525	0	Panx3
ENSMUSG00000061356	-9.49269	7.4136e-06	0.000129101	187.062	0	35.3636	0	16.7768	0	Nuggc
ENSMUSG00000039620	-9.49011	2.22635e-05	0.000305802	195.196	0	39.784	0	3.72819	0	6430573F11Rik
ENSMUSG00000103151	-9.48876	0.00021117	0.00181539	176.218	0	61.8862	0	0	0	Gm38292
ENSMUSG00000048424	-9.48764	8.29617e-06	0.000141382	192.484	0	25.4176	0	20.505	0	Ranbp3l
ENSMUSG00000102194	-9.48749	3.1333e-05	0.000407195	184.351	0	51.9402	0	1.86409	0	Gm38169
ENSMUSG00000020177	-9.48717	0.000223966	0.00189869	187.062	0	50.8351	0	0	0	9530003J23Rik
ENSMUSG00000024044	-9.48591	5.88775e-06	0.000106727	151.819	0	72.9374	0	13.0487	0	Epb41l3
ENSMUSG00000061080	-9.48382	1.81623e-05	0.000262652	170.796	0	62.9914	0	3.72819	0	Lsamp
ENSMUSG00000096141	-9.48292	1.34111e-07	5.16637e-06	347.014	0.686007	93.9345	0	21.4371	0	Dnah7a
ENSMUSG00000051435	-9.48225	2.9446e-06	6.1428e-05	138.263	0	71.8322	0	27.0294	0	Fhad1
ENSMUSG00000039716	-9.48187	1.27974e-07	4.9823e-06	330.748	0	111.616	0	19.573	0.597985	Dock3
ENSMUSG00000086484	-9.4809	4.65559e-06	8.83742e-05	168.085	0	24.3125	0	44.7383	0	Nron
ENSMUSG00000051652	-9.4797	8.26258e-06	0.00014094	154.53	0	72.9374	0	9.32047	0	Lrrc3
ENSMUSG00000036928	-9.47963	0.000239454	0.00199858	192.484	0	44.2045	0	0	0	Stag3
ENSMUSG00000025082	-9.47902	3.20807e-06	6.54354e-05	151.819	0	54.1505	0	30.7576	0	Vwa2
ENSMUSG00000075023	-9.4783	5.09817e-05	0.000593179	187.062	0	48.6249	0	0.932047	0	Accsl
ENSMUSG00000090336	-9.47737	2.38256e-05	0.000324103	176.218	0	57.4658	0	2.79614	0	4932443I19Rik
ENSMUSG00000108571	-9.47664	0.000238557	0.00199317	189.773	0	46.4147	0	0	0	Gm6855
ENSMUSG00000018865	-9.47602	1.95746e-06	4.5093e-05	73.1983	0	119.352	0	42.8742	0	Sult4a1
ENSMUSG00000035831	-9.47269	3.06974e-05	0.000400639	170.796	0	62.9914	0	1.86409	0	Krt25
ENSMUSG00000085864	-9.47183	3.19579e-05	0.000414435	176.218	0	57.4658	0	1.86409	0	C330019F10Rik
ENSMUSG00000079112	-9.47148	2.19276e-05	0.000303695	184.351	0	47.5198	0	3.72819	0	Fam90a1a
ENSMUSG00000063632	-9.46909	5.88192e-07	1.68526e-05	355.147	0.686007	96.1447	0	6.52433	0	Sox11
ENSMUSG00000075387	-9.46868	0.000212967	0.00182655	151.819	0	82.8834	0	0	0	Olfr341
ENSMUSG00000032093	-9.46506	1.08246e-05	0.000172637	189.773	0	30.9431	0	13.9807	0	Cd3e
ENSMUSG00000103099	-9.46385	7.81766e-06	0.000134856	154.53	0	68.5169	0	11.1846	0	Gm6074
ENSMUSG00000109421	-9.46369	0.000299825	0.00238624	208.751	0	25.4176	0	0	0	Gm44998
ENSMUSG00000109450	-9.46322	0.000225858	0.00191083	165.374	0	68.5169	0	0	0	Gm39043
ENSMUSG00000034098	-9.46166	2.25896e-05	0.000309585	181.64	0	48.6249	0	3.72819	0	Fstl5
ENSMUSG00000030468	-9.45857	2.66004e-08	1.40164e-06	281.949	0.686007	119.352	0	53.1267	0	Siglecg
ENSMUSG00000102198	-9.45795	2.54696e-06	5.44967e-05	89.4646	0	33.1533	0	109.982	0	Gm38173
ENSMUSG00000085591	-9.45642	3.81169e-05	0.000474186	187.062	0	44.2045	0	1.86409	0	Gm13479
ENSMUSG00000022187	-9.45469	0.00044673	0.00323782	225.017	0	7.73578	0	0	0	Gm5546
ENSMUSG00000031212	-9.45359	0.000220975	0.00188029	138.263	0	93.9345	0	0	0	Pgr15l
ENSMUSG00000104865	-9.4533	1.02361e-05	0.000165629	121.997	0	102.775	0	7.45638	0	Gm42708
ENSMUSG00000085961	-9.45007	4.79143e-05	0.000566073	149.108	0	81.7782	0	0.932047	0	Gm15904
ENSMUSG00000074361	-9.44789	7.48864e-06	0.000130284	127.419	0	92.8294	0	11.1846	0	C5ar2
ENSMUSG00000108956	-9.44418	0.000236529	0.00197957	154.53	0	76.2527	0	0	0	Gm45179
ENSMUSG00000020627	-9.4419	7.95426e-07	2.17373e-05	254.839	0	190.079	0.524192	3.72819	0	Klhl29
ENSMUSG00000026840	-9.44149	1.96874e-05	0.000278986	170.796	0	55.2556	0	4.66024	0	Lamc3
ENSMUSG00000105716	-9.4406	2.08513e-05	0.000292093	176.218	0	49.73	0	4.66024	0	Gm43522
ENSMUSG00000074061	-9.43921	2.75952e-06	5.83638e-05	130.13	0	55.2556	0	44.7383	0	Fbxw19
ENSMUSG00000050122	-9.43754	1.5298e-05	0.000229183	352.436	0	95.0396	0.524192	0	0	Vwa3b
ENSMUSG00000096440	-9.43677	7.28212e-06	0.000127184	138.263	0	78.4629	0	13.0487	0	Vmn2r-ps20
ENSMUSG00000082275	-9.43431	3.69157e-06	7.326e-05	105.731	0	25.4176	0	97.8649	0	Gm14854
ENSMUSG00000020033	-9.43342	6.31005e-06	0.000112885	138.263	0	75.1476	0	15.8448	0	4930463O16Rik
ENSMUSG00000045761	-9.4334	1.11892e-05	0.000177935	170.796	0	47.5198	0	11.1846	0	Togaram2
ENSMUSG00000047976	-9.43271	3.60784e-06	7.2145e-05	135.552	0	32.0482	0	61.5151	0	Kcna1
ENSMUSG00000043719	-9.43131	5.69102e-06	0.000104252	157.241	0	24.3125	0	47.5344	0	Col6a6
ENSMUSG00000051237	-9.42862	4.45976e-05	0.000536958	187.062	0	39.784	0	1.86409	0	9230109A22Rik
ENSMUSG00000109753	-9.42855	6.54127e-08	2.92669e-06	309.06	0	96.1447	0.524192	40.078	0	Gm45633
ENSMUSG00000040650	-9.42853	5.5012e-06	0.000101179	159.952	0	34.2585	0	34.4857	0	Cyp2b23
ENSMUSG00000086909	-9.4254	4.12279e-06	8.01722e-05	143.686	0	50.8351	0	33.5537	0	Gm4926
ENSMUSG00000012819	-9.42526	2.23266e-10	2.67791e-08	534.077	1.37201	270.752	0	61.5151	0	Cdh23
ENSMUSG00000060560	-9.42497	1.39747e-12	3.12505e-10	889.224	1.37201	314.957	0.524192	57.7869	0	Ces4a
ENSMUSG00000030020	-9.42459	1.1376e-06	2.92971e-05	254.839	0	185.659	0	2.79614	0.597985	Prickle2
ENSMUSG00000070533	-9.42447	0.00044099	0.00320763	216.884	0	11.0511	0	0	0	Wfdc8
ENSMUSG00000009356	-9.42214	0.000294502	0.00234999	184.351	0	43.0993	0	0	0	Lpo
ENSMUSG00000072553	-9.42153	0.000268442	0.00218096	165.374	0	61.8862	0	0	0	Gm525
ENSMUSG00000058159	-9.42132	0.000307175	0.00242578	189.773	0	37.5738	0	0	0	T2
ENSMUSG00000108821	-9.42051	0.000322809	0.00251994	195.196	0	32.0482	0	0	0	4933423L19Rik
ENSMUSG00000039057	-9.42024	2.82121e-09	2.27896e-07	534.077	0	211.076	1.04838	33.5537	0	Myo16
ENSMUSG00000106384	-9.41945	5.8981e-05	0.000663925	165.374	0	60.7811	0	0.932047	0	Gm43188
ENSMUSG00000029188	-9.41338	7.9772e-06	0.000136849	151.819	0	58.5709	0	15.8448	0	Slc34a2
ENSMUSG00000060314	-9.41266	1.01775e-05	0.0001653	130.13	0	9.946	0	85.7483	0	Zfp941
ENSMUSG00000105974	-9.41195	0.00030289	0.00240125	181.64	0	44.2045	0	0	0	Gm43318
ENSMUSG00000000560	-9.41151	4.6362e-05	0.000551681	197.907	0	25.4176	0	2.79614	0	Gabra2
ENSMUSG00000017204	-9.41031	3.53515e-05	0.000447062	127.419	0	96.1447	0	1.86409	0	Gsdma
ENSMUSG00000067596	-9.40968	1.67147e-05	0.000245788	178.929	0	37.5738	0	9.32047	0	Krt74
ENSMUSG00000033981	-9.40866	3.13117e-05	0.000407195	200.618	0	17.6818	0	7.45638	0	Gria2
ENSMUSG00000084795	-9.40634	0.000345863	0.0026518	195.196	0	29.838	0	0	0	Gm14617
ENSMUSG00000016458	-9.40602	4.86858e-06	9.17525e-05	130.13	0	69.622	0	25.1653	0	Wt1
ENSMUSG00000074502	-9.40428	1.2205e-05	0.000189503	178.929	0	26.5227	0	19.573	0	Ubtfl1
ENSMUSG00000086813	-9.40177	4.42449e-06	8.4866e-05	138.263	0	49.73	0	36.3498	0	Gm13657
ENSMUSG00000104625	-9.40169	0.000311683	0.00245506	178.929	0	45.3096	0	0	0	Gm42448
ENSMUSG00000034115	-9.40101	1.23814e-05	0.000191271	146.397	0	68.5169	0	9.32047	0	Scn11a
ENSMUSG00000004709	-9.4009	1.37743e-07	5.28407e-06	219.595	0	197.815	0	18.6409	0.597985	Cd244
ENSMUSG00000062410	-9.39891	1.58462e-05	0.000234817	311.771	0	123.772	0	0	0.597985	Hsd3b3
ENSMUSG00000057818	-9.39863	7.23423e-06	0.000126578	159.952	0	34.2585	0	29.8255	0	1600029O15Rik
ENSMUSG00000000223	-9.39839	1.96136e-06	4.51259e-05	352.436	0	80.6731	0	2.79614	0.597985	Drp2
ENSMUSG00000094353	-9.39706	9.12959e-06	0.000152052	168.085	0	28.7329	0	27.0294	0	Olfr150
ENSMUSG00000103391	-9.39627	2.58368e-06	5.52178e-05	94.8867	0	56.3607	0	71.7676	0	Gm38302
ENSMUSG00000110016	-9.39312	0.000276271	0.00222717	97.5978	0	124.878	0	0	0	Gm20751
ENSMUSG00000022619	-9.39277	4.15518e-08	2.0157e-06	254.839	0.686007	132.613	0	46.6024	0	Mapk8ip2
ENSMUSG00000108286	-9.39258	2.17898e-05	0.000302239	146.397	0	71.8322	0	4.66024	0	Gm44224
ENSMUSG00000034384	-9.39176	8.33652e-06	0.000141938	146.397	0	59.676	0	16.7768	0	Barhl2
ENSMUSG00000065045	-9.39161	0.000290026	0.00232145	151.819	0	70.7271	0	0	0	Gm24046
ENSMUSG00000105772	-9.39125	5.91563e-05	0.00066549	206.04	0	13.2613	0	3.72819	0	Gm42496
ENSMUSG00000005220	-9.38986	3.48601e-05	0.000442986	200.618	0	11.0511	0	11.1846	0	Corin
ENSMUSG00000022212	-9.3895	4.00035e-05	0.000491652	178.929	0	40.8891	0	2.79614	0	Cpne6
ENSMUSG00000086273	-9.38903	0.000310859	0.00245065	168.085	0	54.1505	0	0	0	Rbm46os
ENSMUSG00000027996	-9.38849	2.28671e-05	0.000312455	184.351	0	29.838	0	8.38842	0	Sfrp2
ENSMUSG00000031028	-9.38743	9.98958e-06	0.000162971	165.374	0	36.4687	0	20.505	0	Tub
ENSMUSG00000070323	-9.38589	5.71433e-05	0.000646225	187.062	0	33.1533	0	1.86409	0	Mmp27
ENSMUSG00000042849	-9.38565	0.000363022	0.00275299	189.773	0	32.0482	0	0	0	Olfr1414
ENSMUSG00000024440	-9.38562	4.52508e-05	0.000541268	195.196	0	23.2073	0	3.72819	0	Pcdh12
ENSMUSG00000095531	-9.38452	7.16201e-06	0.000125821	154.53	0	30.9431	0	36.3498	0	Gm25284
ENSMUSG00000109764	-9.38162	0.000379856	0.00285351	192.484	0	28.7329	0	0	0	Klkb1
ENSMUSG00000092460	-9.38134	4.92416e-05	0.00057549	170.796	0	48.6249	0	1.86409	0	Gm8878
ENSMUSG00000086712	-9.37991	2.88785e-06	6.05193e-05	56.932	0	89.514	0	73.6317	0	AI427809
ENSMUSG00000026272	-9.37947	0.000312708	0.00246047	159.952	0	60.7811	0	0	0	Agxt
ENSMUSG00000031786	-9.37821	6.60686e-06	0.000117053	149.108	0	35.3636	0	36.3498	0	Drc7
ENSMUSG00000042459	-9.37821	8.41002e-06	0.000143056	157.241	0	25.4176	0	38.2139	0	Bpifa2
ENSMUSG00000038257	-9.37778	6.52104e-05	0.000722515	192.484	0	26.5227	0	1.86409	0	Glra3
ENSMUSG00000097247	-9.37758	0.000399107	0.00296411	195.196	0	25.4176	0	0	0	1500012K07Rik
ENSMUSG00000026042	-9.37661	0.0122621	0.0462846	441.901	0	2341.73	0	0	4.1859	Col5a2
ENSMUSG00000050818	-9.37142	1.91007e-05	0.00027256	170.796	0	39.784	0	9.32047	0	Olfr330
ENSMUSG00000103402	-9.36915	1.65327e-05	0.000243894	135.552	0	76.2527	0	7.45638	0	Gm37930
ENSMUSG00000100580	-9.36816	1.72727e-05	0.000252575	154.53	0	56.3607	0	8.38842	0	4933436I20Rik
ENSMUSG00000090981	-9.36677	8.54574e-06	0.000145035	154.53	0	37.5738	0	27.0294	0	Olfr718-ps1
ENSMUSG00000030507	-9.36663	0.000317934	0.00249116	149.108	0	69.622	0	0	0	Dbx1
ENSMUSG00000078796	-9.36538	5.35183e-07	1.5602e-05	333.459	0	80.6731	0	12.1166	0.597985	Zfp541
ENSMUSG00000018459	-9.36318	2.21348e-05	0.000305177	176.218	0	33.1533	0	9.32047	0	Slc13a3
ENSMUSG00000100529	-9.36313	0.000351438	0.0026825	170.796	0	47.5198	0	0	0	Gm19261
ENSMUSG00000099930	-9.36016	1.34615e-05	0.000205532	159.952	0	14.3664	0	43.8062	0	Gm2396
ENSMUSG00000048834	-9.35997	6.12718e-06	0.000110368	135.552	0	32.0482	0	50.3305	0	Vstm2a
ENSMUSG00000031651	-9.3599	0.00035128	0.0026825	168.085	0	49.73	0	0	0	Triml1
ENSMUSG00000034813	-9.35936	8.09688e-08	3.49347e-06	298.215	0	68.5169	0.524192	57.7869	0	Grip1
ENSMUSG00000032110	-9.35816	0.00037761	0.00283897	178.929	0	38.6789	0	0	0	Acrv1
ENSMUSG00000087131	-9.35807	5.02374e-05	0.000585263	157.241	0	58.5709	0	1.86409	0	Gm16152
ENSMUSG00000021732	-9.35806	4.38216e-05	0.00053008	170.796	0	44.2045	0	2.79614	0	Fgf10
ENSMUSG00000086852	-9.35711	2.55257e-05	0.000343913	140.975	0	71.8322	0	4.66024	0	NA
ENSMUSG00000105082	-9.356	2.23535e-07	7.71931e-06	281.949	0	122.667	0	18.6409	0.597985	Aqp10-ps
ENSMUSG00000110027	-9.35546	6.54813e-06	0.00011635	138.263	0	46.4147	0	32.6216	0	C030029H02Rik
ENSMUSG00000020436	-9.35461	1.0063e-05	0.000163877	157.241	0	26.5227	0	33.5537	0	Gabrg2
ENSMUSG00000098203	-9.35399	1.95107e-05	0.00027691	170.796	0	11.0511	0	35.4178	0	Gm9568
ENSMUSG00000054910	-9.35393	2.86931e-05	0.00037825	124.708	0	88.4089	0	3.72819	0	4931415C17Rik
ENSMUSG00000050108	-9.35391	8.80819e-06	0.000148316	151.819	0	36.4687	0	28.8935	0	Bpifc
ENSMUSG00000055416	-9.3528	0.000331046	0.00256351	143.686	0	72.9374	0	0	0	Fam136b-ps
ENSMUSG00000085449	-9.34999	9.34932e-06	0.000155148	151.819	0	38.6789	0	26.0973	0	Gm15520
ENSMUSG00000027482	-9.34622	7.1716e-05	0.000780449	127.419	0	87.3038	0	0.932047	0	Bpifa3
ENSMUSG00000029015	-9.34612	3.83033e-05	0.000476181	168.085	0	44.2045	0	3.72819	0	Slc26a5
ENSMUSG00000046367	-9.34515	8.79707e-07	2.36528e-05	319.904	0	92.8294	0.524192	7.45638	0	Mgat4e
ENSMUSG00000061959	-9.3451	0.000373839	0.00282081	168.085	0	47.5198	0	0	0	Ces1e
ENSMUSG00000109398	-9.34423	0.000387167	0.00289539	173.507	0	41.9942	0	0	0	Gm3854
ENSMUSG00000055471	-9.34355	9.79279e-06	0.000160617	151.819	0	26.5227	0	37.2819	0	Alk
ENSMUSG00000042638	-9.34249	0.000423475	0.00310282	184.351	0	30.9431	0	0	0	Gucy2c
ENSMUSG00000022432	-9.34084	2.22539e-05	0.000305802	162.663	0	44.2045	0	8.38842	0	Smc1b
ENSMUSG00000042265	-9.33816	1.51518e-16	8.41936e-14	208.751	1.37201	1018.91	1.04838	320.624	0	Trem1
ENSMUSG00000034151	-9.33745	2.17725e-05	0.000302227	168.085	0	36.4687	0	10.2525	0	Zbbx
ENSMUSG00000055937	-9.33656	2.20317e-05	0.000304428	151.819	0	55.2556	0	7.45638	0	Krt28
ENSMUSG00000110747	-9.33512	1.47787e-05	0.00022286	162.663	0	33.1533	0	18.6409	0	Gm35657
ENSMUSG00000042246	-9.33387	6.16129e-05	0.000689741	168.085	0	44.2045	0	1.86409	0	Tmc7
ENSMUSG00000047992	-9.33248	1.45845e-05	0.000220657	140.975	0	60.7811	0	12.1166	0	Fam69c
ENSMUSG00000039809	-9.33055	1.90912e-05	0.00027256	165.374	0	35.3636	0	13.0487	0	Gabbr2
ENSMUSG00000100396	-9.33023	8.45295e-05	0.000896729	189.773	0	22.1022	0	1.86409	0	Gm29367
ENSMUSG00000087037	-9.33001	0.000492828	0.00349053	192.484	0	20.9971	0	0	0	4930432L08Rik
ENSMUSG00000105624	-9.32938	0.000192895	0.00169206	206.04	0	6.63067	0	0.932047	0	Gm43187
ENSMUSG00000108678	-9.32786	4.58126e-05	0.000546206	119.286	0	2.21022	0	91.3406	0	Gm44758
ENSMUSG00000058183	-9.32774	0.000386248	0.00288969	159.952	0	53.0454	0	0	0	Mmel1
ENSMUSG00000003882	-9.32756	8.01586e-06	0.000137371	81.3315	0	22.1022	0	109.05	0	Il7r
ENSMUSG00000110125	-9.32646	1.20354e-05	0.000188145	140.975	0	55.2556	0	16.7768	0	Gm33148
ENSMUSG00000024534	-9.32599	1.21319e-05	0.000188688	151.819	0	39.784	0	21.4371	0	Sncaip
ENSMUSG00000045493	-9.32596	0.000411854	0.00303665	170.796	0	41.9942	0	0	0	Bhlhe23
ENSMUSG00000084336	-9.3242	0.000449926	0.00325456	181.64	0	30.9431	0	0	0	Olfr1269
ENSMUSG00000110101	-9.32414	1.80071e-05	0.000260818	151.819	0	49.73	0	11.1846	0	Gm6249
ENSMUSG00000049122	-9.32334	0.000476856	0.00339841	187.062	0	25.4176	0	0	0	Frmd3
ENSMUSG00000071089	-9.32141	4.1571e-05	0.000507178	173.507	0	34.2585	0	4.66024	0	Trim75
ENSMUSG00000021997	-9.32124	1.18509e-05	0.000185894	151.819	0	35.3636	0	25.1653	0	Lrrc63
ENSMUSG00000081716	-9.3188	5.23098e-05	0.000604034	105.731	0	103.88	0	1.86409	0	Gm14839
ENSMUSG00000027661	-9.31752	0.000443465	0.00322052	176.218	0	35.3636	0	0	0	Slc2a10
ENSMUSG00000097794	-9.31687	0.000399044	0.00296411	157.241	0	54.1505	0	0	0	Gm2990
ENSMUSG00000083202	-9.31474	7.86631e-07	2.15612e-05	271.105	0.686007	132.613	0	7.45638	0	Gm12388
ENSMUSG00000109722	-9.31404	0.000395008	0.00294442	62.3541	0	148.085	0	0	0	Gm10578
ENSMUSG00000026768	-9.31353	0.000400032	0.00296739	154.53	0	56.3607	0	0	0	Itga8
ENSMUSG00000035513	-9.31244	4.33637e-05	0.000525899	132.841	0	75.1476	0	2.79614	0	Ntng2
ENSMUSG00000103563	-9.31241	0.000488265	0.00346358	184.351	0	26.5227	0	0	0	8030445P17Rik
ENSMUSG00000083989	-9.31216	3.53507e-05	0.000447062	127.419	0	79.568	0	3.72819	0	Gm12607
ENSMUSG00000082457	-9.31089	3.05095e-05	0.000398551	127.419	0	78.4629	0	4.66024	0	Gm13776
ENSMUSG00000022126	-9.30997	5.67159e-06	0.000104104	92.1757	0	80.6731	0	37.2819	0	Acod1
ENSMUSG00000107883	-9.30906	2.62632e-05	0.000352317	173.507	0	23.2073	0	13.9807	0	Gm44062
ENSMUSG00000044708	-9.30841	2.62698e-05	0.000352317	113.864	0	90.6191	0	5.59228	0	Kcnj10
ENSMUSG00000080992	-9.30745	0.000438354	0.00319226	168.085	0	41.9942	0	0	0	Psmb5-ps
ENSMUSG00000028523	-9.30743	9.6057e-06	0.000158115	138.263	0	30.9431	0	41.0101	0	Tctex1d1
ENSMUSG00000084377	-9.30716	0.0003806	0.00285793	124.708	0	85.0936	0	0	0	Gm15302
ENSMUSG00000000392	-9.30323	2.39937e-06	5.21758e-05	29.8215	0	368.002	0	8.38842	0.597985	Fap
ENSMUSG00000019865	-9.30176	1.56658e-05	0.000233358	143.686	0	50.8351	0	14.9128	0	Nmbr
ENSMUSG00000072596	-9.30063	1.91325e-05	0.000272598	46.0878	0	149.19	0	13.0487	0	Ear2
ENSMUSG00000030636	-9.30048	2.28339e-05	0.000312234	149.108	0	50.8351	0	9.32047	0	1700010L04Rik
ENSMUSG00000086630	-9.29969	2.36833e-05	0.000322574	159.952	0	11.0511	0	38.2139	0	Gm14397
ENSMUSG00000036218	-9.29802	1.12768e-05	0.00017843	140.975	0	40.8891	0	27.0294	0	Pdzrn4
ENSMUSG00000030380	-9.29742	1.03334e-13	2.82811e-11	707.584	0.686007	266.332	1.04838	138.875	0	Mzf1
ENSMUSG00000032489	-9.29572	2.73476e-09	2.25335e-07	498.833	0	211.076	0.524192	24.2332	0.597985	Kif9
ENSMUSG00000020405	-9.29551	0.000469548	0.00335938	170.796	0	37.5738	0	0	0	Fabp6
ENSMUSG00000106310	-9.29448	1.34602e-05	0.000205532	130.13	0	16.5767	0	61.5151	0	Gm43523
ENSMUSG00000004296	-9.29362	1.68542e-05	0.000247244	154.53	0	34.2585	0	19.573	0	Il12b
ENSMUSG00000104791	-9.29174	3.37332e-07	1.08001e-05	271.105	0	116.037	0.524192	17.7089	0	4930511M18Rik
ENSMUSG00000055368	-9.29124	9.35479e-05	0.000974098	138.263	0	68.5169	0	0.932047	0	Slc6a2
ENSMUSG00000034087	-9.28904	6.44696e-05	0.000717023	184.351	0	18.7869	0	4.66024	0	Nlrp4b
ENSMUSG00000093867	-9.28877	2.53263e-06	5.43168e-05	292.793	0	108.301	0.524192	2.79614	0	Gsdmcl2
ENSMUSG00000086162	-9.2879	3.92311e-07	1.22344e-05	298.215	0	86.1987	0	19.573	0.597985	Gm16342
ENSMUSG00000105107	-9.28761	1.66017e-05	0.000244519	130.13	0	64.0965	0	13.0487	0	Gm43412
ENSMUSG00000022057	-9.28756	6.14875e-19	4.90216e-16	216.884	0.686007	2756.15	4.19353	546.18	0.597985	Adamdec1
ENSMUSG00000027419	-9.28607	4.86925e-05	0.000571622	130.13	0	74.0425	0	2.79614	0	Pcsk2
ENSMUSG00000028023	-9.28549	1.23053e-05	0.000190415	130.13	0	56.3607	0	20.505	0	Pitx2
ENSMUSG00000109874	-9.28514	0.000577915	0.00394389	187.062	0	19.892	0	0	0	Gm9911
ENSMUSG00000109555	-9.28315	0.000420081	0.00308244	130.13	0	76.2527	0	0	0	Gm44891
ENSMUSG00000086129	-9.2822	0.000426289	0.00311926	135.552	0	70.7271	0	0	0	Gm13558
ENSMUSG00000110640	-9.28083	0.000616445	0.00412395	189.773	0	16.5767	0	0	0	Gm45903
ENSMUSG00000108118	-9.28033	0.000443015	0.00321853	146.397	0	59.676	0	0	0	Gm34312
ENSMUSG00000107460	-9.28011	9.72885e-05	0.00100393	135.552	0	69.622	0	0.932047	0	Gm44186
ENSMUSG00000108200	-9.27973	0.000423534	0.00310282	127.419	0	78.4629	0	0	0	Gm43931
ENSMUSG00000038403	-9.27814	1.12247e-05	0.000178051	130.13	0	49.73	0	26.0973	0	Hfe2
ENSMUSG00000094832	-9.2756	7.28574e-05	0.000790056	151.819	0	51.9402	0	1.86409	0	Gm21846
ENSMUSG00000097361	-9.27362	4.91885e-05	0.000575236	113.864	0	88.4089	0	2.79614	0	4930550C17Rik
ENSMUSG00000105939	-9.27347	0.000446997	0.00323847	140.975	0	64.0965	0	0	0	Gm43322
ENSMUSG00000050966	-9.27254	1.52162e-05	0.000228144	146.397	0	30.9431	0	27.9614	0	Lin28a
ENSMUSG00000111424	-9.27246	1.73165e-05	0.000252813	146.397	0	18.7869	0	40.078	0	Gm48478
ENSMUSG00000051176	-9.27159	0.000467946	0.00335054	151.819	0	53.0454	0	0	0	Zfp42
ENSMUSG00000104203	-9.27134	0.000546023	0.00377827	176.218	0	28.7329	0	0	0	Gm37398
ENSMUSG00000109114	-9.27067	1.27045e-05	0.000195438	138.263	0	33.1533	0	33.5537	0	Gm44753
ENSMUSG00000035580	-9.27065	0.000481321	0.00342491	157.241	0	47.5198	0	0	0	Kcnh8
ENSMUSG00000083190	-9.27065	0.000481321	0.00342491	157.241	0	47.5198	0	0	0	Cyp4a30-ps
ENSMUSG00000085969	-9.27053	8.92408e-05	0.000937794	187.062	0	14.3664	0	3.72819	0	Gm15600
ENSMUSG00000084391	-9.27007	1.01571e-05	0.000165169	119.286	0	57.4658	0	27.9614	0	Gm13967
ENSMUSG00000028071	-9.27003	0.000449589	0.0032534	138.263	0	66.3067	0	0	0	Sh2d2a
ENSMUSG00000010476	-9.2698	7.04467e-05	0.00076846	140.975	0	61.8862	0	1.86409	0	Ebf3
ENSMUSG00000036510	-9.26443	7.345e-05	0.000795979	184.351	0	14.3664	0	5.59228	0	Cdh8
ENSMUSG00000042118	-9.26392	0.000446485	0.00323782	84.0425	0	119.352	0	0	0	Bhmt2
ENSMUSG00000092242	-9.26218	0.00046333	0.00333049	138.263	0	65.2016	0	0	0	Gm20515
ENSMUSG00000028487	-9.26064	0.000452954	0.00327182	124.708	0	78.4629	0	0	0	Bnc2
ENSMUSG00000030048	-9.26028	0.000484089	0.00344327	149.108	0	54.1505	0	0	0	Gkn3
ENSMUSG00000103122	-9.25932	0.000100601	0.00102655	100.309	0	101.67	0	0.932047	0	Gm37391
ENSMUSG00000086040	-9.25923	2.69204e-05	0.000358761	140.975	0	53.0454	0	9.32047	0	Wipf3
ENSMUSG00000053153	-9.25917	0.000177594	0.00158546	187.062	0	15.4716	0	0.932047	0	Spag16
ENSMUSG00000084905	-9.25912	0.000594275	0.00401371	178.929	0	24.3125	0	0	0	Gm12081
ENSMUSG00000040660	-9.25894	1.47073e-05	0.000222147	124.708	0	18.7869	0	59.651	0	Cyp2b9
ENSMUSG00000104130	-9.25794	6.79075e-05	0.000747331	100.309	0	100.565	0	1.86409	0	Gm36951
ENSMUSG00000015852	-9.25782	1.86546e-06	4.32999e-05	165.374	0	225.443	0.524192	3.72819	0	Fcrls
ENSMUSG00000030249	-9.25717	5.48629e-05	0.000626805	165.374	0	33.1533	0	4.66024	0	Abcc9
ENSMUSG00000069785	-9.25632	2.17242e-05	0.000301786	154.53	0	24.3125	0	24.2332	0	Gm11444
ENSMUSG00000044338	-9.25604	0.000459041	0.00330614	84.0425	0	118.247	0	0	0	Aplnr
ENSMUSG00000032894	-9.25429	0.000477559	0.0034021	138.263	0	64.0965	0	0	0	1700031F05Rik
ENSMUSG00000036961	-9.25286	1.36195e-05	0.000207535	132.841	0	27.6278	0	41.9421	0	Wnt8b
ENSMUSG00000098682	-9.25265	3.26645e-05	0.00042092	154.53	0	38.6789	0	9.32047	0	Otx2os1
ENSMUSG00000016283	-9.25212	0.000581174	0.00395841	173.507	0	28.7329	0	0	0	H2-M2
ENSMUSG00000028373	-9.25192	4.67284e-05	0.000555188	173.507	0	18.7869	0	10.2525	0	Astn2
ENSMUSG00000106358	-9.25177	0.000472809	0.00337744	130.13	0	71.8322	0	0	0	Gm7047
ENSMUSG00000082276	-9.25071	3.64864e-05	0.000457002	143.686	0	51.9402	0	6.52433	0	Gm13885
ENSMUSG00000097311	-9.25048	0.000530322	0.00369472	159.952	0	41.9942	0	0	0	Gm26871
ENSMUSG00000029420	-9.24899	1.30567e-05	0.000200353	124.708	0	51.9402	0	25.1653	0	Rimbp2
ENSMUSG00000066748	-9.24777	9.06327e-05	0.000949133	181.64	0	16.5767	0	3.72819	0	Olfr145
ENSMUSG00000103073	-9.24761	0.000114571	0.00113194	140.975	0	59.676	0	0.932047	0	Gm37904
ENSMUSG00000079445	-9.24748	8.96298e-06	0.00014975	43.3768	0	51.9402	0	105.321	0	B3gnt7
ENSMUSG00000106525	-9.24635	0.000492295	0.0034881	138.263	0	62.9914	0	0	0	Gm42695
ENSMUSG00000038879	-9.2451	0.000572747	0.00391591	168.085	0	33.1533	0	0	0	Nipal2
ENSMUSG00000108613	-9.2451	0.000572747	0.00391591	168.085	0	33.1533	0	0	0	Gm36694
ENSMUSG00000068302	-9.24502	0.000151588	0.00140624	192.484	0	4.42045	0	4.66024	0	Noto
ENSMUSG00000081783	-9.24383	1.41325e-05	0.000214526	132.841	0	37.5738	0	30.7576	0	Gm15599
ENSMUSG00000105514	-9.24285	0.000495232	0.0035008	135.552	0	65.2016	0	0	0	Gm42913
ENSMUSG00000111748	-9.24253	0.000548035	0.00378527	159.952	0	40.8891	0	0	0	Gm34885
ENSMUSG00000073530	-9.2375	0.000100239	0.00102458	165.374	0	33.1533	0	1.86409	0	Pappa2
ENSMUSG00000101966	-9.2364	9.96962e-06	0.00016279	333.459	0.686007	55.2556	0	0.932047	0	Gm5248
ENSMUSG00000037159	-9.23622	4.0769e-07	1.26494e-05	298.215	0	61.8862	0.524192	29.8255	0	Wee2
ENSMUSG00000096806	-9.23548	0.000547524	0.00378527	154.53	0	45.3096	0	0	0	Olfr312
ENSMUSG00000110372	-9.23227	2.05803e-05	0.000289673	111.153	0	75.1476	0	13.0487	0	Gm8096
ENSMUSG00000106637	-9.23098	0.000565737	0.0038781	157.241	0	41.9942	0	0	0	Gm42455
ENSMUSG00000041078	-9.23007	8.49089e-05	0.000898946	140.975	0	56.3607	0	1.86409	0	Grid1
ENSMUSG00000024679	-9.22999	5.00332e-25	8.34053e-22	471.722	0	2122.92	2.62096	864.008	2.98993	Ms4a6d
ENSMUSG00000106944	-9.2272	0.000504404	0.00355604	111.153	0	87.3038	0	0	0	Gm43843
ENSMUSG00000110147	-9.22711	2.82071e-05	0.000372916	121.997	0	67.4118	0	9.32047	0	Gm45324
ENSMUSG00000022122	-9.22647	0.000585681	0.00397764	159.952	0	38.6789	0	0	0	Ednrb
ENSMUSG00000053388	-9.22643	1.20984e-05	0.000188646	113.864	0	53.0454	0	31.6896	0	Trim50
ENSMUSG00000100706	-9.22467	4.40846e-05	0.000531829	162.663	0	9.946	0	26.0973	0	Gm19744
ENSMUSG00000018698	-9.22291	0.000584704	0.00397395	157.241	0	40.8891	0	0	0	Lhx1
ENSMUSG00000109755	-9.22271	2.00149e-05	0.000282753	132.841	0	18.7869	0	46.6024	0	Gm8489
ENSMUSG00000061311	-9.22101	0.000636333	0.00422708	168.085	0	29.838	0	0	0	Rag1
ENSMUSG00000074981	-9.22081	1.82632e-05	0.000263902	130.13	0	46.4147	0	21.4371	0	Dcdc5
ENSMUSG00000103081	-9.22	0.000127799	0.0012334	138.263	0	58.5709	0	0.932047	0	Pcdhgb8
ENSMUSG00000106126	-9.21712	0.00027241	0.00220441	192.484	0	3.31533	0	1.86409	0	Gm43781
ENSMUSG00000058934	-9.21643	4.47819e-05	0.000537764	165.374	0	15.4716	0	16.7768	0	Igf1os
ENSMUSG00000024979	-9.21334	0.000142429	0.00133524	151.819	0	44.2045	0	0.932047	0	Tectb
ENSMUSG00000106450	-9.21321	6.56749e-05	0.000727223	116.575	0	77.3578	0	2.79614	0	Gm43018
ENSMUSG00000085653	-9.21043	0.000126621	0.0012246	124.708	0	70.7271	0	0.932047	0	Gm15179
ENSMUSG00000097020	-9.21014	0.000834852	0.00524871	184.351	0	12.1562	0	0	0	Gm26613
ENSMUSG00000109328	-9.20997	0.000539791	0.00374221	116.575	0	79.568	0	0	0	Olfr1438-ps1
ENSMUSG00000060161	-9.20955	2.90342e-05	0.000382197	121.997	0	64.0965	0	10.2525	0	Klk1b7-ps
ENSMUSG00000110629	-9.20853	5.99288e-05	0.000672531	132.841	0	59.676	0	3.72819	0	4930567H12Rik
ENSMUSG00000090215	-9.20798	0.000553744	0.00381586	127.419	0	68.5169	0	0	0	Trim34b
ENSMUSG00000109127	-9.20727	2.30053e-05	0.000313874	135.552	0	41.9942	0	18.6409	0	Gm31135
ENSMUSG00000034810	-9.20622	0.000120204	0.00117681	181.64	0	9.946	0	4.66024	0	Scn7a
ENSMUSG00000092269	-9.20472	0.000683874	0.00448345	168.085	0	27.6278	0	0	0	Gm9577
ENSMUSG00000029442	-9.2037	2.51472e-08	1.34439e-06	450.034	0	197.815	1.04838	19.573	0	Wdr66
ENSMUSG00000051497	-9.20366	0.000575887	0.00393297	62.3541	0	132.613	0	0	0	Kcnj16
ENSMUSG00000102277	-9.20326	4.97475e-05	0.000580293	159.952	0	26.5227	0	9.32047	0	A130050O07Rik
ENSMUSG00000111290	-9.20206	0.000648306	0.00429014	159.952	0	35.3636	0	0	0	Gm5122
ENSMUSG00000039313	-9.2018	0.000147148	0.00137316	184.351	0	6.63067	0	4.66024	0	AF529169
ENSMUSG00000101061	-9.19934	0.000255302	0.00210688	184.351	0	9.946	0	0.932047	0	Platr1
ENSMUSG00000081108	-9.19844	0.000646441	0.00427934	157.241	0	37.5738	0	0	0	Gm4234
ENSMUSG00000083586	-9.19832	2.72192e-05	0.000361418	140.975	0	17.6818	0	36.3498	0	Gm8688
ENSMUSG00000030077	-9.19818	0.000561634	0.00385574	113.864	0	80.6731	0	0	0	Chl1
ENSMUSG00000025754	-9.19799	0.000147307	0.00137349	146.397	0	47.5198	0	0.932047	0	Agbl1
ENSMUSG00000029848	-9.19778	0.000592623	0.00400994	138.263	0	56.3607	0	0	0	Stra8
ENSMUSG00000035653	-9.19678	0.000606879	0.00407333	143.686	0	50.8351	0	0	0	Lrfn5
ENSMUSG00000055409	-9.1965	0.000709407	0.00461127	168.085	0	26.5227	0	0	0	Nell1
ENSMUSG00000004415	-9.19635	5.58859e-07	1.62406e-05	292.793	0.686007	58.5709	0	27.9614	0	Col26a1
ENSMUSG00000065491	-9.19579	0.000624026	0.00416252	149.108	0	45.3096	0	0	0	Mir7b
ENSMUSG00000043145	-9.19556	0.000755917	0.0048572	173.507	0	20.9971	0	0	0	Gm11292
ENSMUSG00000041141	-9.19538	5.49352e-05	0.000627117	130.13	0	59.676	0	4.66024	0	Pnmal1
ENSMUSG00000086443	-9.19356	0.000573005	0.00391621	116.575	0	77.3578	0	0	0	4933421A08Rik
ENSMUSG00000068085	-9.19271	1.02429e-05	0.000165629	84.0425	0	57.4658	0	52.1946	0	Cyp2d11
ENSMUSG00000045382	-9.19123	1.68005e-07	6.14913e-06	37.9547	0.686007	203.341	0	134.215	0	Cxcr4
ENSMUSG00000021991	-9.19019	0.000668782	0.00440512	157.241	0	36.4687	0	0	0	Cacna2d3
ENSMUSG00000102926	-9.18971	3.70421e-05	0.00046333	138.263	0	45.3096	0	10.2525	0	Gm37151
ENSMUSG00000011350	-9.18854	7.34903e-05	0.000795979	116.575	0	74.0425	0	2.79614	0	Gm5893
ENSMUSG00000097446	-9.18751	1.20955e-05	0.000188646	75.9094	0	80.6731	0	36.3498	0	Gm26629
ENSMUSG00000091967	-9.18585	9.62e-06	0.000158208	290.082	0.686007	85.0936	0	0.932047	0	Vmn2r-ps5
ENSMUSG00000029445	-9.18498	0.000129112	0.0012441	162.663	0	28.7329	0	1.86409	0	Hpd
ENSMUSG00000005540	-9.18493	2.38539e-05	0.000324246	132.841	0	22.1022	0	38.2139	0	Fcer2a
ENSMUSG00000032680	-9.18397	9.0431e-07	2.42078e-05	279.238	0	81.7782	0.524192	14.9128	0	6820408C15Rik
ENSMUSG00000032269	-9.18378	6.62376e-05	0.000732127	146.397	0	41.9942	0	4.66024	0	Htr3a
ENSMUSG00000039037	-9.18378	6.77259e-05	0.00074588	132.841	0	56.3607	0	3.72819	0	St6galnac5
ENSMUSG00000026824	-9.18367	0.000587011	0.0039852	103.02	0	89.514	0	0	0	Kcnj3
ENSMUSG00000060459	-9.18306	6.89941e-05	0.000754859	56.932	0	131.508	0	3.72819	0	Kng2
ENSMUSG00000021136	-9.18238	2.1962e-05	0.000303937	116.575	0	57.4658	0	18.6409	0	Smoc1
ENSMUSG00000106092	-9.18184	2.46323e-05	0.000333345	92.1757	0	86.1987	0	13.9807	0	Gm43072
ENSMUSG00000030862	-9.18167	9.5891e-05	0.000991382	116.575	0	74.0425	0	1.86409	0	Cpxm2
ENSMUSG00000031111	-9.18061	0.000603046	0.00405206	119.286	0	72.9374	0	0	0	Igsf1
ENSMUSG00000025141	-9.17959	0.00061149	0.00410043	124.708	0	67.4118	0	0	0	Myadml2
ENSMUSG00000105782	-9.1781	3.96413e-05	0.000488182	149.108	0	14.3664	0	28.8935	0	Gm42955
ENSMUSG00000069430	-9.17549	7.8635e-05	0.000843234	119.286	0	69.622	0	2.79614	0	Olfr9
ENSMUSG00000106536	-9.17534	0.000604614	0.00405961	103.02	0	88.4089	0	0	0	Gm42508
ENSMUSG00000022149	-9.17514	0.000112203	0.00111382	162.663	0	26.5227	0	2.79614	0	C9
ENSMUSG00000034040	-9.17298	0.000132987	0.00126811	159.952	0	29.838	0	1.86409	0	Galnt17
ENSMUSG00000071424	-9.1721	1.50988e-07	5.6735e-06	216.884	0	107.196	0.524192	48.4664	0	Grid2
ENSMUSG00000013936	-9.1702	0.000641451	0.00425224	130.13	0	60.7811	0	0	0	Myl2
ENSMUSG00000109369	-9.16857	0.000627297	0.00418129	116.575	0	74.0425	0	0	0	Vmn2r-ps88
ENSMUSG00000087518	-9.16852	2.2748e-05	0.000311291	124.708	0	41.9942	0	24.2332	0	Gm13561
ENSMUSG00000015970	-9.16807	1.48841e-05	0.00022408	97.5978	0	34.2585	0	58.719	0	Chdh
ENSMUSG00000047286	-9.16691	0.000838209	0.00526739	170.796	0	19.892	0	0	0	Olfr370
ENSMUSG00000038984	-9.16522	0.000207771	0.00179302	165.374	0	24.3125	0	0.932047	0	Tspyl5
ENSMUSG00000073628	-9.16287	0.000107633	0.00108057	168.085	0	17.6818	0	4.66024	0	Gm10552
ENSMUSG00000099954	-9.16287	5.45339e-05	0.000625383	119.286	0	65.2016	0	5.59228	0	Gm28112
ENSMUSG00000058656	-9.16135	0.000148981	0.00138603	100.309	0	88.4089	0	0.932047	0	Samd12
ENSMUSG00000080051	-9.16118	0.000639685	0.00424228	111.153	0	78.4629	0	0	0	Gm14510
ENSMUSG00000051896	-9.1606	0.000636473	0.00422708	92.1757	0	97.2498	0	0	0	Tex37
ENSMUSG00000019892	-9.15974	0.000692386	0.00452469	140.975	0	48.6249	0	0	0	Lrriq1
ENSMUSG00000055216	-9.15872	0.000712557	0.00462519	146.397	0	43.0993	0	0	0	9430025C20Rik
ENSMUSG00000063796	-9.15871	0.00015867	0.00145238	176.218	0	9.946	0	3.72819	0	Slc22a8
ENSMUSG00000085177	-9.15852	0.000641651	0.00425224	103.02	0	86.1987	0	0	0	Gm11209
ENSMUSG00000104086	-9.15811	3.32957e-05	0.000427851	116.575	0	60.7811	0	12.1166	0	1700039M15Rik
ENSMUSG00000097409	-9.1567	0.000768325	0.00491069	157.241	0	32.0482	0	0	0	Gm26832
ENSMUSG00000052392	-9.15619	0.000104176	0.00105622	97.5978	0	89.514	0	1.86409	0	Acot4
ENSMUSG00000093482	-9.15571	0.000807226	0.00511122	162.663	0	26.5227	0	0	0	Gm20619
ENSMUSG00000044937	-9.15512	0.000152896	0.00141456	89.4646	0	98.3549	0	0.932047	0	Ttc41
ENSMUSG00000030226	-9.15488	3.29652e-06	6.68812e-05	249.416	0	114.932	0	3.72819	0.597985	Lmo3
ENSMUSG00000061742	-9.15484	0.000275407	0.00222375	176.218	0	12.1562	0	0.932047	0	Slc22a12
ENSMUSG00000111368	-9.15472	1.55559e-05	0.000232261	97.5978	0	53.0454	0	38.2139	0	Gm47889
ENSMUSG00000106570	-9.15396	3.73758e-08	1.85048e-06	493.411	0	127.088	1.04838	24.2332	0	C230071H17Rik
ENSMUSG00000109515	-9.1534	5.63148e-07	1.62579e-05	241.283	0.686007	106.091	0	20.505	0	Gm31343
ENSMUSG00000085760	-9.15328	3.47998e-05	0.000442527	119.286	0	57.4658	0	12.1166	0	Gm14302
ENSMUSG00000062064	-9.15276	8.42446e-07	2.28858e-05	246.705	0.686007	106.091	0	14.9128	0	Slc2a7
ENSMUSG00000021490	-9.15257	4.94019e-07	1.47298e-05	235.861	0	109.406	0.524192	22.3691	0	Slc34a1
ENSMUSG00000097304	-9.15055	6.42925e-05	0.000715805	157.241	0	11.0511	0	20.505	0	Rpl31-ps15
ENSMUSG00000026770	-9.14967	4.06574e-05	0.000497686	84.0425	0	8.84089	0	95.0688	0	Il2ra
ENSMUSG00000103560	-9.14917	4.74117e-05	0.000561258	146.397	0	13.2613	0	28.8935	0	Gm38070
ENSMUSG00000079163	-9.14869	1.05574e-07	4.33091e-06	187.062	0	114.932	0.524192	64.3112	0	Gm15498
ENSMUSG00000054746	-9.14782	5.71619e-05	0.000646225	151.819	0	25.4176	0	11.1846	0	Abca15
ENSMUSG00000103882	-9.14677	0.000677464	0.00444619	75.9094	0	111.616	0	0	0	Gm37452
ENSMUSG00000108150	-9.14455	0.000120705	0.00117984	132.841	0	53.0454	0	1.86409	0	Gm44470
ENSMUSG00000019278	-9.14429	4.05935e-05	0.000497237	241.283	0	123.772	0.524192	0	0	Dpep1
ENSMUSG00000051832	-9.14418	2.76503e-05	0.000366346	97.5978	0	74.0425	0	15.8448	0	E230016K23Rik
ENSMUSG00000036395	-9.1433	7.10475e-07	1.97394e-05	276.527	0	62.9914	0	26.0973	0.597985	Glb1l2
ENSMUSG00000053528	-9.14321	4.14712e-05	0.000506387	140.975	0	30.9431	0	15.8448	0	A530021J07Rik
ENSMUSG00000004359	-9.14281	2.50492e-06	5.38484e-05	189.773	0.686007	170.187	0	4.66024	0	Spic
ENSMUSG00000084292	-9.14105	0.000709294	0.00461127	127.419	0	59.676	0	0	0	Gm13535
ENSMUSG00000034584	-9.14038	7.78618e-08	3.40752e-06	574.742	0.686007	119.352	0	5.59228	0.597985	Exph5
ENSMUSG00000089773	-9.1396	0.00142606	0.00792892	184.351	0	0	0	2.79614	0	Skint1
ENSMUSG00000108841	-9.13885	2.05892e-05	0.000289673	111.153	0	37.5738	0	38.2139	0	Frmpd2
ENSMUSG00000085579	-9.13873	1.74509e-07	6.3116e-06	189.773	0.686007	129.298	0	44.7383	0	Gm12066
ENSMUSG00000036172	-9.13793	0.000762433	0.00488495	143.686	0	43.0993	0	0	0	Cd200r3
ENSMUSG00000103572	-9.13793	0.000762433	0.00488495	143.686	0	43.0993	0	0	0	Gm37115
ENSMUSG00000108334	-9.1369	0.000788281	0.00501551	149.108	0	37.5738	0	0	0	Gm30771
ENSMUSG00000062209	-9.13583	6.84726e-05	0.000751242	154.53	0	22.1022	0	10.2525	0	Erbb4
ENSMUSG00000030787	-9.13487	0.000861873	0.00538232	159.952	0	26.5227	0	0	0	Lyve1
ENSMUSG00000039706	-9.13487	0.000861873	0.00538232	159.952	0	26.5227	0	0	0	Ldb2
ENSMUSG00000049041	-9.13487	0.000861873	0.00538232	159.952	0	26.5227	0	0	0	Olfr398
ENSMUSG00000097196	-9.13427	0.000172171	0.00154533	162.663	0	22.1022	0	1.86409	0	Gm26665
ENSMUSG00000056553	-9.13348	3.44426e-07	1.09932e-05	225.017	0	106.091	0	31.6896	0.597985	Ptprn2
ENSMUSG00000042244	-9.13335	0.00010524	0.00106383	151.819	0	30.9431	0	3.72819	0	Pglyrp3
ENSMUSG00000031554	-9.13333	1.88503e-07	6.73798e-06	203.329	0	46.4147	0.524192	112.778	0	Adam5
ENSMUSG00000037529	-9.13107	0.000855501	0.00535221	157.241	0	28.7329	0	0	0	Prss40
ENSMUSG00000027457	-9.12995	3.14571e-07	1.02456e-05	295.504	0	329.323	1.04838	3.72819	0	Snph
ENSMUSG00000110225	-9.12908	0.000970259	0.00588348	168.085	0	17.6818	0	0	0	Gm45528
ENSMUSG00000035934	-9.12895	1.15543e-10	1.49205e-08	314.482	0.686007	277.383	0	93.2047	0.597985	Pknox2
ENSMUSG00000074892	-9.12812	3.49705e-05	0.000443775	124.708	0	44.2045	0	16.7768	0	B3galt5
ENSMUSG00000104401	-9.12703	0.000102119	0.0010395	154.53	0	26.5227	0	4.66024	0	Gm20750
ENSMUSG00000108930	-9.12695	0.000186195	0.00164622	170.796	0	12.1562	0	2.79614	0	Gm10648
ENSMUSG00000010461	-9.12637	4.80291e-05	0.000566372	138.263	0	34.2585	0	13.0487	0	Eya4
ENSMUSG00000106497	-9.12633	0.000271576	0.00219863	168.085	0	16.5767	0	0.932047	0	Gm43195
ENSMUSG00000029586	-9.12324	9.99337e-05	0.00102316	151.819	0	28.7329	0	4.66024	0	Spdye4b
ENSMUSG00000073538	-9.12048	1.59372e-05	0.000235488	51.5099	0	59.676	0	72.6997	0	E330020D12Rik
ENSMUSG00000096356	-9.11899	0.000289394	0.00231933	176.218	0	6.63067	0	1.86409	0	Olfr889
ENSMUSG00000108129	-9.11701	2.42205e-05	0.000328257	100.309	0	58.5709	0	25.1653	0	4930417O13Rik
ENSMUSG00000074764	-9.11601	3.60117e-05	0.000453534	130.13	0	29.838	0	24.2332	0	Sel1l2
ENSMUSG00000111110	-9.1153	0.000158353	0.00145113	149.108	0	33.1533	0	1.86409	0	Gm36855
ENSMUSG00000109155	-9.11449	1.94076e-05	0.00027566	94.8867	0	43.0993	0	45.6703	0	Gm18757
ENSMUSG00000021789	-9.11407	0.000797354	0.00506652	132.841	0	50.8351	0	0	0	Sftpa1
ENSMUSG00000096890	-9.11354	4.82666e-05	0.000567542	138.263	0	29.838	0	15.8448	0	Gm20797
ENSMUSG00000097083	-9.11302	3.20332e-05	0.000414825	108.442	0	57.4658	0	17.7089	0	D930019O06Rik
ENSMUSG00000086025	-9.11301	0.000818106	0.00516762	138.263	0	45.3096	0	0	0	4933406G16Rik
ENSMUSG00000024347	-9.11195	0.000843381	0.00529445	143.686	0	39.784	0	0	0	Psd2
ENSMUSG00000055833	-9.11069	0.000760057	0.00487825	105.731	0	77.3578	0	0	0	1700034H15Rik
ENSMUSG00000030757	-9.10912	2.43994e-05	0.000330437	108.442	0	36.4687	0	38.2139	0	Zkscan2
ENSMUSG00000060988	-9.10824	0.000201161	0.00174323	162.663	0	18.7869	0	1.86409	0	Galnt13
ENSMUSG00000036962	-9.10813	2.85211e-05	0.000376253	113.864	0	43.0993	0	26.0973	0	Cfap221
ENSMUSG00000105803	-9.10758	5.82209e-05	0.000657387	143.686	0	14.3664	0	25.1653	0	Gm43526
ENSMUSG00000040310	-9.10692	0.000107479	0.00108057	119.286	0	60.7811	0	2.79614	0	Alx4
ENSMUSG00000030617	-9.10642	1.99213e-07	7.03846e-06	211.462	0	83.9885	0.524192	60.5831	0	Ccdc83
ENSMUSG00000102080	-9.10636	8.0576e-05	0.000860025	111.153	0	4.42045	0	67.1074	0	Gm5092
ENSMUSG00000090147	-9.10531	0.000823794	0.00519356	132.841	0	49.73	0	0	0	Gm3329
ENSMUSG00000001986	-9.10451	2.07537e-05	0.000290949	89.4646	0	57.4658	0	35.4178	0	Gria3
ENSMUSG00000029788	-9.10297	0.00110563	0.00653578	168.085	0	14.3664	0	0	0	Cpa5
ENSMUSG00000106550	-9.10038	0.000848165	0.00532083	135.552	0	46.4147	0	0	0	Gm43646
ENSMUSG00000048218	-9.09963	3.78724e-05	0.000471464	100.309	0	14.3664	0	67.1074	0	Amigo2
ENSMUSG00000034898	-9.09946	0.000212684	0.00182498	162.663	0	17.6818	0	1.86409	0	Filip1
ENSMUSG00000108372	-9.09902	4.13433e-07	1.27844e-05	219.595	0	32.0482	0.524192	102.525	0	Gm45124
ENSMUSG00000054493	-9.09826	0.000903911	0.00557893	146.397	0	35.3636	0	0	0	Gm9947
ENSMUSG00000108237	-9.09696	0.000800008	0.00507428	108.442	0	72.9374	0	0	0	Gm19757
ENSMUSG00000029700	-9.09617	0.000992808	0.00599444	157.241	0	24.3125	0	0	0	Slc13a1
ENSMUSG00000103194	-9.09609	2.82596e-05	0.00037334	111.153	0	38.6789	0	31.6896	0	Gm37643
ENSMUSG00000020810	-9.09582	0.00972298	0.0380446	21.6884	0	633.229	0	0	1.19597	Cygb
ENSMUSG00000037996	-9.09449	0.000250606	0.00207747	151.819	0	28.7329	0	0.932047	0	Slc24a2
ENSMUSG00000083355	-9.09418	0.000801737	0.00508349	100.309	0	80.6731	0	0	0	Gm11581
ENSMUSG00000042254	-9.09337	1.83786e-09	1.60481e-07	154.53	0.686007	446.465	0.524192	52.1946	0	Cilp
ENSMUSG00000109464	-9.09252	4.88211e-05	0.000572399	119.286	0	49.73	0	12.1166	0	Gm34350
ENSMUSG00000085773	-9.09227	0.00098437	0.00595722	154.53	0	26.5227	0	0	0	Gm16233
ENSMUSG00000049409	-9.09134	6.02379e-05	0.000675585	138.263	0	29.838	0	13.0487	0	Prokr1
ENSMUSG00000020014	-9.09131	3.37484e-07	1.08001e-05	458.167	0	149.19	1.04838	5.59228	0	Cfap54
ENSMUSG00000039395	-9.09048	0.000903364	0.00557743	140.975	0	39.784	0	0	0	Mreg
ENSMUSG00000029423	-9.09024	0.00112798	0.00663365	165.374	0	15.4716	0	0	0	Piwil1
ENSMUSG00000085768	-9.0892	5.0183e-05	0.000585	233.15	0	118.247	0.524192	0	0	Gm13707
ENSMUSG00000110110	-9.08785	0.000233131	0.00196007	140.975	0	38.6789	0	0.932047	0	Gm30978
ENSMUSG00000081517	-9.08725	5.26811e-05	0.000607937	130.13	0	36.4687	0	13.9807	0	Gm16204
ENSMUSG00000023274	-9.0865	2.47574e-05	0.000334607	75.9094	0	75.1476	0	28.8935	0	Cd4
ENSMUSG00000102778	-9.0863	0.00110491	0.00653362	162.663	0	17.6818	0	0	0	Gm38165
ENSMUSG00000022821	-9.08574	0.000529354	0.00369219	176.218	0	3.31533	0	0.932047	0	Hgd
ENSMUSG00000046167	-9.08573	2.76955e-06	5.8441e-05	192.484	0	152.505	0.524192	5.59228	0	Gldn
ENSMUSG00000044667	-9.08459	0.000153773	0.00141909	127.419	0	50.8351	0	1.86409	0	Plppr4
ENSMUSG00000100217	-9.08397	0.000232527	0.0019559	138.263	0	40.8891	0	0.932047	0	9930111H07Rik
ENSMUSG00000104525	-9.08382	0.00216277	0.0110041	178.929	0	1.10511	0	0	0	Gm37334
ENSMUSG00000108356	-9.08266	0.000906616	0.00559187	135.552	0	44.2045	0	0	0	9130221F21Rik
ENSMUSG00000038094	-9.08142	3.85291e-05	0.00047834	121.997	0	29.838	0	27.9614	0	Atp13a4
ENSMUSG00000029212	-9.08071	7.17029e-06	0.000125821	162.663	0	184.554	0	1.86409	0.597985	Gabrb1
ENSMUSG00000054141	-9.07899	0.000154486	0.00142209	162.663	0	7.73578	0	9.32047	0	Olfr24
ENSMUSG00000019789	-9.07838	2.63545e-05	0.000352747	94.8867	0	32.0482	0	52.1946	0	Hey2
ENSMUSG00000078531	-9.07768	2.06558e-05	0.000290019	70.4873	0	48.6249	0	59.651	0	Gm831
ENSMUSG00000102212	-9.07688	5.22251e-09	3.72627e-07	482.567	1.37201	149.19	0	53.1267	0	C230085N15Rik
ENSMUSG00000106047	-9.07551	0.00100856	0.00606557	149.108	0	29.838	0	0	0	Gm42942
ENSMUSG00000106805	-9.07241	0.00123491	0.00711871	165.374	0	13.2613	0	0	0	Gm42714
ENSMUSG00000009670	-9.07172	8.29402e-05	0.000882689	138.263	0	32.0482	0	8.38842	0	Tex11
ENSMUSG00000069378	-9.07123	3.59675e-05	0.000453289	113.864	0	37.5738	0	27.0294	0	Prdm6
ENSMUSG00000097344	-9.07049	0.00105229	0.00627003	151.819	0	26.5227	0	0	0	Gm26732
ENSMUSG00000086761	-9.0698	6.35883e-05	0.000709257	138.263	0	18.7869	0	21.4371	0	Cep112os1
ENSMUSG00000097203	-9.06959	6.60987e-05	0.000731032	135.552	0	29.838	0	13.0487	0	4732419C18Rik
ENSMUSG00000020062	-9.06757	0.00015169	0.00140624	103.02	0	72.9374	0	1.86409	0	Slc5a8
ENSMUSG00000027485	-9.06648	5.96149e-05	0.000669828	119.286	0	11.0511	0	47.5344	0	Bpifb1
ENSMUSG00000062296	-9.06623	0.000124771	0.00121119	135.552	0	38.6789	0	3.72819	0	Trank1
ENSMUSG00000008489	-9.06591	0.000105723	0.00106695	130.13	0	43.0993	0	4.66024	0	Elavl2
ENSMUSG00000083204	-9.06249	0.00150041	0.00823987	170.796	0	6.63067	0	0	0	Gm13788
ENSMUSG00000075067	-9.06245	0.000155832	0.00143251	105.731	0	69.622	0	1.86409	0	Olfr1267-ps1
ENSMUSG00000095987	-9.06184	0.000948263	0.00577301	127.419	0	49.73	0	0	0	Gm13104
ENSMUSG00000101387	-9.0605	0.000234948	0.00196993	121.997	0	54.1505	0	0.932047	0	Pced1c-ps
ENSMUSG00000106501	-9.06042	0.00116157	0.00678117	157.241	0	19.892	0	0	0	Gm42711
ENSMUSG00000071102	-9.05965	0.00100211	0.0060347	138.263	0	38.6789	0	0	0	Gm10313
ENSMUSG00000058755	-9.05851	1.08602e-17	6.86702e-15	607.275	0.686007	2557.23	0	378.411	5.97985	Osm
ENSMUSG00000043948	-9.05814	0.00025118	0.00208035	132.841	0	43.0993	0	0.932047	0	Olfr691
ENSMUSG00000108077	-9.05713	0.000226152	0.00191192	75.9094	0	99.46	0	0.932047	0	6330415B21Rik
ENSMUSG00000021904	-9.05664	0.000909429	0.00560356	86.7536	0	89.514	0	0	0	Sema3g
ENSMUSG00000084927	-9.05653	6.79392e-05	0.000747331	130.13	0	12.1562	0	34.4857	0	Gm5724
ENSMUSG00000108890	-9.05629	9.91212e-05	0.00101655	103.02	0	4.42045	0	68.9715	0	Gm44847
ENSMUSG00000002266	-9.055	0.000941177	0.00573749	116.575	0	59.676	0	0	0	Zim1
ENSMUSG00000080917	-9.05407	0.000202956	0.00175796	143.686	0	30.9431	0	1.86409	0	Gm15925
ENSMUSG00000111645	-9.05366	4.9009e-05	0.000573503	100.309	0	61.8862	0	13.9807	0	Gm32171
ENSMUSG00000003505	-9.05348	0.00108007	0.00640347	146.397	0	29.838	0	0	0	Psg18
ENSMUSG00000105129	-9.05326	0.000925845	0.00567421	103.02	0	72.9374	0	0	0	Gm19566
ENSMUSG00000054672	-9.0526	0.000237719	0.00198771	116.575	0	58.5709	0	0.932047	0	5830411N06Rik
ENSMUSG00000016626	-9.05184	0.000274556	0.00221785	140.975	0	34.2585	0	0.932047	0	Nlrp14
ENSMUSG00000035551	-9.05166	0.00100588	0.00605344	132.841	0	43.0993	0	0	0	Igfbpl1
ENSMUSG00000030235	-9.05129	0.000183892	0.00162979	149.108	0	24.3125	0	2.79614	0	Slco1c1
ENSMUSG00000087247	-9.04989	0.000964878	0.0058586	119.286	0	56.3607	0	0	0	Alkal1
ENSMUSG00000102306	-9.04933	0.000135429	0.00128872	143.686	0	27.6278	0	4.66024	0	NA
ENSMUSG00000100733	-9.04903	0.000261325	0.00214414	132.841	0	41.9942	0	0.932047	0	4932411K12Rik
ENSMUSG00000099052	-9.04752	7.26465e-05	0.000789165	132.841	0	29.838	0	13.0487	0	Gm27793
ENSMUSG00000022455	-9.04688	0.000146784	0.00137046	140.975	0	30.9431	0	3.72819	0	Wbp2nl
ENSMUSG00000103599	-9.04618	3.61604e-05	0.000454733	89.4646	0	23.2073	0	62.4472	0	Gm37356
ENSMUSG00000100437	-9.04583	9.00685e-07	2.41814e-05	197.907	0	123.772	0	19.573	0.597985	Gm29152
ENSMUSG00000026220	-9.04451	8.56076e-05	0.000905298	111.153	0	57.4658	0	6.52433	0	Slc16a14
ENSMUSG00000052133	-9.04447	0.000165332	0.00149861	138.263	0	34.2585	0	2.79614	0	Sema5b
ENSMUSG00000110924	-9.04447	0.000165332	0.00149861	138.263	0	34.2585	0	2.79614	0	Gm40518
ENSMUSG00000103192	-9.04331	0.000188785	0.00166307	130.13	0	43.0993	0	1.86409	0	Gm37645
ENSMUSG00000009394	-9.04141	0.00107421	0.00637996	138.263	0	36.4687	0	0	0	Syn2
ENSMUSG00000025726	-9.04128	5.54284e-05	0.000631299	121.997	0	34.2585	0	18.6409	0	Slc28a1
ENSMUSG00000079620	-9.03952	0.000100479	0.00102588	119.286	0	49.73	0	5.59228	0	Muc4
ENSMUSG00000044938	-9.03704	0.000111564	0.0011082	130.13	0	38.6789	0	5.59228	0	Klhl31
ENSMUSG00000032493	-9.03408	0.00122652	0.00707391	151.819	0	22.1022	0	0	0	Prss44
ENSMUSG00000076577	-9.0338	0.000997689	0.00601599	108.442	0	65.2016	0	0	0	Igkv8-30
ENSMUSG00000039106	-9.03332	0.00010803	0.00108367	132.841	0	6.63067	0	34.4857	0	Htr5a
ENSMUSG00000028976	-9.03305	0.000263328	0.00214926	121.997	0	50.8351	0	0.932047	0	Slc2a5
ENSMUSG00000060918	-9.032	0.00145183	0.00804295	162.663	0	11.0511	0	0	0	Olfr51
ENSMUSG00000001763	-9.03112	0.000706259	0.00460013	170.796	0	1.10511	0	1.86409	0	Tspan33
ENSMUSG00000022759	-9.03012	0.000382582	0.00286928	157.241	0	15.4716	0	0.932047	0	Lrrc74b
ENSMUSG00000031491	-9.02995	8.67771e-05	0.000916081	94.8867	0	71.8322	0	6.52433	0	Chrna6
ENSMUSG00000096409	-9.02893	0.00129413	0.00737885	154.53	0	18.7869	0	0	0	Olfr890
ENSMUSG00000028347	-9.02844	5.13485e-05	0.000595935	97.5978	0	59.676	0	15.8448	0	Tmeff1
ENSMUSG00000047712	-9.02721	1.04139e-05	0.000167225	97.5978	0	236.494	0	1.86409	0.597985	Ust
ENSMUSG00000026678	-9.02712	7.01415e-06	0.000123434	216.884	0.686007	117.142	0	2.79614	0	Rgs5
ENSMUSG00000006542	-9.02703	0.00115423	0.00675338	140.975	0	32.0482	0	0	0	Prkag3
ENSMUSG00000104109	-9.0269	0.00160108	0.00867584	165.374	0	7.73578	0	0	0	Gm30292
ENSMUSG00000050366	-9.0267	0.000255293	0.00210688	157.241	0	13.2613	0	2.79614	0	Olfr524
ENSMUSG00000018634	-9.02564	0.000149373	0.00138897	132.841	0	36.4687	0	3.72819	0	Crhr1
ENSMUSG00000075161	-9.02421	0.00029911	0.00238364	162.663	0	6.63067	0	3.72819	0	Olfr1109
ENSMUSG00000078091	-9.02377	0.0013747	0.00772301	157.241	0	15.4716	0	0	0	Gm10912
ENSMUSG00000044294	-9.02335	0.000102153	0.0010395	140.975	0	13.2613	0	18.6409	0	Krt84
ENSMUSG00000103351	-9.02094	2.91474e-05	0.000383137	56.932	0	48.6249	0	66.1753	0	Gm6350
ENSMUSG00000039342	-9.01899	6.81158e-05	0.000748824	124.708	0	29.838	0	17.7089	0	Ankar
ENSMUSG00000089251	-9.01885	0.00115262	0.00674614	135.552	0	36.4687	0	0	0	Gm25714
ENSMUSG00000057337	-9.01785	0.000354519	0.00269967	149.108	0	22.1022	0	0.932047	0	Chst3
ENSMUSG00000028766	-9.01781	2.34846e-06	5.13274e-05	233.15	0.686007	90.6191	0	11.1846	0	Alpl
ENSMUSG00000024481	-9.01773	0.00119672	0.006939	140.975	0	30.9431	0	0	0	Lvrn
ENSMUSG00000060508	-9.01773	0.00119672	0.006939	140.975	0	30.9431	0	0	0	Nlrp9b
ENSMUSG00000103348	-9.01764	0.00170307	0.00910736	165.374	0	6.63067	0	0	0	Gm37053
ENSMUSG00000029184	-9.01757	0.00014781	0.00137654	127.419	0	40.8891	0	3.72819	0	Olfr109
ENSMUSG00000106386	-9.01755	0.00104097	0.0062197	97.5978	0	74.0425	0	0	0	Gm42991
ENSMUSG00000105028	-9.01703	0.00109374	0.00647593	121.997	0	49.73	0	0	0	Gm18747
ENSMUSG00000106643	-9.01515	3.94367e-05	0.000486642	94.8867	0	30.9431	0	45.6703	0	Gm43422
ENSMUSG00000018844	-9.01492	0.000325414	0.00253166	140.975	0	29.838	0	0.932047	0	Fndc8
ENSMUSG00000105290	-9.01431	4.7942e-05	0.000566073	100.309	0	49.73	0	21.4371	0	Gm43528
ENSMUSG00000074195	-9.01362	0.00119455	0.00693177	138.263	0	33.1533	0	0	0	Clca4b
ENSMUSG00000104932	-9.01348	0.000187425	0.0016547	78.6204	0	90.6191	0	1.86409	0	Gm40323
ENSMUSG00000086838	-9.01178	0.00112513	0.00662299	124.708	0	46.4147	0	0	0	Gm16212
ENSMUSG00000052430	-9.0102	0.000107625	0.00108057	105.731	0	59.676	0	5.59228	0	Bmpr1b
ENSMUSG00000026668	-9.00882	0.00110803	0.00654573	116.575	0	54.1505	0	0	0	Ucma
ENSMUSG00000089893	-9.00735	0.000199838	0.00173505	138.263	0	29.838	0	2.79614	0	Gm9141
ENSMUSG00000109930	-9.00564	8.72099e-05	0.00092012	105.731	0	56.3607	0	8.38842	0	Gm34730
ENSMUSG00000086126	-9.00383	8.97564e-05	0.000942337	127.419	0	30.9431	0	12.1166	0	Evx1os
ENSMUSG00000035454	-9.00179	0.000115929	0.00114289	135.552	0	25.4176	0	9.32047	0	Samt3
ENSMUSG00000015365	-9.00163	0.000174334	0.00155939	135.552	0	30.9431	0	3.72819	0	Mov10l1
ENSMUSG00000058297	-9.00141	0.000166604	0.00150791	143.686	0	20.9971	0	5.59228	0	Spock2
ENSMUSG00000029811	-9.00092	0.00147033	0.00812336	154.53	0	15.4716	0	0	0	Aoc1
ENSMUSG00000030519	-9.00015	3.4619e-05	0.000441452	65.0652	0	65.2016	0	39.146	0	Apba2
ENSMUSG00000110613	-9.00009	0.00123717	0.00712723	135.552	0	34.2585	0	0	0	Lncbate1
ENSMUSG00000106045	-8.99877	0.00110933	0.00655129	97.5978	0	71.8322	0	0	0	Gm42996
ENSMUSG00000074783	-8.99738	0.000216765	0.00185047	130.13	0	2.21022	0	37.2819	0	AU019990
ENSMUSG00000092019	-8.99659	6.86472e-05	0.000751962	105.731	0	49.73	0	13.9807	0	Gm4027
ENSMUSG00000086396	-8.99612	0.000127127	0.00122885	140.975	0	16.5767	0	12.1166	0	4930555B11Rik
ENSMUSG00000087579	-8.99609	0.000355268	0.00270426	140.975	0	27.6278	0	0.932047	0	Hectd2os
ENSMUSG00000085162	-8.99567	0.00157762	0.00856898	157.241	0	12.1562	0	0	0	Gm12295
ENSMUSG00000052469	-8.99565	0.000132673	0.00126766	113.864	0	50.8351	0	4.66024	0	Tcp10c
ENSMUSG00000050272	-8.99563	1.45443e-06	3.54181e-05	246.705	0.686007	56.3607	0	27.0294	0	Dscam
ENSMUSG00000036815	-8.99379	0.000111436	0.00110754	121.997	0	39.784	0	7.45638	0	Dpp10
ENSMUSG00000072983	-8.99366	0.00134352	0.00759019	143.686	0	25.4176	0	0	0	4933414I15Rik
ENSMUSG00000062826	-8.99309	0.000289575	0.00231976	146.397	0	20.9971	0	1.86409	0	Ces2f
ENSMUSG00000086278	-8.99258	0.000233411	0.00196063	127.419	0	39.784	0	1.86409	0	Olfr75-ps1
ENSMUSG00000110401	-8.99141	0.000246896	0.00205136	146.397	0	19.892	0	2.79614	0	Gm5740
ENSMUSG00000021200	-8.98897	5.13135e-05	0.000595906	75.9094	0	71.8322	0	20.505	0	Asb2
ENSMUSG00000098354	-8.98875	0.00120998	0.00700386	121.997	0	46.4147	0	0	0	Rpap3-ps2
ENSMUSG00000095279	-8.98813	8.04269e-05	0.000859935	121.997	0	29.838	0	16.7768	0	Gm10067
ENSMUSG00000106290	-8.98755	1.35415e-08	8.38888e-07	384.969	0	133.718	1.04838	58.719	0	Gm43429
ENSMUSG00000022181	-8.98477	3.36981e-06	6.79851e-05	105.731	0	212.181	0	8.38842	0.597985	C6
ENSMUSG00000009114	-8.98457	0.00121673	0.00702934	119.286	0	48.6249	0	0	0	2610028H24Rik
ENSMUSG00000078452	-8.98393	0.00116982	0.00682499	100.309	0	67.4118	0	0	0	Raet1d
ENSMUSG00000053914	-8.98326	0.000132969	0.00126811	119.286	0	43.0993	0	5.59228	0	Kdm4d
ENSMUSG00000089410	-8.98184	9.77472e-05	0.00100689	127.419	0	26.5227	0	13.9807	0	Gm22014
ENSMUSG00000098227	-8.98123	0.000100074	0.00102403	108.442	0	50.8351	0	8.38842	0	Gm4812
ENSMUSG00000104284	-8.97921	0.000332572	0.00257259	132.841	0	1.10511	0	33.5537	0	Gm10862
ENSMUSG00000081017	-8.97881	0.00146458	0.00810232	146.397	0	20.9971	0	0	0	Gm15000
ENSMUSG00000047868	-8.97803	0.00128564	0.00734188	127.419	0	39.784	0	0	0	Olfr770
ENSMUSG00000046242	-8.97705	0.00021669	0.00185047	92.1757	0	72.9374	0	1.86409	0	Nme9
ENSMUSG00000099465	-8.97628	5.68079e-06	0.000104169	235.861	0	83.9885	0	5.59228	0.597985	Gm3830
ENSMUSG00000094985	-8.97571	0.001382	0.00774501	138.263	0	28.7329	0	0	0	Topaz1
ENSMUSG00000034224	-8.97533	0.000157655	0.0014469	105.731	0	57.4658	0	3.72819	0	Slc38a8
ENSMUSG00000061923	-8.975	0.0012586	0.0072294	119.286	0	47.5198	0	0	0	Odf1
ENSMUSG00000081313	-8.97475	4.8283e-05	0.000567542	84.0425	0	27.6278	0	54.9908	0	Gm14213
ENSMUSG00000105687	-8.97457	0.00145117	0.00804174	143.686	0	23.2073	0	0	0	Gm6157
ENSMUSG00000106669	-8.97394	6.46176e-05	0.000717682	105.731	0	20.9971	0	40.078	0	Gm38433
ENSMUSG00000075046	-8.97309	7.87555e-08	3.43843e-06	460.878	1.37201	166.872	0	14.9128	0	Duxf3
ENSMUSG00000084774	-8.9723	0.000276303	0.00222717	146.397	0	17.6818	0	2.79614	0	Gm14110
ENSMUSG00000109532	-8.97184	0.000235457	0.00197329	113.864	0	50.8351	0	1.86409	0	Gm42397
ENSMUSG00000075119	-8.97134	0.00121126	0.00700657	92.1757	0	74.0425	0	0	0	Olfr1197
ENSMUSG00000104528	-8.97117	0.000673928	0.00443091	162.663	0	2.21022	0	1.86409	0	Gm43314
ENSMUSG00000032936	-8.97028	0.000110097	0.00109959	113.864	0	44.2045	0	8.38842	0	Camkv
ENSMUSG00000102715	-8.97002	5.65996e-05	0.000641848	46.0878	0	25.4176	0	94.1368	0	Gm6209
ENSMUSG00000040896	-8.9687	7.52128e-05	0.000813194	181.64	0	141.454	0.524192	0	0	Kcnd3
ENSMUSG00000103492	-8.96862	0.000192948	0.00169206	140.975	0	19.892	0	5.59228	0	Gm37412
ENSMUSG00000106351	-8.96774	0.00125309	0.00720538	108.442	0	57.4658	0	0	0	Gm8896
ENSMUSG00000101394	-8.96689	0.000347107	0.0026598	121.997	0	43.0993	0	0.932047	0	Gm28183
ENSMUSG00000109921	-8.96678	0.000334789	0.00258485	149.108	0	2.21022	0	14.9128	0	Gm33326
ENSMUSG00000017692	-8.96609	3.03053e-06	6.29342e-05	189.773	0	123.772	0	9.32047	0.597985	Rhbdl3
ENSMUSG00000025955	-8.96555	8.38356e-05	0.000890668	233.15	0.686007	89.514	0	0	0	Akr1cl
ENSMUSG00000046709	-8.96544	1.9231e-06	4.44562e-05	208.751	0	98.3549	0	15.8448	0.597985	Mapk10
ENSMUSG00000070547	-8.96464	0.000197842	0.00172343	130.13	0	32.0482	0	3.72819	0	Mrgprb1
ENSMUSG00000087989	-8.96331	6.23117e-05	0.000696288	103.02	0	36.4687	0	26.0973	0	Gm22228
ENSMUSG00000102542	-8.96315	9.40794e-05	0.000977691	78.6204	0	77.3578	0	9.32047	0	Gm38133
ENSMUSG00000055403	-8.9624	0.000171617	0.00154262	140.975	0	15.4716	0	9.32047	0	4933427D06Rik
ENSMUSG00000021373	-8.9618	0.000196412	0.00171487	108.442	0	54.1505	0	2.79614	0	Cap2
ENSMUSG00000104180	-8.96173	0.0020722	0.0106526	159.952	0	5.52556	0	0	0	Gm37970
ENSMUSG00000029436	-8.96085	1.89949e-08	1.09188e-06	409.368	0	144.77	0	43.8062	1.19597	Mmp17
ENSMUSG00000058550	-8.9601	0.000330765	0.00256241	143.686	0	19.892	0	1.86409	0	Dppa4
ENSMUSG00000104764	-8.96006	0.00143633	0.00797156	140.975	0	0	0	24.2332	0	Gm43066
ENSMUSG00000030351	-8.95873	0.00137914	0.0077359	127.419	0	37.5738	0	0	0	Tspan11
ENSMUSG00000107797	-8.95873	0.00137914	0.0077359	127.419	0	37.5738	0	0	0	Gm10445
ENSMUSG00000105857	-8.95788	0.000442113	0.00321452	154.53	0	8.84089	0	1.86409	0	Gm42817
ENSMUSG00000082977	-8.95565	0.00134748	0.00760969	119.286	0	45.3096	0	0	0	Gm11911
ENSMUSG00000100530	-8.95539	0.000526273	0.00367629	151.819	0	12.1562	0	0.932047	0	Gm18117
ENSMUSG00000026188	-8.95531	0.000136742	0.00129651	121.997	0	35.3636	0	7.45638	0	Tmem169
ENSMUSG00000083722	-8.9545	8.79396e-05	0.000926219	81.3315	0	71.8322	0	11.1846	0	Adgrd2-ps
ENSMUSG00000073907	-8.95445	0.00138296	0.00774804	124.708	0	39.784	0	0	0	Olfr689
ENSMUSG00000100843	-8.95441	0.000118984	0.00116737	127.419	0	24.3125	0	13.0487	0	Gm8307
ENSMUSG00000102623	-8.95347	5.48536e-05	0.000626805	67.7762	0	25.4176	0	70.8356	0	Gm37673
ENSMUSG00000097228	-8.95344	0.000420777	0.00308632	138.263	0	25.4176	0	0.932047	0	Gm26597
ENSMUSG00000107254	-8.95262	1.44994e-06	3.53558e-05	355.147	1.37201	284.014	0	0.932047	0	Gm43769
ENSMUSG00000044117	-8.95191	1.98338e-05	0.000280627	143.686	0	174.608	0.524192	0.932047	0	2900011O08Rik
ENSMUSG00000004730	-8.95183	1.09398e-13	2.95004e-11	455.456	3.43003	991.285	0	154.72	0	Adgre1
ENSMUSG00000035506	-8.95093	0.00155711	0.00847765	140.975	0	23.2073	0	0	0	Slc12a8
ENSMUSG00000101088	-8.94898	0.00142892	0.00794005	127.419	0	36.4687	0	0	0	1810018F18Rik
ENSMUSG00000035860	-8.94821	0.00012809	0.00123555	111.153	0	45.3096	0	7.45638	0	Cdhr3
ENSMUSG00000039488	-8.94816	0.000242382	0.00201934	138.263	0	22.1022	0	3.72819	0	Cntn5
ENSMUSG00000070111	-8.94718	0.00127549	0.00730442	105.731	0	0	0	57.7869	0	Gm10286
ENSMUSG00000099398	-8.94705	0.00131846	0.00749197	70.4873	0	92.8294	0	0	0	Ms4a14
ENSMUSG00000110928	-8.94644	8.3642e-05	0.000889642	108.442	0	37.5738	0	17.7089	0	Gm48114
ENSMUSG00000074577	-8.94489	0.000413177	0.00304487	132.841	0	29.838	0	0.932047	0	Ripor3
ENSMUSG00000025202	-8.94331	9.01641e-05	0.000945305	113.864	0	18.7869	0	30.7576	0	Scd3
ENSMUSG00000102246	-8.94324	1.4633e-06	3.5587e-05	200.618	0	95.0396	0.524192	22.3691	0	9430037O13Rik
ENSMUSG00000025557	-8.94302	0.000309478	0.00244292	132.841	0	28.7329	0	1.86409	0	Slc15a1
ENSMUSG00000100255	-8.94218	5.45073e-05	0.000625383	73.1983	0	60.7811	0	28.8935	0	Gm28196
ENSMUSG00000073969	-8.94157	0.00140236	0.00782328	116.575	0	46.4147	0	0	0	Olfr556
ENSMUSG00000085058	-8.94157	0.00140236	0.00782328	116.575	0	46.4147	0	0	0	8030453O22Rik
ENSMUSG00000073293	-8.94153	0.00133842	0.0075772	73.1983	0	89.514	0	0	0	Nudt10
ENSMUSG00000076586	-8.94036	0.0014374	0.00797507	121.997	0	40.8891	0	0	0	Igkv8-21
ENSMUSG00000105589	-8.93873	0.000306774	0.0024247	130.13	0	30.9431	0	1.86409	0	Fbxw14
ENSMUSG00000040452	-8.93823	0.000159298	0.00145688	132.841	0	19.892	0	10.2525	0	Cdh12
ENSMUSG00000022987	-8.93793	0.000928158	0.00568422	159.952	0	1.10511	0	1.86409	0	Zfp641
ENSMUSG00000081978	-8.93679	0.0016081	0.008701	138.263	0	24.3125	0	0	0	Gm14895
ENSMUSG00000091378	-8.93679	0.0016081	0.008701	138.263	0	24.3125	0	0	0	Gm4219
ENSMUSG00000023349	-8.93528	1.00746e-21	1.23159e-18	479.856	1.37201	4086.7	8.38706	897.561	1.19597	Clec4n
ENSMUSG00000042581	-8.93494	0.000195253	0.00170782	124.708	0	33.1533	0	4.66024	0	Thsd7b
ENSMUSG00000050050	-8.93466	0.000147334	0.00137349	127.419	0	9.946	0	25.1653	0	Ccdc158
ENSMUSG00000059401	-8.93315	0.000324566	0.00252936	132.841	0	27.6278	0	1.86409	0	Mamld1
ENSMUSG00000029875	-8.9329	6.82195e-05	0.000749515	97.5978	0	30.9431	0	33.5537	0	Ccdc184
ENSMUSG00000089713	-8.93257	0.00273381	0.0133041	159.952	0	2.21022	0	0	0	Gm16564
ENSMUSG00000025927	-8.93238	0.000223415	0.00189784	108.442	0	50.8351	0	2.79614	0	Tfap2b
ENSMUSG00000097834	-8.93126	0.00168556	0.00904273	140.975	0	20.9971	0	0	0	Gm26911
ENSMUSG00000059631	-8.93002	0.000218649	0.00186309	140.975	0	9.946	0	11.1846	0	1500035N22Rik
ENSMUSG00000058981	-8.92946	0.000455898	0.00328996	135.552	0	25.4176	0	0.932047	0	Olfr1406
ENSMUSG00000051111	-8.92928	0.00153511	0.00839527	127.419	0	34.2585	0	0	0	Sv2c
ENSMUSG00000097673	-8.92883	0.000321438	0.00251245	130.13	0	29.838	0	1.86409	0	Gm26608
ENSMUSG00000047759	-8.92864	0.00036831	0.00278618	97.5978	0	62.9914	0	0.932047	0	Hs3st3a1
ENSMUSG00000022623	-8.92805	0.00022592	0.00191083	132.841	0	24.3125	0	4.66024	0	Shank3
ENSMUSG00000104413	-8.92689	0.00167198	0.00898565	138.263	0	23.2073	0	0	0	Gm37065
ENSMUSG00000103734	-8.92674	0.00023227	0.00195463	111.153	0	47.5198	0	2.79614	0	Gm37651
ENSMUSG00000099366	-8.92671	0.0014077	0.0078416	94.8867	0	66.3067	0	0	0	Gm2497
ENSMUSG00000073111	-8.92609	0.00140377	0.0078284	75.9094	0	85.0936	0	0	0	Olfr446
ENSMUSG00000049281	-8.92594	0.000636932	0.00422708	151.819	0	8.84089	0	0.932047	0	Scn3b
ENSMUSG00000097563	-8.92573	0.000138509	0.00130785	89.4646	0	65.2016	0	6.52433	0	Gm26638
ENSMUSG00000031492	-8.92507	0.0001073	0.00107989	86.7536	0	64.0965	0	10.2525	0	Chrnb3
ENSMUSG00000029168	-8.92239	0.000114016	0.001129	84.0425	0	67.4118	0	9.32047	0	Dpysl5
ENSMUSG00000105753	-8.92193	0.000198111	0.00172414	135.552	0	8.84089	0	16.7768	0	Gm43847
ENSMUSG00000021298	-8.92108	0.000178999	0.0015949	10.8442	0	130.403	0	18.6409	0	Gpr132
ENSMUSG00000020636	-8.92027	8.42693e-05	0.000894758	103.02	0	35.3636	0	22.3691	0	Allc
ENSMUSG00000105282	-8.92018	0.00188749	0.00988319	146.397	0	14.3664	0	0	0	Gm42981
ENSMUSG00000102516	-8.91987	0.00145776	0.00807339	103.02	0	57.4658	0	0	0	Gm38340
ENSMUSG00000055546	-8.91924	0.00143286	0.00795468	84.0425	0	76.2527	0	0	0	Timd4
ENSMUSG00000030156	-8.91894	5.37316e-09	3.77889e-07	94.8867	0	354.741	0	128.622	1.19597	Cd69
ENSMUSG00000110448	-8.91812	0.00165617	0.00891909	132.841	0	27.6278	0	0	0	Gm33242
ENSMUSG00000040026	-8.91782	0.000199188	0.00173105	100.309	0	56.3607	0	3.72819	0	Saa3
ENSMUSG00000038676	-8.9161	5.80659e-05	0.000656041	70.4873	0	35.3636	0	54.0587	0	Ucn
ENSMUSG00000042846	-8.91406	3.98481e-06	7.82329e-05	252.128	0.686007	327.113	0.524192	0	0	Lrrtm3
ENSMUSG00000102935	-8.91176	0.00155567	0.00847369	116.575	0	43.0993	0	0	0	Gm38355
ENSMUSG00000019828	-8.91145	0.000167321	0.00151364	119.286	0	33.1533	0	7.45638	0	Grm1
ENSMUSG00000043668	-8.91086	9.93977e-05	0.00101881	94.8867	0	14.3664	0	50.3305	0	Tox3
ENSMUSG00000111090	-8.90974	0.000273577	0.00221115	132.841	0	23.2073	0	3.72819	0	Gm30698
ENSMUSG00000083594	-8.90951	9.74444e-05	0.00100497	108.442	0	23.2073	0	27.9614	0	Gm13722
ENSMUSG00000092009	-8.90838	0.00028042	0.0022543	124.708	0	32.0482	0	2.79614	0	Myh15
ENSMUSG00000105912	-8.90572	0.00193645	0.0100992	143.686	0	15.4716	0	0	0	Gm10440
ENSMUSG00000085562	-8.90549	7.67069e-05	0.000825454	37.9547	0	90.6191	0	29.8255	0	2610028E06Rik
ENSMUSG00000055730	-8.90423	6.97581e-05	0.000762764	65.0652	0	67.4118	0	26.0973	0	Ces2a
ENSMUSG00000045350	-8.90421	0.000102635	0.00104382	97.5978	0	46.4147	0	14.9128	0	Fam186a
ENSMUSG00000110400	-8.90372	0.00012407	0.00120502	54.221	0	93.9345	0	10.2525	0	Gm45416
ENSMUSG00000089907	-8.90358	0.00254476	0.012517	154.53	0	4.42045	0	0	0	Gm16169
ENSMUSG00000106458	-8.90245	0.00179661	0.00948057	135.552	0	23.2073	0	0	0	Gm42633
ENSMUSG00000028011	-8.9018	0.000111402	0.00110754	235.861	0	72.9374	0.524192	0	0	Tdo2
ENSMUSG00000044548	-8.90134	8.46914e-05	0.000897161	97.5978	0	26.5227	0	34.4857	0	Dact1
ENSMUSG00000111067	-8.90073	0.000260608	0.0021433	135.552	0	17.6818	0	5.59228	0	Gm48714
ENSMUSG00000110534	-8.90064	0.000223526	0.00189784	108.442	0	46.4147	0	3.72819	0	Gm45708
ENSMUSG00000109574	-8.90045	0.00165619	0.00891909	121.997	0	36.4687	0	0	0	B230206I08Rik
ENSMUSG00000031233	-8.90001	0.000174013	0.00155828	111.153	0	40.8891	0	6.52433	0	Pgk2
ENSMUSG00000098016	-8.89936	0.000188362	0.00166137	119.286	0	6.63067	0	32.6216	0	Gm9211
ENSMUSG00000051758	-8.8984	0.000323652	0.00252437	138.263	0	16.5767	0	3.72819	0	4930544M13Rik
ENSMUSG00000096009	-8.898	0.00178727	0.00944474	132.841	0	25.4176	0	0	0	Olfr134
ENSMUSG00000104578	-8.89553	0.000103604	0.00105135	92.1757	0	50.8351	0	14.9128	0	Gm8929
ENSMUSG00000048938	-8.89541	0.000157034	0.00144193	103.02	0	47.5198	0	7.45638	0	Nr1h5
ENSMUSG00000063728	-8.89532	0.00157411	0.00855497	100.309	0	57.4658	0	0	0	Magea6
ENSMUSG00000044798	-8.89476	0.00171382	0.00915154	124.708	0	33.1533	0	0	0	Olfr923
ENSMUSG00000047798	-8.89459	3.2874e-18	2.41124e-15	284.66	4.11604	1137.16	0.524192	685.987	0	Cd300lf
ENSMUSG00000107050	-8.89449	0.00225245	0.0113752	149.108	0	8.84089	0	0	0	C030017G13Rik
ENSMUSG00000045680	-8.89342	0.00156057	0.00849394	86.7536	0	70.7271	0	0	0	Tcf21
ENSMUSG00000018620	-8.89263	9.42119e-05	0.000977955	100.309	0	33.1533	0	24.2332	0	Mmp20
ENSMUSG00000070424	-8.8921	7.79385e-06	0.000134699	143.686	0	158.031	0	4.66024	0.597985	Art5
ENSMUSG00000105598	-8.89182	0.000484964	0.00344815	124.708	0	32.0482	0	0.932047	0	Gm43186
ENSMUSG00000018924	-8.89137	0.000737412	0.00476796	149.108	0	7.73578	0	0.932047	0	Alox15
ENSMUSG00000085582	-8.89046	6.07421e-07	1.72955e-05	162.663	0.686007	78.4629	0	65.2433	0	3110099E03Rik
ENSMUSG00000044664	-8.89029	0.00171693	0.00916278	121.997	0	35.3636	0	0	0	Prss42
ENSMUSG00000086771	-8.89024	0.0015741	0.00855497	78.6204	0	78.4629	0	0	0	1700080G11Rik
ENSMUSG00000111305	-8.88905	0.00177768	0.00940215	127.419	0	29.838	0	0	0	Olfr966-ps1
ENSMUSG00000104994	-8.88834	0.00159869	0.00866798	65.0652	0	91.7243	0	0	0	Gm42989
ENSMUSG00000107341	-8.88706	0.00159671	0.00866237	70.4873	0	86.1987	0	0	0	1700065J11Rik
ENSMUSG00000075091	-8.88666	9.50449e-05	0.000984094	81.3315	0	17.6818	0	57.7869	0	Olfr1233
ENSMUSG00000096993	-8.88641	0.0016073	0.008701	94.8867	0	61.8862	0	0	0	Gm26787
ENSMUSG00000102508	-8.88583	0.000882974	0.00548107	151.819	0	4.42045	0	0.932047	0	Gm37367
ENSMUSG00000045589	-8.88582	0.00172202	0.00917809	119.286	0	37.5738	0	0	0	Frrs1l
ENSMUSG00000103025	-8.88582	0.00172202	0.00917809	119.286	0	37.5738	0	0	0	Gm37686
ENSMUSG00000099137	-8.88328	8.04759e-07	2.18944e-05	149.108	0	112.721	0.524192	42.8742	0	Gm10603
ENSMUSG00000021763	-8.88282	0.00041571	0.0030614	132.841	0	22.1022	0	1.86409	0	BC067074
ENSMUSG00000086628	-8.88259	0.00168776	0.00905192	111.153	0	45.3096	0	0	0	Gm16157
ENSMUSG00000082432	-8.88214	1.59008e-06	3.81142e-05	211.462	0	44.2045	0	49.3985	0.597985	Gm11231
ENSMUSG00000029671	-8.88078	3.26049e-07	1.05075e-05	355.147	0	164.662	1.04838	11.1846	0	Wnt16
ENSMUSG00000054758	-8.87995	0.000118715	0.00116535	108.442	0	26.5227	0	21.4371	0	NA
ENSMUSG00000103090	-8.87976	0.00228858	0.0115037	146.397	0	9.946	0	0	0	Gm19214
ENSMUSG00000050383	-8.87672	0.00010584	0.00106754	100.309	0	22.1022	0	33.5537	0	Svs3b
ENSMUSG00000109089	-8.87637	0.00204842	0.0105632	138.263	0	17.6818	0	0	0	4833411C07Rik
ENSMUSG00000034833	-8.87586	9.42832e-05	0.000977955	94.8867	0	32.0482	0	28.8935	0	Tespa1
ENSMUSG00000036634	-8.8749	0.00169054	0.00906151	56.932	0	98.3549	0	0	0	Mag
ENSMUSG00000108254	-8.87384	4.48876e-10	4.78549e-08	539.499	0	239.809	1.04838	29.8255	0.597985	Gm43908
ENSMUSG00000070337	-8.87365	4.11202e-05	0.000503017	260.261	0	41.9942	0.524192	0.932047	0	Gpr179
ENSMUSG00000068745	-8.87359	0.00171254	0.00914734	105.731	0	49.73	0	0	0	Mybphl
ENSMUSG00000047053	-8.87311	0.000459457	0.00330784	56.932	0	97.2498	0	0.932047	0	Teddm1a
ENSMUSG00000040413	-8.87232	0.00167654	0.00900142	67.7762	0	87.3038	0	0	0	Timd2
ENSMUSG00000085375	-8.87231	0.00174778	0.00926539	111.153	0	44.2045	0	0	0	Gm12506
ENSMUSG00000105119	-8.87231	0.00174778	0.00926539	111.153	0	44.2045	0	0	0	Gm43765
ENSMUSG00000106018	-8.87231	0.00174778	0.00926539	111.153	0	44.2045	0	0	0	Gm43527
ENSMUSG00000110333	-8.87127	0.000486364	0.00345275	138.263	0	15.4716	0	1.86409	0	Gm45861
ENSMUSG00000056145	-8.8704	8.92431e-05	0.000937794	24.3994	0	56.3607	0	73.6317	0	AI504432
ENSMUSG00000073209	-8.87036	0.00170107	0.00910201	97.5978	0	57.4658	0	0	0	Klf14
ENSMUSG00000054477	-8.8701	0.000316746	0.00248531	135.552	0	14.3664	0	5.59228	0	Kcnn2
ENSMUSG00000040855	-8.87002	5.43274e-06	0.000100221	225.017	0.686007	66.3067	0	11.1846	0	Reps2
ENSMUSG00000048215	-8.86951	0.000485677	0.00345054	111.153	0	43.0993	0	0.932047	0	A630023P12Rik
ENSMUSG00000073998	-8.86851	0.00191658	0.0100155	127.419	0	27.6278	0	0	0	Olfr520
ENSMUSG00000032818	-8.86816	0.000331207	0.00256368	138.263	0	7.73578	0	9.32047	0	Loxhd1
ENSMUSG00000067028	-8.86572	2.89563e-06	6.06133e-05	211.462	0.686007	69.622	0	20.505	0	Cntnap5b
ENSMUSG00000040717	-8.86549	7.15379e-05	0.000778973	287.371	0	13.2613	0.524192	0.932047	0	Il17rd
ENSMUSG00000036362	-8.86513	0.000131827	0.00126375	21.6884	0	106.091	0	26.0973	0	P2ry13
ENSMUSG00000068048	-8.86321	0.000132414	0.00126661	108.442	0	20.9971	0	25.1653	0	Rhox9
ENSMUSG00000093416	-8.86271	0.00199761	0.010371	130.13	0	24.3125	0	0	0	Gm18294
ENSMUSG00000027547	-8.86218	4.74448e-06	8.96903e-05	203.329	0.686007	86.1987	0	11.1846	0	Sall4
ENSMUSG00000060890	-8.86161	0.000464595	0.00333566	81.3315	0	71.8322	0	0.932047	0	Arr3
ENSMUSG00000106950	-8.86148	0.00211147	0.010797	135.552	0	18.7869	0	0	0	4930478M09Rik
ENSMUSG00000108081	-8.86129	0.0017394	0.00924236	92.1757	0	61.8862	0	0	0	Gm44026
ENSMUSG00000041359	-8.8594	0.00191587	0.0100146	121.997	0	32.0482	0	0	0	Tcl1
ENSMUSG00000074594	-8.85912	0.000506113	0.00356398	111.153	0	41.9942	0	0.932047	0	Wfdc9
ENSMUSG00000110709	-8.85804	0.00174545	0.0092611	84.0425	0	69.622	0	0	0	1700018P08Rik
ENSMUSG00000020698	-8.85775	0.000525695	0.00367365	116.575	0	36.4687	0	0.932047	0	Cct6b
ENSMUSG00000099424	-8.85763	0.000453027	0.00327182	130.13	0	22.1022	0	1.86409	0	Gm28641
ENSMUSG00000097845	-8.8575	0.000181003	0.00160962	119.286	0	19.892	0	14.9128	0	A230020J21Rik
ENSMUSG00000029123	-8.8561	0.00186532	0.00977829	113.864	0	39.784	0	0	0	Stk32b
ENSMUSG00000103751	-8.85465	3.58046e-08	1.78896e-06	428.346	1.37201	119.352	0	41.9421	0	Gm37283
ENSMUSG00000059898	-8.8546	0.000507959	0.00357561	108.442	0	44.2045	0	0.932047	0	Dsc3
ENSMUSG00000079644	-8.85366	3.74395e-08	1.85048e-06	409.368	0	69.622	0	76.4279	1.19597	Gm1110
ENSMUSG00000088734	-8.85282	0.00183545	0.00964926	105.731	0	47.5198	0	0	0	Gm23896
ENSMUSG00000107987	-8.85105	0.00220191	0.0111691	135.552	0	17.6818	0	0	0	Gm43905
ENSMUSG00000086631	-8.84969	0.000121779	0.0011878	84.0425	0	53.0454	0	15.8448	0	Gm12784
ENSMUSG00000097767	-8.84848	2.10918e-06	4.72747e-05	203.329	0.686007	62.9914	0	31.6896	0	Miat
ENSMUSG00000068536	-8.84693	0.00188722	0.00988319	108.442	0	44.2045	0	0	0	Doxl2
ENSMUSG00000022061	-8.84627	0.00181985	0.00958105	89.4646	0	62.9914	0	0	0	Nkx3-1
ENSMUSG00000075062	-8.84563	0.00193333	0.0100858	113.864	0	38.6789	0	0	0	Olfr1271
ENSMUSG00000101969	-8.84532	0.000153126	0.00141597	105.731	0	32.0482	0	14.9128	0	Gm20125
ENSMUSG00000099714	-8.8452	0.00233441	0.0116893	138.263	0	14.3664	0	0	0	Gm20587
ENSMUSG00000087606	-8.84422	0.000581338	0.00395841	143.686	0	4.42045	0	4.66024	0	Gm16121
ENSMUSG00000038805	-8.84394	0.000144864	0.00135668	97.5978	0	40.8891	0	13.9807	0	Six3
ENSMUSG00000108572	-8.84364	0.00186803	0.00978967	100.309	0	51.9402	0	0	0	Gm44883
ENSMUSG00000097899	-8.84341	0.00013595	0.00129167	97.5978	0	16.5767	0	38.2139	0	Gm16894
ENSMUSG00000026734	-8.84306	0.00206498	0.0106329	124.708	0	27.6278	0	0	0	4921504E06Rik
ENSMUSG00000107828	-8.84306	0.00206498	0.0106329	124.708	0	27.6278	0	0	0	Gm18289
ENSMUSG00000090698	-8.84243	0.000100955	0.00102959	75.9094	0	51.9402	0	24.2332	0	Apold1
ENSMUSG00000107656	-8.84182	0.000137851	0.00130432	100.309	0	34.2585	0	17.7089	0	4930563H07Rik
ENSMUSG00000085420	-8.84179	0.00216177	0.011002	130.13	0	22.1022	0	0	0	4930453O03Rik
ENSMUSG00000109808	-8.84179	0.00216177	0.011002	130.13	0	22.1022	0	0	0	5430402P08Rik
ENSMUSG00000036760	-8.84169	0.000312838	0.00246047	116.575	0	32.0482	0	3.72819	0	Kcnk9
ENSMUSG00000028626	-8.84121	0.000241863	0.00201592	92.1757	0	55.2556	0	4.66024	0	Col9a2
ENSMUSG00000103881	-8.84102	0.00194328	0.0101319	111.153	0	40.8891	0	0	0	Gm10748
ENSMUSG00000111703	-8.83986	0.000192182	0.00168776	268.394	0	27.6278	0.524192	0	0	Gm47161
ENSMUSG00000082924	-8.83972	0.0019966	0.0103686	116.575	0	35.3636	0	0	0	Gm11462
ENSMUSG00000024546	-8.83779	0.000513054	0.00360455	92.1757	0	58.5709	0	0.932047	0	4930546C10Rik
ENSMUSG00000111378	-8.83751	0.00015229	0.00141108	241.283	0	54.1505	0.524192	0	0	Gm47230
ENSMUSG00000087470	-8.83737	0.000211531	0.00181679	113.864	0	28.7329	0	9.32047	0	A630031M04Rik
ENSMUSG00000061802	-8.8362	0.000225208	0.00190746	111.153	0	33.1533	0	7.45638	0	Armc4
ENSMUSG00000079058	-8.83548	2.29173e-05	0.000312907	211.462	0.686007	81.7782	0	1.86409	0	Adam34
ENSMUSG00000082178	-8.83466	0.00244338	0.0121355	138.263	0	13.2613	0	0	0	Gm11307
ENSMUSG00000111354	-8.83428	0.000227795	0.00192315	119.286	0	22.1022	0	10.2525	0	Gm33914
ENSMUSG00000063063	-8.83254	1.58662e-05	0.000234817	184.351	0	107.196	0.524192	2.79614	0	Ctnna2
ENSMUSG00000102378	-8.83249	0.00214554	0.0109438	124.708	0	26.5227	0	0	0	Gm37972
ENSMUSG00000110579	-8.83249	0.00214554	0.0109438	124.708	0	26.5227	0	0	0	NA
ENSMUSG00000105995	-8.83242	0.00188968	0.00989182	81.3315	0	69.622	0	0	0	Gm43554
ENSMUSG00000068289	-8.83231	2.88711e-05	0.000380322	29.8215	1.37201	0	0	564.821	0	Cma2
ENSMUSG00000110004	-8.83208	0.000261785	0.00214414	48.7989	0	97.2498	0	4.66024	0	Gm45440
ENSMUSG00000100666	-8.83178	0.000528038	0.00368722	94.8867	0	55.2556	0	0.932047	0	1700007F19Rik
ENSMUSG00000056293	-8.83031	0.000260901	0.00214414	116.575	0	6.63067	0	27.9614	0	Gsdmc2
ENSMUSG00000103778	-8.82998	0.000435728	0.00317818	135.552	0	11.0511	0	4.66024	0	Gm36930
ENSMUSG00000058620	-8.82972	1.92929e-07	6.85608e-06	574.742	0	421.047	2.09677	0.932047	0	Adra2b
ENSMUSG00000032864	-8.82913	0.00207102	0.0106496	116.575	0	34.2585	0	0	0	Rag2
ENSMUSG00000087475	-8.82906	0.000260651	0.0021433	89.4646	0	4.42045	0	56.8549	0	4933406I18Rik
ENSMUSG00000102651	-8.82813	0.000360376	0.00273698	84.0425	0	2.21022	0	64.3112	0	Gm37080
ENSMUSG00000101964	-8.82783	0.00214343	0.0109413	121.997	0	28.7329	0	0	0	Gm28693
ENSMUSG00000023995	-8.82669	0.000233869	0.00196268	119.286	0	11.0511	0	20.505	0	Tspo2
ENSMUSG00000020226	-8.82659	0.000338566	0.00260634	100.309	0	47.5198	0	2.79614	0	Slc5a4b
ENSMUSG00000100457	-8.82654	0.00223782	0.0113137	127.419	0	23.2073	0	0	0	D830032E09Rik
ENSMUSG00000105672	-8.82612	0.000229809	0.00193569	116.575	0	9.946	0	24.2332	0	Gm42816
ENSMUSG00000017064	-8.82481	0.000196602	0.00171508	108.442	0	30.9431	0	11.1846	0	Prl5a1
ENSMUSG00000044250	-8.82449	6.54517e-06	0.00011635	195.196	0.686007	88.4089	0	9.32047	0	Pced1b
ENSMUSG00000109839	-8.82446	0.0020783	0.010675	113.864	0	36.4687	0	0	0	Gm45677
ENSMUSG00000110540	-8.82242	0.000248297	0.00206019	116.575	0	25.4176	0	8.38842	0	Gm45743
ENSMUSG00000034219	-8.82142	0.00018978	0.00166907	108.442	0	28.7329	0	13.0487	0	Sept14
ENSMUSG00000067578	-8.82135	0.000520512	0.00364622	127.419	0	20.9971	0	1.86409	0	Cbln4
ENSMUSG00000111299	-8.8211	0.00203942	0.0105402	105.731	0	44.2045	0	0	0	4930540M03Rik
ENSMUSG00000031661	-8.82085	4.93525e-06	9.28181e-05	195.196	0.686007	83.9885	0	13.0487	0	Nkd1
ENSMUSG00000053054	-8.82062	3.47154e-05	0.000441761	187.062	0	103.88	0	0.932047	0.597985	Adh6a
ENSMUSG00000090098	-8.81977	0.00208785	0.0107083	111.153	0	38.6789	0	0	0	Alms1-ps2
ENSMUSG00000085417	-8.81972	0.000238589	0.00199317	86.7536	0	57.4658	0	5.59228	0	Gm13919
ENSMUSG00000108670	-8.81957	9.59105e-05	0.000991382	62.3541	0	50.8351	0	36.3498	0	Gm44815
ENSMUSG00000045835	-8.81944	0.000119576	0.00117183	86.7536	0	27.6278	0	35.4178	0	Hdgfl1
ENSMUSG00000050014	-8.81932	0.00250951	0.0123701	135.552	0	14.3664	0	0	0	Apol10b
ENSMUSG00000020270	-8.819	0.000236696	0.00198006	116.575	0	23.2073	0	10.2525	0	Smim23
ENSMUSG00000032274	-8.81681	0.000190286	0.00167271	94.8867	0	9.946	0	44.7383	0	Cyp19a1
ENSMUSG00000091996	-8.81504	0.000566757	0.00388074	97.5978	0	50.8351	0	0.932047	0	BC049352
ENSMUSG00000102729	-8.81504	0.000171294	0.00154123	81.3315	0	11.0511	0	56.8549	0	Gm32444
ENSMUSG00000096618	-8.81465	0.000262989	0.00214926	119.286	0	20.9971	0	9.32047	0	Gm9286
ENSMUSG00000108345	-8.81458	0.00247214	0.0122352	132.841	0	16.5767	0	0	0	4933435G04Rik
ENSMUSG00000025429	-8.81373	0.000106549	0.00107292	73.1983	0	32.0482	0	43.8062	0	Pstpip2
ENSMUSG00000041592	-8.8136	5.3713e-09	3.77889e-07	989.533	3.43003	488.459	0	6.52433	0	Sdk2
ENSMUSG00000050654	-8.81335	0.00268785	0.0131222	138.263	0	11.0511	0	0	0	Olfr215
ENSMUSG00000110616	-8.81306	0.00204018	0.0105412	94.8867	0	54.1505	0	0	0	Gm36879
ENSMUSG00000106000	-8.813	0.000185184	0.00163886	108.442	0	23.2073	0	17.7089	0	Gm16508
ENSMUSG00000108357	-8.81258	2.00509e-06	4.57305e-05	173.507	0	86.1987	0.524192	30.7576	0	Snrp1c-ps1
ENSMUSG00000037224	-8.81251	7.28458e-06	0.000127184	230.439	0.686007	46.4147	0	13.9807	0	Zfyve28
ENSMUSG00000082945	-8.81173	0.000181967	0.00161507	105.731	0	27.6278	0	15.8448	0	Gm11540
ENSMUSG00000105516	-8.81113	0.00231889	0.0116274	124.708	0	24.3125	0	0	0	Gm36823
ENSMUSG00000050711	-8.81063	1.04924e-06	2.73294e-05	103.02	0.686007	135.929	0	50.3305	0	Scg2
ENSMUSG00000046607	-8.81038	0.000417075	0.00306824	105.731	0	2.21022	0	41.0101	0	Hrk
ENSMUSG00000061353	-8.80967	1.52451e-06	3.66863e-05	262.972	1.37201	313.852	0	1.86409	0	Cxcl12
ENSMUSG00000087501	-8.80933	0.000655613	0.00433032	119.286	0	28.7329	0	0.932047	0	Gm12116
ENSMUSG00000098154	-8.80916	1.51533e-08	9.17048e-07	395.813	0.686007	80.6731	0.524192	62.4472	0	Gm5787
ENSMUSG00000085600	-8.80906	0.00203782	0.0105379	67.7762	0	80.6731	0	0	0	E330012B07Rik
ENSMUSG00000031449	-8.80905	4.13257e-06	8.02742e-05	208.751	0.686007	60.7811	0	20.505	0	Atp4b
ENSMUSG00000065072	-8.80903	0.00216484	0.0110116	111.153	0	37.5738	0	0	0	Gm24533
ENSMUSG00000105675	-8.80771	0.00223007	0.0112839	116.575	0	32.0482	0	0	0	Gm43383
ENSMUSG00000025804	-8.80716	1.28744e-26	2.94581e-23	512.388	0.686007	1435.54	4.71772	1108.2	1.19597	Ccr1
ENSMUSG00000028730	-8.80579	4.71571e-06	8.92384e-05	225.017	0	30.9431	0.524192	33.5537	0	Cfap57
ENSMUSG00000019785	-8.80509	0.00242455	0.012055	127.419	0	20.9971	0	0	0	Clvs2
ENSMUSG00000095030	-8.80509	0.00242455	0.012055	127.419	0	20.9971	0	0	0	Olfr1513
ENSMUSG00000059352	-8.80431	0.00217635	0.0110578	108.442	0	39.784	0	0	0	Gm10064
ENSMUSG00000109868	-8.80358	0.000139229	0.00131195	78.6204	0	50.8351	0	18.6409	0	Gm39244
ENSMUSG00000107136	-8.80324	0.000118623	0.00116507	78.6204	0	38.6789	0	30.7576	0	Gm42466
ENSMUSG00000107483	-8.80294	0.000199122	0.00173105	108.442	0	16.5767	0	23.3012	0	Gm44288
ENSMUSG00000085235	-8.80189	4.02035e-11	6.30095e-09	539.499	0	444.255	1.57257	30.7576	0.597985	Gm12576
ENSMUSG00000005696	-8.8018	0.000132244	0.00126564	73.1983	0	54.1505	0	20.505	0	Sh2d1a
ENSMUSG00000096465	-8.80164	0.00231265	0.0116057	119.286	0	28.7329	0	0	0	Olfr488
ENSMUSG00000104158	-8.80053	0.000814279	0.0051541	132.841	0	14.3664	0	0.932047	0	Gm38100
ENSMUSG00000027902	-8.79941	0.00035829	0.00272612	121.997	0	5.52556	0	20.505	0	Chil6
ENSMUSG00000048982	-8.79935	0.000474422	0.00338633	108.442	0	37.5738	0	1.86409	0	Gphb5
ENSMUSG00000000730	-8.79894	0.00043019	0.00314655	70.4873	0	75.1476	0	1.86409	0	Dnmt3l
ENSMUSG00000096259	-8.79874	0.000273432	0.00221115	119.286	0	16.5767	0	12.1166	0	Gm3106
ENSMUSG00000090121	-8.79825	0.000323612	0.00252437	119.286	0	22.1022	0	6.52433	0	Abhd12b
ENSMUSG00000025482	-8.79821	0.0022452	0.0113448	111.153	0	36.4687	0	0	0	Odf3
ENSMUSG00000084628	-8.79761	2.68046e-05	0.000357788	206.04	0.686007	79.568	0	1.86409	0	Gm22613
ENSMUSG00000098001	-8.79695	0.0023646	0.0118178	29.8215	0	117.142	0	0	0	Gm27048
ENSMUSG00000041798	-8.79555	0.00240524	0.0119785	121.997	0	25.4176	0	0	0	Gck
ENSMUSG00000104586	-8.79479	0.000535671	0.00372491	132.841	0	11.0511	0	3.72819	0	4921539H07Rik
ENSMUSG00000102509	-8.79466	0.000160205	0.00146299	92.1757	0	18.7869	0	36.3498	0	Gm37368
ENSMUSG00000071629	-8.79463	0.000174287	0.00155939	100.309	0	20.9971	0	26.0973	0	Olfr1477
ENSMUSG00000030724	-8.79414	0.000175288	0.0015664	13.5552	0	56.3607	0	76.4279	0	Cd19
ENSMUSG00000083534	-8.79346	2.60832e-05	0.00035065	195.196	0	89.514	0.524192	1.86409	0	H2-M6-ps
ENSMUSG00000102971	-8.79344	0.000186386	0.00164711	241.283	0.686007	45.3096	0	0	0	A730062M13Rik
ENSMUSG00000063600	-8.79338	0.00061489	0.00411806	97.5978	0	48.6249	0	0.932047	0	Egfem1
ENSMUSG00000096958	-8.7931	0.000593412	0.00401182	78.6204	0	67.4118	0	0.932047	0	Gm26573
ENSMUSG00000026828	-8.79276	0.00215669	0.0109854	89.4646	0	57.4658	0	0	0	Galnt5
ENSMUSG00000090474	-8.79151	0.00020992	0.0018082	105.731	0	14.3664	0	27.0294	0	Gm9372
ENSMUSG00000085386	-8.79146	0.000270692	0.0021942	111.153	0	27.6278	0	8.38842	0	Gm13630
ENSMUSG00000111283	-8.79046	0.00065355	0.00431861	108.442	0	37.5738	0	0.932047	0	E230034D01Rik
ENSMUSG00000035032	-8.78957	0.000293715	0.00234575	119.286	0	16.5767	0	11.1846	0	Nek11
ENSMUSG00000082027	-8.78875	0.000217988	0.00185871	100.309	0	11.0511	0	35.4178	0	Gm11416
ENSMUSG00000075534	-8.78718	0.000635914	0.00422708	100.309	0	45.3096	0	0.932047	0	Gm13262
ENSMUSG00000039358	-8.78661	0.00220827	0.0111921	92.1757	0	54.1505	0	0	0	Drd5
ENSMUSG00000028712	-8.78657	0.000373965	0.00282081	100.309	0	3.31533	0	42.8742	0	Cyp4a31
ENSMUSG00000047324	-8.7862	0.000767996	0.0049103	124.708	0	20.9971	0	0.932047	0	4931429P17Rik
ENSMUSG00000111153	-8.78606	0.00212303	0.010847	92.1757	0	0	0	54.0587	0	Gm18820
ENSMUSG00000086225	-8.78596	0.00240405	0.0119758	116.575	0	29.838	0	0	0	Gm8661
ENSMUSG00000110024	-8.78468	0.000598557	0.00403111	97.5978	0	1.10511	0	47.5344	0	Gm7210
ENSMUSG00000032690	-8.78396	0.000152724	0.0014144	181.64	0	102.775	0	0	0.597985	Oas2
ENSMUSG00000087241	-8.78387	0.00228702	0.0114991	103.02	0	43.0993	0	0	0	Gm11844
ENSMUSG00000109432	-8.78351	0.000167501	0.00151453	94.8867	0	24.3125	0	27.0294	0	Gm44785
ENSMUSG00000050424	-8.78331	0.00263259	0.0128799	127.419	0	18.7869	0	0	0	Pnma5
ENSMUSG00000089697	-8.78251	0.00234195	0.0117238	108.442	0	37.5738	0	0	0	Gm15947
ENSMUSG00000064065	-8.7824	4.38264e-07	1.33941e-05	357.858	0	160.241	0	10.2525	1.19597	Ipcef1
ENSMUSG00000074365	-8.78115	0.00240885	0.0119932	113.864	0	32.0482	0	0	0	Crxos
ENSMUSG00000102721	-8.78093	0.000114357	0.00113044	56.932	0	41.9942	0	46.6024	0	A630081D01Rik
ENSMUSG00000104710	-8.78037	0.000548067	0.00378527	132.841	0	7.73578	0	5.59228	0	Gm31243
ENSMUSG00000049583	-8.78009	5.40419e-06	9.97951e-05	403.946	0	122.667	0	0.932047	1.19597	Grm5
ENSMUSG00000107966	-8.78003	0.000819789	0.00517469	127.419	0	17.6818	0	0.932047	0	Gm44001
ENSMUSG00000035932	-8.77997	1.86469e-05	0.000267969	254.839	0	16.5767	0.524192	13.0487	0	Olfr750
ENSMUSG00000034472	-8.77987	0.00074908	0.00481961	27.1105	0	117.142	0	0.932047	0	Rasd2
ENSMUSG00000093427	-8.7787	0.000912556	0.00561528	132.841	0	12.1562	0	0.932047	0	Gm18513
ENSMUSG00000078160	-8.77855	0.000448155	0.0032443	124.708	0	16.5767	0	4.66024	0	Gm16503
ENSMUSG00000024502	-8.77746	0.000520049	0.00364622	108.442	0	35.3636	0	1.86409	0	Jakmip2
ENSMUSG00000100484	-8.77717	0.00277792	0.013483	130.13	0	15.4716	0	0	0	Gm7133
ENSMUSG00000021056	-8.77619	0.00066298	0.00437304	100.309	0	44.2045	0	0.932047	0	Tex21
ENSMUSG00000111388	-8.77562	0.00228666	0.0114991	92.1757	0	53.0454	0	0	0	Gm7183
ENSMUSG00000033210	-8.77441	0.000198052	0.00172414	100.309	0	19.892	0	25.1653	0	Slc9c1
ENSMUSG00000038537	-8.77411	0.000329269	0.00255298	89.4646	0	4.42045	0	51.2626	0	Mc3r
ENSMUSG00000060057	-8.77391	0.000664567	0.00438194	48.7989	0	95.0396	0	0.932047	0	Olfr193
ENSMUSG00000085383	-8.77272	0.00218217	0.0110782	78.6204	0	0	0	66.1753	0	Gm14218
ENSMUSG00000022483	-8.77187	3.19488e-06	6.53115e-05	189.773	0.686007	62.9914	0	29.8255	0	Col2a1
ENSMUSG00000054976	-8.77177	0.000706838	0.0046011	130.13	0	13.2613	0	1.86409	0	Nyap2
ENSMUSG00000021381	-8.77148	0.00242921	0.0120749	108.442	0	36.4687	0	0	0	Barx1
ENSMUSG00000064010	-8.7681	0.000659503	0.00435324	89.4646	0	54.1505	0	0.932047	0	Dppa1
ENSMUSG00000036027	-8.7663	0.00015827	0.0014511	84.0425	0	34.2585	0	26.0973	0	1810046K07Rik
ENSMUSG00000086095	-8.76598	0.000486259	0.00345275	70.4873	0	71.8322	0	1.86409	0	Gm15328
ENSMUSG00000031636	-8.76494	0.000276868	0.00223061	81.3315	0	56.3607	0	6.52433	0	Pdlim3
ENSMUSG00000021356	-8.76419	0.000127512	0.00123192	54.221	0	36.4687	0	53.1267	0	Irf4
ENSMUSG00000111481	-8.76288	0.000494477	0.00349892	81.3315	0	60.7811	0	1.86409	0	Gm47652
ENSMUSG00000108085	-8.76254	0.00270865	0.0132027	121.997	0	22.1022	0	0	0	A930014E10Rik
ENSMUSG00000108096	-8.76176	0.00245763	0.0121865	103.02	0	40.8891	0	0	0	Minpp1-ps
ENSMUSG00000047799	-8.76174	0.000370168	0.00279562	119.286	0	16.5767	0	8.38842	0	Oog4
ENSMUSG00000030945	-8.76165	0.00017404	0.00155828	65.0652	0	61.8862	0	16.7768	0	Acsm2
ENSMUSG00000049929	-8.76138	0.000200891	0.00174255	46.0878	0	14.3664	0	82.9522	0	Lpar4
ENSMUSG00000109991	-8.76116	0.000445954	0.00323603	100.309	0	40.8891	0	2.79614	0	Gm6284
ENSMUSG00000107688	-8.76075	0.000161455	0.00147294	75.9094	0	46.4147	0	21.4371	0	Gm44091
ENSMUSG00000028476	-8.76014	5.47784e-06	0.000100872	195.196	0.686007	67.4118	0	17.7089	0	Reck
ENSMUSG00000102418	-8.7589	3.09186e-06	6.36312e-05	29.8215	0	74.0425	0	174.293	0.597985	Sh2d1b1
ENSMUSG00000027270	-8.75878	0.000717366	0.00465311	103.02	0	39.784	0	0.932047	0	Lamp5
ENSMUSG00000021228	-8.75822	0.000539424	0.00374173	124.708	0	15.4716	0	3.72819	0	Acot3
ENSMUSG00000078251	-8.75764	0.00270025	0.0131723	119.286	0	24.3125	0	0	0	Gm16487
ENSMUSG00000021609	-8.75615	1.37842e-05	0.000209587	241.283	0	19.892	0.524192	18.6409	0	Slc6a3
ENSMUSG00000080536	-8.75198	0.00249449	0.012316	97.5978	0	45.3096	0	0	0	Gm25539
ENSMUSG00000101634	-8.75198	0.00249449	0.012316	97.5978	0	45.3096	0	0	0	1700066B17Rik
ENSMUSG00000102316	-8.75074	0.000366544	0.00277559	111.153	0	25.4176	0	6.52433	0	Gm37629
ENSMUSG00000108708	-8.75067	0.00245244	0.0121693	59.6431	0	82.8834	0	0	0	Gm29977
ENSMUSG00000100301	-8.75	0.000158662	0.00145238	75.9094	0	27.6278	0	39.146	0	6030407O03Rik
ENSMUSG00000108122	-8.74948	0.000820647	0.00517832	116.575	0	25.4176	0	0.932047	0	Gm44116
ENSMUSG00000096537	-8.74887	0.000193401	0.00169441	75.9094	0	50.8351	0	15.8448	0	Fam240b
ENSMUSG00000060317	-8.74805	0.00087875	0.00546596	121.997	0	19.892	0	0.932047	0	Acnat2
ENSMUSG00000089146	-8.74756	0.00025314	0.00209469	103.02	0	15.4716	0	24.2332	0	Gm25266
ENSMUSG00000088713	-8.74566	0.00256514	0.0125969	100.309	0	41.9942	0	0	0	Gm22729
ENSMUSG00000096743	-8.74566	0.00256514	0.0125969	100.309	0	41.9942	0	0	0	Vmn2r32
ENSMUSG00000024176	-8.74517	0.000544839	0.0037715	124.708	0	13.2613	0	4.66024	0	Sox8
ENSMUSG00000095331	-8.74498	0.00248166	0.0122758	81.3315	0	60.7811	0	0	0	Ptma-ps1
ENSMUSG00000053368	-8.74455	0.000771481	0.00492571	127.419	0	13.2613	0	1.86409	0	Rxfp2
ENSMUSG00000108375	-8.74446	0.000460319	0.00331275	119.286	0	5.52556	0	17.7089	0	Gm45003
ENSMUSG00000104027	-8.74398	0.000598609	0.00403111	108.442	0	32.0482	0	1.86409	0	Gm37211
ENSMUSG00000081046	-8.74336	0.000261767	0.00214414	92.1757	0	39.784	0	10.2525	0	Gm12846
ENSMUSG00000081287	-8.74175	0.000326058	0.0025356	111.153	0	19.892	0	11.1846	0	Olfr333-ps1
ENSMUSG00000108820	-8.74072	0.00258572	0.0126844	97.5978	0	44.2045	0	0	0	Gm44620
ENSMUSG00000071000	-8.73968	0.000817291	0.00516603	111.153	0	29.838	0	0.932047	0	Olfr155
ENSMUSG00000098640	-8.73892	0.000301454	0.00239504	103.02	0	9.946	0	28.8935	0	Gm14214
ENSMUSG00000062593	-8.73741	1.1743e-42	2.15332e-38	1366.37	8.91809	2984.91	2.62096	2236.91	4.1859	Lilrb4a
ENSMUSG00000110685	-8.73625	1.74527e-05	0.000254109	235.861	0	29.838	0	10.2525	0.597985	Gm5373
ENSMUSG00000064522	-8.73624	0.000203846	0.00176401	89.4646	0	28.7329	0	23.3012	0	Gm26442
ENSMUSG00000032224	-8.73585	0.000213491	0.00182888	222.306	0.686007	53.0454	0	0	0	Fam81a
ENSMUSG00000085113	-8.7351	0.00254998	0.0125326	75.9094	0	65.2016	0	0	0	B130011K05Rik
ENSMUSG00000105065	-8.73467	2.62177e-07	8.89551e-06	474.434	0	229.863	1.57257	3.72819	0	Gm42513
ENSMUSG00000029679	-8.73441	0.000745633	0.00480586	89.4646	0	50.8351	0	0.932047	0	Hyal6
ENSMUSG00000104065	-8.73418	0.000599373	0.00403233	103.02	0	36.4687	0	1.86409	0	Gm37197
ENSMUSG00000046593	-8.73384	9.54469e-06	0.000157535	143.686	0.686007	122.667	0	8.38842	0	Tmem215
ENSMUSG00000109870	-8.73287	0.000762994	0.00488684	94.8867	0	45.3096	0	0.932047	0	Gm35850
ENSMUSG00000090005	-8.73259	0.000288244	0.00231112	105.731	0	18.7869	0	16.7768	0	Gm16540
ENSMUSG00000089241	-8.73223	0.00019617	0.00171375	75.9094	0	46.4147	0	18.6409	0	Gm24057
ENSMUSG00000108981	-8.72909	0.000349608	0.00267561	108.442	0	23.2073	0	9.32047	0	Gm15262
ENSMUSG00000096794	-8.72876	0.00306376	0.0145507	121.997	0	18.7869	0	0	0	Olfr905
ENSMUSG00000111507	-8.72747	0.000572184	0.00391497	86.7536	0	51.9402	0	1.86409	0	Amd-ps6
ENSMUSG00000103317	-8.72673	3.21087e-05	0.000415509	203.329	0	265.227	1.04838	0	0	Gm38359
ENSMUSG00000074653	-8.72669	8.53853e-07	2.31272e-05	387.68	0	111.616	0	9.32047	1.19597	Lrrc31
ENSMUSG00000029883	-8.72655	0.000305556	0.00241612	105.731	0	20.9971	0	13.9807	0	1700074P13Rik
ENSMUSG00000105048	-8.72653	0.00281909	0.0136467	108.442	0	32.0482	0	0	0	Gm42966
ENSMUSG00000050315	-8.72628	3.22768e-07	1.04201e-05	395.813	0	89.514	0	23.3012	1.19597	Synpo2
ENSMUSG00000026255	-8.72573	4.40238e-06	8.45303e-05	154.53	0.686007	98.3549	0	20.505	0	Efhd1
ENSMUSG00000074968	-8.72535	0.000488341	0.00346358	113.864	0	22.1022	0	4.66024	0	Ano3
ENSMUSG00000087839	-8.72516	0.00262654	0.0128571	70.4873	0	69.622	0	0	0	Gm23955
ENSMUSG00000032985	-8.72512	0.00291566	0.0140437	113.864	0	26.5227	0	0	0	5730522E02Rik
ENSMUSG00000086047	-8.72509	0.000405341	0.00299707	94.8867	0	40.8891	0	4.66024	0	9530046B11Rik
ENSMUSG00000092157	-8.72452	0.00268605	0.0131169	51.5099	0	88.4089	0	0	0	Gm17268
ENSMUSG00000104665	-8.72373	0.00304605	0.0144928	119.286	0	20.9971	0	0	0	Gm43366
ENSMUSG00000027355	-8.72324	0.000772715	0.00493016	121.997	0	16.5767	0	1.86409	0	Tmco5
ENSMUSG00000081660	-8.72271	0.000617221	0.00412613	116.575	0	20.9971	0	2.79614	0	Gm11787
ENSMUSG00000096225	-8.72195	0.000247365	0.00205432	75.9094	0	51.9402	0	12.1166	0	Lhx8
ENSMUSG00000011751	-8.72067	3.77982e-08	1.86319e-06	319.904	0.686007	175.713	0	25.1653	0.597985	Sptbn4
ENSMUSG00000111675	-8.72045	0.000461824	0.00332096	97.5978	0	38.6789	0	3.72819	0	Gm48861
ENSMUSG00000097178	-8.7201	0.00292102	0.0140522	111.153	0	28.7329	0	0	0	2310002F09Rik
ENSMUSG00000054659	-8.71732	0.00319596	0.015046	121.997	0	17.6818	0	0	0	Pm20d2
ENSMUSG00000084208	-8.71732	0.00319596	0.015046	121.997	0	17.6818	0	0	0	Gm12792
ENSMUSG00000059434	-8.71689	5.25439e-11	7.70798e-09	572.031	0	288.434	2.09677	80.156	0	Gckr
ENSMUSG00000041301	-8.71678	0.000259577	0.00213831	86.7536	0	39.784	0	13.0487	0	Cftr
ENSMUSG00000087338	-8.71608	0.000347565	0.0026622	100.309	0	30.9431	0	8.38842	0	Scpep1os
ENSMUSG00000086993	-8.71591	0.000209939	0.0018082	73.1983	0	47.5198	0	18.6409	0	Rsf1os2
ENSMUSG00000050926	-8.71507	0.00292793	0.0140585	108.442	0	30.9431	0	0	0	Dcaf12l2
ENSMUSG00000029878	-8.71427	0.000566574	0.00388074	105.731	0	30.9431	0	2.79614	0	Dbpht2
ENSMUSG00000075307	-8.71383	1.77481e-07	6.40643e-06	550.343	0	141.454	1.57257	7.45638	0	Klhl41
ENSMUSG00000045246	-8.71361	0.000426063	0.00311885	94.8867	0	39.784	0	4.66024	0	Kcng4
ENSMUSG00000105128	-8.71286	0.000625432	0.00417038	121.997	0	4.42045	0	13.0487	0	Gm42870
ENSMUSG00000057606	-8.71226	0.003174	0.0149772	119.286	0	19.892	0	0	0	Colq
ENSMUSG00000021536	-8.70993	0.000830384	0.00523004	94.8867	0	43.0993	0	0.932047	0	Adcy2
ENSMUSG00000106873	-8.70931	0.00278772	0.0135198	86.7536	0	51.9402	0	0	0	BC049739
ENSMUSG00000086377	-8.70903	1.49431e-05	0.000224784	219.595	0	11.0511	0.524192	40.078	0	4930529C04Rik
ENSMUSG00000073967	-8.70878	0.000366608	0.00277559	105.731	0	9.946	0	23.3012	0	Olfr557
ENSMUSG00000025930	-8.70859	0.00303606	0.0144603	111.153	0	27.6278	0	0	0	Msc
ENSMUSG00000104057	-8.7076	0.000260637	0.0021433	92.1757	0	17.6818	0	28.8935	0	Gm38130
ENSMUSG00000111129	-8.70741	0.000266813	0.00216868	94.8867	0	24.3125	0	19.573	0	Gm47542
ENSMUSG00000086190	-8.70734	0.00305317	0.0145229	29.8215	0	108.301	0	0	0	4930579M01Rik
ENSMUSG00000091260	-8.7064	0.00288341	0.0139323	97.5978	0	40.8891	0	0	0	Vmn2r19
ENSMUSG00000039720	-8.70594	0.000609596	0.00409007	62.3541	0	74.0425	0	1.86409	0	Got1l1
ENSMUSG00000096320	-8.70496	0.00295194	0.0141515	103.02	0	35.3636	0	0	0	Olfr1471
ENSMUSG00000103430	-8.70496	0.00295194	0.0141515	103.02	0	35.3636	0	0	0	Gm36996
ENSMUSG00000087384	-8.70317	0.00071315	0.0046274	113.864	0	2.21022	0	22.3691	0	Gm15558
ENSMUSG00000104286	-8.70302	0.000360463	0.00273698	92.1757	0	38.6789	0	7.45638	0	Gm37457
ENSMUSG00000107822	-8.70193	0.000771961	0.00492706	67.7762	0	1.10511	0	68.9715	0	Olfr1358
ENSMUSG00000049761	-8.70133	0.00290728	0.0140107	94.8867	0	43.0993	0	0	0	Pmis2
ENSMUSG00000097292	-8.70095	0.000623177	0.00415988	59.6431	0	76.2527	0	1.86409	0	A230107N01Rik
ENSMUSG00000060204	-8.69987	0.00297009	0.01422	100.309	0	37.5738	0	0	0	Gm5868
ENSMUSG00000038598	-8.69919	0.000577712	0.00394389	111.153	0	23.2073	0	3.72819	0	AI481877
ENSMUSG00000079566	-8.69771	0.00288898	0.0139556	86.7536	0	50.8351	0	0	0	Spin2d
ENSMUSG00000000365	-8.69768	0.000312909	0.00246047	78.6204	0	49.73	0	9.32047	0	Rnf17
ENSMUSG00000074461	-8.69666	0.000363606	0.00275628	62.3541	0	68.5169	0	6.52433	0	Gm10699
ENSMUSG00000071633	-8.69478	0.00299131	0.0142955	97.5978	0	39.784	0	0	0	Gm4952
ENSMUSG00000082389	-8.69315	0.000468505	0.00335323	103.02	0	5.52556	0	28.8935	0	Mkrn1-ps1
ENSMUSG00000031845	-8.69313	0.00047105	0.00336751	111.153	0	7.73578	0	18.6409	0	Bco1
ENSMUSG00000085747	-8.69196	0.00290307	0.0139941	65.0652	0	71.8322	0	0	0	Slc13a2os
ENSMUSG00000021700	-8.69187	0.00316119	0.0149322	108.442	0	28.7329	0	0	0	Rab3c
ENSMUSG00000051900	-8.69044	0.00328322	0.0153901	113.864	0	23.2073	0	0	0	Abca16
ENSMUSG00000020229	-8.69013	0.000932582	0.00569646	103.02	0	33.1533	0	0.932047	0	Slc5a4a
ENSMUSG00000111734	-8.68982	0.00086424	0.00539216	84.0425	0	51.9402	0	0.932047	0	Gm29825
ENSMUSG00000097762	-8.68959	0.000853278	0.00534194	65.0652	0	70.7271	0	0.932047	0	4732463B04Rik
ENSMUSG00000097548	-8.68958	0.000693706	0.0045317	97.5978	0	37.5738	0	1.86409	0	Gm26748
ENSMUSG00000016386	-8.68821	8.7901e-06	0.000148147	206.04	0	25.4176	0	35.4178	0.597985	Mpped2
ENSMUSG00000045591	-8.68714	0.000253701	0.00209638	84.0425	0	20.9971	0	31.6896	0	Olig3
ENSMUSG00000072601	-8.68579	0.00024414	0.00203296	18.9773	0	49.73	0	67.1074	0	Ear1
ENSMUSG00000028602	-8.68529	0.0032833	0.0153901	111.153	0	25.4176	0	0	0	Tnfrsf8
ENSMUSG00000068762	-8.68454	0.00304239	0.0144792	92.1757	0	44.2045	0	0	0	Gstm6
ENSMUSG00000109823	-8.68454	0.00304239	0.0144792	92.1757	0	44.2045	0	0	0	Gm45388
ENSMUSG00000025964	-8.68354	6.0192e-12	1.17419e-09	406.657	1.37201	158.031	0.524192	188.274	0	Adam23
ENSMUSG00000021575	-8.68296	0.000235767	0.001975	67.7762	0	19.892	0	48.4664	0	Ahrr
ENSMUSG00000054986	-8.6824	0.000603569	0.00405409	108.442	0	24.3125	0	3.72819	0	Sec14l3
ENSMUSG00000046323	-8.68237	0.00299401	0.0143009	78.6204	0	57.4658	0	0	0	Dppa3
ENSMUSG00000107352	-8.68237	0.00299401	0.0143009	78.6204	0	57.4658	0	0	0	Gm43660
ENSMUSG00000103345	-8.68131	0.000760696	0.00488064	105.731	0	28.7329	0	1.86409	0	Gm10723
ENSMUSG00000097191	-8.68128	0.000516449	0.00362562	113.864	0	13.2613	0	9.32047	0	5730422E09Rik
ENSMUSG00000079146	-8.68105	0.000682968	0.00447911	86.7536	0	47.5198	0	1.86409	0	Gm15353
ENSMUSG00000108798	-8.68088	0.00302648	0.0144222	84.0425	0	51.9402	0	0	0	Gm9521
ENSMUSG00000110286	-8.67783	0.000888136	0.00550374	65.0652	0	69.622	0	0.932047	0	Gm7706
ENSMUSG00000108419	-8.67735	0.00033278	0.00257259	81.3315	0	44.2045	0	10.2525	0	Gm45020
ENSMUSG00000021852	-8.67617	0.000217654	0.0018572	46.0878	0	27.6278	0	61.5151	0	Slc35f4
ENSMUSG00000034308	-8.67605	0.000263082	0.00214926	78.6204	0	18.7869	0	38.2139	0	Sdr42e1
ENSMUSG00000110387	-8.67445	4.54488e-06	8.67216e-05	159.952	0	75.1476	0	28.8935	0.597985	Gm45478
ENSMUSG00000086662	-8.67417	0.000398802	0.00296411	97.5978	0	28.7329	0	9.32047	0	BC046251
ENSMUSG00000087198	-8.67364	8.85986e-06	0.000148719	154.53	0	96.1447	0	13.0487	0.597985	Gm13097
ENSMUSG00000090017	-8.6735	0.00341627	0.0158874	111.153	0	24.3125	0	0	0	Gm16213
ENSMUSG00000021743	-8.67224	0.00336464	0.0156951	29.8215	0	104.986	0	0	0	Fezf2
ENSMUSG00000037016	-8.67141	1.71383e-07	6.22308e-06	325.326	0	86.1987	1.04838	50.3305	0	Frem2
ENSMUSG00000027517	-8.66977	0.00330583	0.0154759	103.02	0	32.0482	0	0	0	Ankrd60
ENSMUSG00000086821	-8.66923	0.000352555	0.00268695	97.5978	0	19.892	0	17.7089	0	Gm13377
ENSMUSG00000082161	-8.66838	0.00030097	0.00239223	89.4646	0	23.2073	0	22.3691	0	Gm11350
ENSMUSG00000031965	-8.66764	0.000314656	0.00247208	89.4646	0	28.7329	0	16.7768	0	Tbx20
ENSMUSG00000089700	-8.66688	0.000489646	0.00347068	94.8867	0	5.52556	0	34.4857	0	Gm2343
ENSMUSG00000062200	-8.66605	0.00324606	0.0152311	94.8867	0	39.784	0	0	0	Vmn2r7
ENSMUSG00000026523	-8.66493	0.00107237	0.006372	108.442	0	25.4176	0	0.932047	0	Wdr64
ENSMUSG00000063089	-8.66432	0.000797403	0.00506652	103.02	0	29.838	0	1.86409	0	Klk1b8
ENSMUSG00000030247	-8.66405	0.00331934	0.0155272	37.9547	0	96.1447	0	0	0	Kcnj8
ENSMUSG00000060583	-8.66339	0.00114395	0.00670795	113.864	0	19.892	0	0.932047	0	Olfr881
ENSMUSG00000043939	-8.66318	1.65664e-05	0.000244194	149.108	0	106.091	0	6.52433	0.597985	A530064D06Rik
ENSMUSG00000097250	-8.66309	0.00105549	0.00628393	111.153	0	1.10511	0	22.3691	0	Gm26771
ENSMUSG00000068180	-8.66273	0.000844195	0.00529775	108.442	0	24.3125	0	1.86409	0	AY512915
ENSMUSG00000030972	-8.6618	1.55668e-05	0.000232261	216.884	0.686007	20.9971	0	24.2332	0	Acsm5
ENSMUSG00000081811	-8.66161	0.00355604	0.0163919	111.153	0	23.2073	0	0	0	Gm12713
ENSMUSG00000109370	-8.66161	0.00355604	0.0163919	111.153	0	23.2073	0	0	0	Gm44675
ENSMUSG00000095661	-8.66132	0.000930554	0.00569007	92.1757	0	1.10511	0	41.0101	0	Gm8935
ENSMUSG00000100120	-8.66084	0.00327379	0.0153533	92.1757	0	41.9942	0	0	0	Gm553
ENSMUSG00000040706	-8.66038	0.000350027	0.00267658	94.8867	0	19.892	0	19.573	0	Agmat
ENSMUSG00000047182	-8.65934	0.00334429	0.01562	97.5978	0	36.4687	0	0	0	Irs3
ENSMUSG00000030483	-8.6585	0.000277001	0.00223061	73.1983	0	18.7869	0	41.9421	0	Cyp2b10
ENSMUSG00000070796	-8.65777	0.000994539	0.00600094	92.1757	0	40.8891	0	0.932047	0	Psg21
ENSMUSG00000021559	-8.65612	2.1963e-11	3.76388e-09	355.147	0.686007	290.644	0	93.2047	1.19597	Dapk1
ENSMUSG00000091842	-8.65498	0.000340364	0.00261797	78.6204	0	12.1562	0	42.8742	0	Gm16490
ENSMUSG00000038204	-8.65417	0.000260059	0.00214131	73.1983	0	34.2585	0	26.0973	0	Asb10
ENSMUSG00000109083	-8.65397	0.000798938	0.005071	97.5978	0	34.2585	0	1.86409	0	Gm44992
ENSMUSG00000075149	-8.65196	0.000419145	0.00307804	92.1757	0	32.0482	0	9.32047	0	Olfr1138
ENSMUSG00000041984	-8.65177	0.000633547	0.00421377	78.6204	0	51.9402	0	2.79614	0	Rptn
ENSMUSG00000097288	-8.6511	0.00355852	0.0163993	105.731	0	27.6278	0	0	0	Gm2155
ENSMUSG00000045404	-8.64981	0.000561431	0.00385574	59.6431	0	69.622	0	3.72819	0	Kcnk13
ENSMUSG00000075172	-8.64962	0.00370312	0.0169295	111.153	0	22.1022	0	0	0	Olfr1090
ENSMUSG00000085981	-8.64962	0.00370312	0.0169295	111.153	0	22.1022	0	0	0	NA
ENSMUSG00000044444	-8.64884	0.00339704	0.0158206	92.1757	0	40.8891	0	0	0	Pfn3
ENSMUSG00000108285	-8.64792	0.000579218	0.00395131	97.5978	0	30.9431	0	4.66024	0	Gm34358
ENSMUSG00000044597	-8.64734	0.000561318	0.00385574	89.4646	0	4.42045	0	39.146	0	Mycs
ENSMUSG00000074625	-8.64422	1.68456e-05	0.000247244	393.102	0.686007	88.4089	0.524192	0	0	Arhgap40
ENSMUSG00000024532	-8.64352	0.000364597	0.00276265	81.3315	0	12.1562	0	39.146	0	1700034E13Rik
ENSMUSG00000028938	-8.64298	0.00033378	0.00257924	86.7536	0	25.4176	0	20.505	0	Galntl5
ENSMUSG00000094588	-8.64248	0.00111908	0.00659613	103.02	0	28.7329	0	0.932047	0	Olfr898
ENSMUSG00000027855	-8.64089	0.00118051	0.00686769	108.442	0	23.2073	0	0.932047	0	Sycp1
ENSMUSG00000033826	-8.64035	1.18627e-10	1.52116e-08	799.759	1.37201	148.085	0.524192	29.8255	0.597985	Dnah8
ENSMUSG00000000216	-8.63943	0.000299368	0.00238364	70.4873	0	18.7869	0	42.8742	0	Scnn1g
ENSMUSG00000086617	-8.63902	0.00370119	0.0169295	105.731	0	26.5227	0	0	0	Gm11635
ENSMUSG00000108027	-8.63887	0.000342497	0.00263218	81.3315	0	15.4716	0	35.4178	0	Gm44271
ENSMUSG00000099464	-8.63827	0.0034606	0.0160407	86.7536	0	45.3096	0	0	0	Gm5260
ENSMUSG00000020524	-8.63767	2.15748e-05	0.000300393	200.618	0.686007	48.6249	0	8.38842	0	Gria1
ENSMUSG00000109713	-8.63695	0.00347382	0.0160857	48.7989	0	82.8834	0	0	0	Pvrig
ENSMUSG00000018168	-8.63521	0.00360665	0.0165836	97.5978	0	34.2585	0	0	0	Ikzf3
ENSMUSG00000107100	-8.63496	0.000590884	0.00400326	108.442	0	14.3664	0	9.32047	0	Gm18482
ENSMUSG00000110719	-8.63386	0.000466394	0.00334579	100.309	0	17.6818	0	13.9807	0	Gm2716
ENSMUSG00000107059	-8.63384	0.000377517	0.00283897	84.0425	0	13.2613	0	34.4857	0	Gm43629
ENSMUSG00000098854	-8.63063	0.000257243	0.00212194	151.819	0.686007	103.88	0	0	0	Gm5118
ENSMUSG00000032181	-8.6305	0.00055458	0.00381966	75.9094	0	50.8351	0	4.66024	0	Scg3
ENSMUSG00000106973	-8.62989	0.00363139	0.0166681	94.8867	0	36.4687	0	0	0	Gm43415
ENSMUSG00000109844	-8.62989	0.00363139	0.0166681	94.8867	0	36.4687	0	0	0	Gm31816
ENSMUSG00000024766	-8.62977	0.00104468	0.00623778	65.0652	0	65.2016	0	0.932047	0	Lipo3
ENSMUSG00000037548	-8.6288	6.66715e-22	8.73254e-19	395.813	0	1010.07	3.14515	625.404	1.79396	H2-DMb2
ENSMUSG00000085104	-8.62847	0.000290039	0.00232145	62.3541	0	22.1022	0	46.6024	0	Gm11731
ENSMUSG00000036744	-8.62836	0.00372663	0.0170073	100.309	0	30.9431	0	0	0	Olfr701
ENSMUSG00000069830	-8.62825	5.42363e-05	0.000623672	189.773	0	64.0965	0	1.86409	0.597985	Nlrp1a
ENSMUSG00000027849	-8.62808	0.000925345	0.00567303	103.02	0	26.5227	0	1.86409	0	Syt6
ENSMUSG00000101968	-8.62684	0.00385089	0.0174441	105.731	0	25.4176	0	0	0	1700027A15Rik
ENSMUSG00000108497	-8.62545	0.000328509	0.00254925	78.6204	0	30.9431	0	21.4371	0	Gm44738
ENSMUSG00000022218	-8.62316	0.000261551	0.00214414	138.263	0	116.037	0	0	0.597985	Tgm1
ENSMUSG00000054999	-8.62229	0.00358247	0.0164765	78.6204	0	51.9402	0	0	0	Naaladl1
ENSMUSG00000105063	-8.62125	0.000740827	0.00478497	97.5978	0	3.31533	0	29.8255	0	Gm43488
ENSMUSG00000029660	-8.61763	0.00377148	0.017182	94.8867	0	35.3636	0	0	0	Tex26
ENSMUSG00000036800	-8.61692	0.00362913	0.0166681	75.9094	0	54.1505	0	0	0	Fam135b
ENSMUSG00000054690	-8.61582	4.29687e-06	8.2813e-05	344.303	0	123.772	0	2.79614	1.19597	Emcn
ENSMUSG00000086637	-8.61456	0.00400811	0.0180448	105.731	0	24.3125	0	0	0	Gm14040
ENSMUSG00000100880	-8.61456	0.00400811	0.0180448	105.731	0	24.3125	0	0	0	Gm6610
ENSMUSG00000031510	-8.61291	0.000804052	0.00509464	27.1105	0	3.31533	0	98.797	0	1700128E19Rik
ENSMUSG00000109054	-8.60996	0.00371533	0.0169684	78.6204	0	50.8351	0	0	0	Gm44789
ENSMUSG00000106248	-8.60914	0.00401486	0.0180589	103.02	0	26.5227	0	0	0	Gm9728
ENSMUSG00000085106	-8.60839	0.00376517	0.0171618	84.0425	0	45.3096	0	0	0	Gm16000
ENSMUSG00000020123	-8.60637	0.00409078	0.0183339	27.1105	0	101.67	0	0	0	Avpr1a
ENSMUSG00000039943	-8.60637	5.22416e-07	1.53028e-05	341.592	0	104.986	0	21.4371	1.19597	Plcb4
ENSMUSG00000086321	-8.60555	0.000332678	0.00257259	70.4873	0	23.2073	0	35.4178	0	Gm11413
ENSMUSG00000100166	-8.60371	0.00402803	0.0181078	100.309	0	28.7329	0	0	0	B230110G15Rik
ENSMUSG00000059854	-8.60352	1.90961e-10	2.31897e-08	1412.46	0	520.508	3.66934	7.45638	1.19597	Hydin
ENSMUSG00000098153	-8.60297	0.00380784	0.0172832	81.3315	0	47.5198	0	0	0	Gm27024
ENSMUSG00000105816	-8.60138	5.52726e-05	0.000629915	230.439	0.686007	8.84089	0	12.1166	0	D030025E07Rik
ENSMUSG00000101395	-8.59994	0.0037781	0.0172022	89.4646	0	0	0	39.146	0	Gm8241
ENSMUSG00000009900	-8.59912	0.00381449	0.0173049	73.1983	0	55.2556	0	0	0	Wnt3a
ENSMUSG00000024366	-8.59891	0.000457421	0.00329836	10.8442	0	68.5169	0	48.4664	0	Gfra3
ENSMUSG00000110215	-8.59883	0.000719612	0.00466602	97.5978	0	26.5227	0	4.66024	0	Gm45598
ENSMUSG00000025104	-8.59731	1.55934e-07	5.81715e-06	349.725	0	65.2016	0.524192	37.2819	0.597985	Hdgfl3
ENSMUSG00000030666	-8.597	0.000409507	0.00302179	84.0425	0	22.1022	0	22.3691	0	Calcb
ENSMUSG00000098143	-8.59692	0.000359324	0.00273172	37.9547	0	20.9971	0	68.9715	0	Gm26937
ENSMUSG00000102227	-8.59592	0.000900646	0.00556628	67.7762	0	58.5709	0	1.86409	0	Gm37302
ENSMUSG00000005232	-8.59279	0.00406829	0.0182531	94.8867	0	33.1533	0	0	0	G6pc2
ENSMUSG00000093649	-8.59279	0.00406829	0.0182531	94.8867	0	33.1533	0	0	0	Gm20614
ENSMUSG00000099892	-8.59248	0.00121955	0.007039	46.0878	0	80.6731	0	0.932047	0	Gm18185
ENSMUSG00000030069	-8.59204	0.000398574	0.00296377	70.4873	0	15.4716	0	41.9421	0	Prok2
ENSMUSG00000049100	-8.59138	4.60246e-05	0.000548032	173.507	0	72.9374	0.524192	2.79614	0	Pcdh10
ENSMUSG00000026114	-8.59064	0.000949862	0.00578082	84.0425	0	41.9942	0	1.86409	0	Cnga3
ENSMUSG00000001827	-8.59062	0.000707536	0.00460246	105.731	0	12.1562	0	10.2525	0	Folr1
ENSMUSG00000026398	-8.59009	0.000770211	0.00491932	92.1757	0	32.0482	0	3.72819	0	Nr5a2
ENSMUSG00000031374	-8.58889	0.00401466	0.0180589	86.7536	0	40.8891	0	0	0	Zfp92
ENSMUSG00000108239	-8.58623	0.000446655	0.00323782	70.4873	0	12.1562	0	44.7383	0	Gm19434
ENSMUSG00000045608	-8.58513	2.90974e-05	0.000382753	184.351	0.686007	57.4658	0	6.52433	0	Dbx2
ENSMUSG00000075553	-8.58433	0.00397662	0.0179251	59.6431	0	67.4118	0	0	0	Gm5464
ENSMUSG00000081586	-8.58323	0.000590981	0.00400326	78.6204	0	6.63067	0	41.9421	0	Gm11544
ENSMUSG00000033825	-8.58232	8.8315e-11	1.22684e-08	16.2663	2.05802	93.9345	1.04838	1522.03	1.19597	Tpsb2
ENSMUSG00000104485	-8.5811	0.00401187	0.0180574	70.4873	0	56.3607	0	0	0	Gm38065
ENSMUSG00000105909	-8.5805	9.31185e-05	0.00097073	233.15	0.686007	9.946	0	4.66024	0	Gm43189
ENSMUSG00000027204	-8.58015	1.00606e-13	2.79517e-11	482.567	0.686007	1973.73	0.524192	66.1753	5.38187	Fbn1
ENSMUSG00000097018	-8.57818	0.000659917	0.00435441	97.5978	0	20.9971	0	8.38842	0	Gm26872
ENSMUSG00000036449	-8.57742	0.000325046	0.00253094	48.7989	0	43.0993	0	34.4857	0	Lcn8
ENSMUSG00000026358	-8.57698	1.69234e-21	1.93952e-18	376.836	0.686007	3258.97	3.14515	1962.89	10.7637	Rgs1
ENSMUSG00000039578	-8.57614	2.17035e-06	4.83111e-05	276.527	0	175.713	0	5.59228	1.19597	Ccser1
ENSMUSG00000106498	-8.57546	0.000397507	0.00295789	73.1983	0	30.9431	0	22.3691	0	Gm43032
ENSMUSG00000097434	-8.57365	0.000804879	0.00509812	97.5978	0	24.3125	0	4.66024	0	Gm16630
ENSMUSG00000030092	-8.5734	0.000583932	0.00397165	94.8867	0	17.6818	0	13.9807	0	Cntn6
ENSMUSG00000106333	-8.57236	0.000937963	0.00572358	94.8867	0	28.7329	0	2.79614	0	4930428O21Rik
ENSMUSG00000071540	-8.57235	0.00414879	0.0185437	78.6204	0	47.5198	0	0	0	3425401B19Rik
ENSMUSG00000026989	-8.57204	1.58961e-05	0.00023507	187.062	0.686007	38.6789	0	20.505	0	Dapl1
ENSMUSG00000027932	-8.57136	3.41784e-05	0.00043766	162.663	0	78.4629	0.524192	4.66024	0	Slc27a3
ENSMUSG00000099735	-8.56828	0.000106375	0.00107176	192.484	0	51.9402	0	0.932047	0.597985	1700122H20Rik
ENSMUSG00000040432	-8.56613	0.00419406	0.0186848	56.932	0	68.5169	0	0	0	Ltb4r2
ENSMUSG00000086641	-8.56542	0.00131139	0.00746336	51.5099	0	72.9374	0	0.932047	0	Gm13663
ENSMUSG00000050810	-8.56355	0.00432949	0.0191809	86.7536	0	38.6789	0	0	0	Oog3
ENSMUSG00000030450	-8.56225	4.3824e-05	0.00053008	206.04	0	32.0482	0.524192	6.52433	0	Oca2
ENSMUSG00000104068	-8.56186	0.00131003	0.00746335	62.3541	0	61.8862	0	0.932047	0	Gm37199
ENSMUSG00000040013	-8.55683	0.00148353	0.00817906	97.5978	0	26.5227	0	0.932047	0	Fkbp6
ENSMUSG00000109505	-8.55634	0.00133562	0.00756605	59.6431	0	64.0965	0	0.932047	0	Gm44677
ENSMUSG00000087886	-8.55633	0.00445877	0.0196729	89.4646	0	35.3636	0	0	0	Gm23599
ENSMUSG00000044912	-8.55565	0.000399267	0.00296411	56.932	0	45.3096	0	22.3691	0	Syt16
ENSMUSG00000022487	-8.55563	0.00431605	0.0191306	70.4873	0	54.1505	0	0	0	Gtsf1
ENSMUSG00000086582	-8.55512	0.000493241	0.00349211	73.1983	0	37.5738	0	13.9807	0	Gm16272
ENSMUSG00000098630	-8.55472	0.00457156	0.020098	94.8867	0	29.838	0	0	0	Gm27198
ENSMUSG00000100837	-8.55114	0.000668446	0.00440512	75.9094	0	41.9942	0	6.52433	0	1700063D05Rik
ENSMUSG00000020310	-8.55108	0.000550338	0.0037981	84.0425	0	14.3664	0	26.0973	0	Madcam1
ENSMUSG00000000562	-8.55004	0.000670284	0.00441096	92.1757	0	9.946	0	22.3691	0	Adora3
ENSMUSG00000083168	-8.54943	0.000461377	0.00331905	59.6431	0	48.6249	0	15.8448	0	Gm14201
ENSMUSG00000097578	-8.54908	0.00459999	0.0201932	92.1757	0	32.0482	0	0	0	Gm26798
ENSMUSG00000083191	-8.54733	0.000549243	0.00379197	84.0425	0	24.3125	0	15.8448	0	Gm15571
ENSMUSG00000105893	-8.54721	0.000339768	0.00261449	127.419	0	113.826	0.524192	0	0	Wdr46-ps
ENSMUSG00000028996	-8.54579	0.000680351	0.00446354	94.8867	0	14.3664	0	14.9128	0	Rbp7
ENSMUSG00000067049	-8.54398	0.0004323	0.00315694	65.0652	0	23.2073	0	35.4178	0	Unc93a
ENSMUSG00000021217	-8.5437	1.08066e-05	0.000172613	165.374	0	38.6789	0	37.2819	0.597985	Tshz3
ENSMUSG00000022986	-8.54332	0.00118581	0.00689196	92.1757	0	29.838	0	1.86409	0	Krt75
ENSMUSG00000108810	-8.54253	0.000642872	0.0042588	81.3315	0	8.84089	0	33.5537	0	Gm44629
ENSMUSG00000029843	-8.54201	6.02177e-11	8.69458e-09	761.805	3.43003	377.948	0	76.4279	0	Slc13a4
ENSMUSG00000030976	-8.5418	0.00475542	0.020757	94.8867	0	28.7329	0	0	0	Tex36
ENSMUSG00000020793	-8.54134	0.00111617	0.00658112	78.6204	0	43.0993	0	1.86409	0	Galr2
ENSMUSG00000090665	-8.54106	0.00452462	0.0199096	75.9094	0	47.5198	0	0	0	Gad1-ps
ENSMUSG00000097895	-8.54048	7.76735e-08	3.40742e-06	260.261	0	89.514	0	96.9329	1.19597	Gm18709
ENSMUSG00000103424	-8.53941	0.00458862	0.0201633	81.3315	0	41.9942	0	0	0	Gm37535
ENSMUSG00000089934	-8.53869	0.000534911	0.00372104	70.4873	0	39.784	0	13.0487	0	4930473D10Rik
ENSMUSG00000109657	-8.53787	1.13134e-05	0.00017884	135.552	0.686007	83.9885	0	20.505	0	1700008N11Rik
ENSMUSG00000039375	-8.53309	3.50006e-07	1.11039e-05	341.592	0.686007	102.775	0	14.9128	0.597985	Wdr17
ENSMUSG00000074366	-8.53304	0.00459306	0.0201683	59.6431	0	62.9914	0	0	0	Obox5
ENSMUSG00000097959	-8.52855	0.000928532	0.00568422	67.7762	0	3.31533	0	51.2626	0	Gm6931
ENSMUSG00000106837	-8.52802	0.00469709	0.0205544	75.9094	0	46.4147	0	0	0	D630030B08Rik
ENSMUSG00000049926	-8.52755	0.000756502	0.00485883	81.3315	0	6.63067	0	34.4857	0	Olfr921
ENSMUSG00000027867	-8.52728	9.00483e-09	5.81414e-07	666.918	0	106.091	2.09677	44.7383	0	Spag17
ENSMUSG00000088346	-8.52699	0.00156779	0.00852972	89.4646	0	32.0482	0	0.932047	0	Gm22337
ENSMUSG00000055761	-8.52636	0.00114765	0.00672131	65.0652	0	55.2556	0	1.86409	0	Nkain3
ENSMUSG00000108553	-8.52566	0.00468576	0.020536	62.3541	0	59.676	0	0	0	Gm38569
ENSMUSG00000092815	-8.52468	0.00485666	0.0211185	86.7536	0	35.3636	0	0	0	Mir3099
ENSMUSG00000027581	-8.52393	0.000888419	0.00550374	35.2436	0	81.7782	0	4.66024	0	Stmn3
ENSMUSG00000097205	-8.52303	0.0049753	0.0215577	92.1757	0	29.838	0	0	0	Gm17540
ENSMUSG00000062181	-8.52157	0.00078934	0.00502051	73.1983	0	43.0993	0	5.59228	0	Ces3b
ENSMUSG00000105593	-8.52062	0.00481923	0.0209906	78.6204	0	43.0993	0	0	0	Gm42952
ENSMUSG00000108240	-8.52062	0.00481923	0.0209906	78.6204	0	43.0993	0	0	0	Gm5317
ENSMUSG00000023192	-8.51895	0.00125575	0.00721838	86.7536	0	33.1533	0	1.86409	0	Grm2
ENSMUSG00000007097	-8.51815	8.05312e-05	0.000860025	197.907	0.686007	36.4687	0	2.79614	0	Atp1a2
ENSMUSG00000040601	-8.51486	0.00487706	0.0211921	75.9094	0	45.3096	0	0	0	Nlrp4a
ENSMUSG00000010021	-8.51444	0.00581661	0.0245306	13.5552	0	107.196	0	0	0	Kif19a
ENSMUSG00000028804	-8.51319	1.4527e-08	8.84991e-07	531.366	2.05802	130.403	0	46.6024	0	Csmd2
ENSMUSG00000031216	-8.51274	5.09427e-08	2.39473e-06	206.04	0	98.3549	0	133.283	1.19597	Stard8
ENSMUSG00000079356	-8.51264	0.000601962	0.00404773	65.0652	0	12.1562	0	43.8062	0	Mettl4-ps1
ENSMUSG00000040724	-8.5122	8.22796e-05	0.000876167	214.173	0.686007	16.5767	0	5.59228	0	Kcna2
ENSMUSG00000088365	-8.51149	0.00504862	0.0218289	86.7536	0	34.2585	0	0	0	Gm26321
ENSMUSG00000020932	-8.51086	2.19279e-05	0.000303695	43.3768	0	173.503	0	17.7089	0.597985	Gfap
ENSMUSG00000058717	-8.5106	0.000832068	0.00523598	94.8867	0	13.2613	0	13.0487	0	Gm4763
ENSMUSG00000060212	-8.51054	3.01242e-10	3.47413e-08	938.023	0.686007	280.698	2.62096	20.505	0	Pcnx2
ENSMUSG00000104751	-8.5097	0.000852341	0.00533973	16.2663	0	92.8294	0	11.1846	0	Gm43179
ENSMUSG00000047207	-8.50908	0.00493936	0.0214323	73.1983	0	47.5198	0	0	0	Olfr1495
ENSMUSG00000050772	-8.50837	0.0006365	0.00422708	73.1983	0	12.1562	0	35.4178	0	Olfr1124
ENSMUSG00000056133	-8.50478	0.000699845	0.00456367	84.0425	0	13.2613	0	23.3012	0	Gm9992
ENSMUSG00000097728	-8.50386	2.1566e-05	0.000300393	159.952	0	60.7811	0	13.9807	0.597985	Gm26840
ENSMUSG00000099528	-8.50304	0.000433337	0.003162	173.507	0	60.7811	0	0	0.597985	2410012E07Rik
ENSMUSG00000052616	-8.50242	1.12019e-05	0.000177935	149.108	0	50.8351	0.524192	34.4857	0	Terb1
ENSMUSG00000105106	-8.50232	0.00166365	0.00895142	84.0425	0	35.3636	0	0.932047	0	Gm43657
ENSMUSG00000043301	-8.49988	0.000101561	0.0010352	206.04	0	25.4176	0.524192	2.79614	0	Kcnj6
ENSMUSG00000102561	-8.49988	0.00514452	0.0221913	81.3315	0	38.6789	0	0	0	Gm37039
ENSMUSG00000096597	-8.49918	0.0050436	0.0218124	62.3541	0	57.4658	0	0	0	Gm21886
ENSMUSG00000050370	-8.49852	0.000598247	0.00403111	27.1105	0	71.8322	0	20.505	0	Ch25h
ENSMUSG00000045514	-8.4984	0.000722067	0.00467533	40.6657	0	69.622	0	9.32047	0	Olfr460
ENSMUSG00000038602	-8.49777	0.00086063	0.00538063	92.1757	0	17.6818	0	10.2525	0	Slc35f1
ENSMUSG00000110836	-8.49501	7.77054e-05	0.000834242	119.286	0	111.616	0.524192	1.86409	0	Gm48801
ENSMUSG00000082661	-8.49471	0.00173052	0.00920582	86.7536	0	32.0482	0	0.932047	0	Gm11590
ENSMUSG00000106107	-8.49343	4.23013e-05	0.000514718	187.062	0	8.84089	0.524192	37.2819	0	Gm43190
ENSMUSG00000104215	-8.49162	0.00515336	0.0222232	65.0652	0	54.1505	0	0	0	Rpl13-ps4
ENSMUSG00000023873	-8.49012	0.000761923	0.00488495	78.6204	0	9.946	0	30.7576	0	1700010I14Rik
ENSMUSG00000055313	-8.48945	0.0009666	0.00586411	75.9094	0	38.6789	0	4.66024	0	Pgbd1
ENSMUSG00000074655	-8.48639	0.000616233	0.00412395	62.3541	0	15.4716	0	41.0101	0	Gm1527
ENSMUSG00000046178	-8.48624	0.000140428	0.00132053	178.929	0.686007	51.9402	0	0.932047	0	Nxph1
ENSMUSG00000097295	-8.48335	0.00531294	0.0228211	48.7989	0	69.622	0	0	0	Hmgb1-ps8
ENSMUSG00000027606	-8.48317	0.000912472	0.00561528	81.3315	0	30.9431	0	6.52433	0	Dnajc5b
ENSMUSG00000031285	-8.48075	3.03906e-05	0.000397767	159.952	0	60.7811	0	10.2525	0.597985	Dcx
ENSMUSG00000108689	-8.48056	0.00540366	0.0231134	78.6204	0	39.784	0	0	0	Gm45354
ENSMUSG00000085610	-8.47884	0.00550578	0.0234704	84.0425	0	34.2585	0	0	0	Gm14747
ENSMUSG00000104474	-8.47884	0.00550578	0.0234704	84.0425	0	34.2585	0	0	0	Gm38210
ENSMUSG00000022829	-8.47833	0.00100587	0.00605344	89.4646	0	6.63067	0	22.3691	0	Stxbp5l
ENSMUSG00000054087	-8.47724	0.0017739	0.00939031	78.6204	0	38.6789	0	0.932047	0	Fbxw28
ENSMUSG00000031443	-8.47544	2.17725e-09	1.86562e-07	178.929	0	326.008	1.57257	95.0688	0	F7
ENSMUSG00000003974	-8.47464	0.00546595	0.0233471	75.9094	0	41.9942	0	0	0	Grm3
ENSMUSG00000000889	-8.47295	0.00146502	0.00810232	84.0425	0	32.0482	0	1.86409	0	Dbh
ENSMUSG00000083339	-8.47291	0.00555807	0.0236524	81.3315	0	36.4687	0	0	0	Gm11693
ENSMUSG00000057817	-8.47265	0.000918385	0.00564168	16.2663	0	13.2613	0	87.6124	0	Olfr1446
ENSMUSG00000085295	-8.471	1.13644e-07	4.55992e-06	100.309	1.37201	274.068	0	75.4958	0	4930430E12Rik
ENSMUSG00000030491	-8.46963	0.000677205	0.00444608	211.462	0	17.6818	0.524192	0	0	Tdrd12
ENSMUSG00000050666	-8.46937	0.00089148	0.00552079	75.9094	0	34.2585	0	7.45638	0	Vstm4
ENSMUSG00000030344	-8.469	0.00143207	0.00795269	75.9094	0	39.784	0	1.86409	0	Akap3
ENSMUSG00000085940	-8.46899	0.000775193	0.00494425	81.3315	0	17.6818	0	18.6409	0	4930405D11Rik
ENSMUSG00000004894	-8.46787	3.08711e-05	0.000402333	140.975	0	78.4629	0	9.32047	0.597985	Hapln2
ENSMUSG00000108507	-8.46696	0.00561619	0.0238499	78.6204	0	38.6789	0	0	0	6720469O03Rik
ENSMUSG00000057716	-8.46689	4.96892e-06	9.33556e-05	384.969	1.37201	67.4118	0	5.59228	0	Tmem178b
ENSMUSG00000021919	-8.46599	0.000692175	0.00452469	73.1983	0	19.892	0	24.2332	0	Chat
ENSMUSG00000082567	-8.46522	0.0057261	0.0242325	84.0425	0	33.1533	0	0	0	Gm14896
ENSMUSG00000090159	-8.46522	0.0057261	0.0242325	84.0425	0	33.1533	0	0	0	Gm8580
ENSMUSG00000048764	-8.46506	0.00142215	0.00791443	67.7762	0	47.5198	0	1.86409	0	Tmprss11f
ENSMUSG00000098138	-8.46446	0.000458172	0.00330118	89.4646	0	138.139	0.524192	0	0	Gm9081
ENSMUSG00000085044	-8.46274	0.00560618	0.023824	70.4873	0	46.4147	0	0	0	1700109G15Rik
ENSMUSG00000091358	-8.46242	1.46607e-06	3.56071e-05	398.524	0	183.449	1.57257	2.79614	0	Speer5-ps1
ENSMUSG00000045631	-8.45994	0.000745294	0.00480536	73.1983	0	28.7329	0	14.9128	0	Tmprss12
ENSMUSG00000033024	-8.45959	0.00184068	0.00966843	70.4873	0	45.3096	0	0.932047	0	Klra9
ENSMUSG00000027239	-8.45635	0.000994216	0.00600094	48.7989	0	61.8862	0	5.59228	0	Mdk
ENSMUSG00000110670	-8.45547	0.000882086	0.00547741	70.4873	0	37.5738	0	8.38842	0	Gm30132
ENSMUSG00000074346	-8.45494	0.00128894	0.00735843	70.4873	0	43.0993	0	2.79614	0	Kcnd3os
ENSMUSG00000103538	-8.45322	0.00583835	0.0246053	78.6204	0	37.5738	0	0	0	Olfr289-ps1
ENSMUSG00000049028	-8.45194	0.000620326	0.00414387	56.932	0	32.0482	0	27.0294	0	Olfr873
ENSMUSG00000038421	-8.45114	0.00634396	0.0264358	21.6884	0	93.9345	0	0	0	Fcrla
ENSMUSG00000091248	-8.45075	0.00576731	0.0243507	65.0652	0	50.8351	0	0	0	Gm17689
ENSMUSG00000107490	-8.45075	0.00576731	0.0243507	65.0652	0	50.8351	0	0	0	Gm44058
ENSMUSG00000025916	-8.4507	0.00121041	0.00700386	75.9094	0	36.4687	0	3.72819	0	Ppp1r42
ENSMUSG00000081548	-8.44603	0.000614102	0.00411478	48.7989	0	38.6789	0	27.9614	0	Gm11692
ENSMUSG00000085264	-8.44579	0.00065084	0.00430381	54.221	0	22.1022	0	39.146	0	Gm15581
ENSMUSG00000079031	-8.44576	0.00105281	0.00627003	84.0425	0	24.3125	0	7.45638	0	BB287469
ENSMUSG00000081917	-8.44272	0.000511855	0.00359915	157.241	0.686007	67.4118	0	0	0	Gm15209
ENSMUSG00000106749	-8.44225	0.00593057	0.0249538	48.7989	0	66.3067	0	0	0	Gm43281
ENSMUSG00000109091	-8.44141	0.00157809	0.00856899	75.9094	0	37.5738	0	1.86409	0	Gm44827
ENSMUSG00000004347	-8.44033	3.29058e-12	6.93556e-10	653.363	1.37201	355.846	0	65.2433	1.79396	Pde1c
ENSMUSG00000026532	-8.43943	7.06357e-10	7.03938e-08	645.23	0.686007	89.514	1.57257	69.9035	0	Spta1
ENSMUSG00000106005	-8.4381	2.71224e-05	0.000360394	168.085	0	26.5227	0	29.8255	0.597985	Gm29151
ENSMUSG00000072845	-8.43704	0.000103157	0.00104773	149.108	0.686007	72.9374	0	1.86409	0	Tmprss11a
ENSMUSG00000109981	-8.43531	0.00096557	0.00586086	65.0652	0	7.73578	0	41.9421	0	Gm36849
ENSMUSG00000107970	-8.43465	0.00114367	0.00670795	84.0425	0	6.63067	0	24.2332	0	AC132412.1
ENSMUSG00000076439	-8.43409	0.000104351	0.00105659	192.484	0	27.6278	0.524192	3.72819	0	Mog
ENSMUSG00000055942	-8.43327	0.00613733	0.0257293	75.9094	0	38.6789	0	0	0	Obox7
ENSMUSG00000066687	-8.43023	6.01468e-08	2.72324e-06	225.017	0	66.3067	0.524192	111.846	0.597985	Zbtb16
ENSMUSG00000084775	-8.42854	2.70732e-08	1.4184e-06	287.371	0	255.281	1.57257	35.4178	0	Gm16741
ENSMUSG00000092399	-8.42716	0.00621021	0.0259755	73.1983	0	40.8891	0	0	0	4930556N13Rik
ENSMUSG00000080956	-8.4266	0.00056601	0.00387852	168.085	0	54.1505	0.524192	0	0	Gm16179
ENSMUSG00000102951	-8.42647	0.00615592	0.0257896	54.221	0	59.676	0	0	0	Gm37216
ENSMUSG00000111852	-8.42477	0.000761892	0.00488495	65.0652	0	26.5227	0	22.3691	0	Gm33180
ENSMUSG00000021620	-8.42304	7.10111e-05	0.000773696	165.374	0	51.9402	0.524192	4.66024	0	Acot12
ENSMUSG00000103168	-8.42284	0.00622255	0.0260122	65.0652	0	48.6249	0	0	0	Gm30948
ENSMUSG00000045333	-8.42253	0.00112974	0.00664187	46.0878	0	61.8862	0	5.59228	0	Zfp423
ENSMUSG00000084262	-8.42216	0.00627637	0.0262044	46.0878	0	67.4118	0	0	0	Olfr588-ps1
ENSMUSG00000039552	-8.42102	0.00628919	0.026252	70.4873	0	43.0993	0	0	0	Rsph4a
ENSMUSG00000048400	-8.42078	0.000621072	0.00414734	181.64	0.686007	39.784	0	0	0	Prss54
ENSMUSG00000102323	-8.41987	2.95754e-08	1.53199e-06	591.009	1.37201	418.837	1.57257	1.86409	0	Gm37790
ENSMUSG00000108876	-8.41762	0.00208829	0.0107083	51.5099	0	60.7811	0	0.932047	0	Gm44692
ENSMUSG00000097623	-8.41669	0.00631686	0.0263574	62.3541	0	50.8351	0	0	0	B230323A14Rik
ENSMUSG00000095139	-8.41645	1.18187e-06	3.00167e-05	347.014	1.37201	65.2016	0	27.0294	0	Pou3f2
ENSMUSG00000023868	-8.41605	5.15578e-07	1.51996e-05	452.745	0	154.716	0	7.45638	1.79396	Pde10a
ENSMUSG00000096277	-8.41326	0.00167886	0.00900943	56.932	0	54.1505	0	1.86409	0	Gm21142
ENSMUSG00000090200	-8.41167	0.00660283	0.0273326	35.2436	0	77.3578	0	0	0	1700025N21Rik
ENSMUSG00000027022	-8.41096	0.00147693	0.00815002	56.932	0	53.0454	0	2.79614	0	Xirp2
ENSMUSG00000025427	-8.41068	4.4476e-06	8.52201e-05	314.482	0	50.8351	1.04838	16.7768	0	Rnf165
ENSMUSG00000091669	-8.40854	0.000881855	0.00547741	70.4873	0	19.892	0	22.3691	0	Gm17117
ENSMUSG00000035352	-8.40662	3.05222e-11	5.04221e-09	86.7536	0	598.97	3.14515	434.334	0	Ccl12
ENSMUSG00000054320	-8.40388	5.64025e-05	0.000641174	124.708	0	88.4089	0	5.59228	0.597985	Lrrc36
ENSMUSG00000107491	-8.40179	0.00664778	0.0274798	43.3768	0	68.5169	0	0	0	Gm17893
ENSMUSG00000081851	-8.40062	0.00662502	0.0274104	67.7762	0	44.2045	0	0	0	Gm13323
ENSMUSG00000028519	-8.39923	9.02164e-05	0.000945313	130.13	0.686007	85.0936	0	2.79614	0	Dab1
ENSMUSG00000098678	-8.39899	0.0017596	0.00931997	56.932	0	53.0454	0	1.86409	0	Mroh6
ENSMUSG00000096436	-8.39713	0.00116015	0.00677746	75.9094	0	27.6278	0	8.38842	0	Olfr1437
ENSMUSG00000098194	-8.39623	0.00666319	0.0275373	59.6431	0	51.9402	0	0	0	Gm7286
ENSMUSG00000097160	-8.39253	0.00679706	0.0280211	70.4873	0	40.8891	0	0	0	A630072L19Rik
ENSMUSG00000103856	-8.38945	0.000902093	0.00557334	46.0878	0	15.4716	0	49.3985	0	Gm2474
ENSMUSG00000037989	-8.3881	7.39479e-07	2.03907e-05	319.904	1.37201	69.622	0	40.078	0	Wnk2
ENSMUSG00000093650	-8.38757	0.000903028	0.00557724	54.221	0	40.8891	0	15.8448	0	Gm20631
ENSMUSG00000086181	-8.38499	0.00125885	0.0072294	75.9094	0	27.6278	0	7.45638	0	C230034O21Rik
[truncated: 2,944 more rows]
