# Supplementary material
Source: Research Square preprint supplement (doi:10.21203/rs.3.rs-8980750/v1)
Supplement: Supplementary file 2 [file 59c13321bb570ef5ccd5163a.xlsx]

## Sheet: Sheet1
PDX Tumor Number	Date Generated	Passage	Age at Consent	Gender	Ethnic Category	Racial Category	What location did the PDTX tissue come from?	Is the tissue sample from the primary tumor or a metastatic site?	Histology	Primary Tumor (T)	Regional Lymph Nodes (N)	Distant Metastasis (M)	p53 status	Did the patient receive chemotherapy or treatment (prior to acquisition of tissue specimen)?	Did the patient receive radiation therapy (prior to acquisition of tissue specimen)?	Is the patient alive?	Mutations detected
PANC-193	2017-04-11	F3	73	Male	Not Hispanic or Latino	White	pancreas	primary	moderately differentiated	T3	N0	M0	p53 wild-type	No	No	No	CMOCO: KRAS - Lys180del - TTTC/T KRAS - Gln61His - T/G
PANC-266	2017-08-09	F5	46	Male	Not Hispanic or Latino	White	pancreas	primary	moderately differentiated	T3	N1	M0	p53 wild-type	No	No	No	multifocal adenocarcinoma CMOCO: KRAS - Gly12Arg - C/G SMAD4 - Trp524Cys - G/C
PANC-268	2017-06-28	F4	67	Male	Not Hispanic or Latino	White	pancreas	primary	moderately differentiated	T3	N2	M1	p53 mutant	Yes	No	No	CMOCO: ABL1 - Arg239His - G/A APC - Gln1328Arg - A/G APC - Pro1594AlafsTer38 - C/CA APC - Lys2248Ter - A/T GNAS - Arg201His - G/A KRAS - Gly12Asp - C/T MLH1 - Ala436Val - C/T STK11 - Lys84del - CAAG/C TP53- Arg267Gln - C/T TP53 - Gly244Cys - C/A
PANC-272	2017-07-05	F6	71	Female	Not Hispanic or Latino	White	pancreas	primary	moderately differentiated	T3	N2	M0	p53 wild-type	No	No	No	CMOCO: no variants detected
