# Supplementary material
Source: Research Square preprint supplement (doi:10.21203/rs.3.rs-8980750/v1)
Supplement: Supplementary file 3 [file 60a60987a6cdf5be094e779c.xlsx]

## Sheet: Materials
Bacterial strains	Supplier	cat #
NEB Stbl	New england biolabs	C3040H
Biological Samples
human PDAC Tissue microarray	BioMax	PA484a
Chemicals, peptides, recombinant proteins
Pancreacult	Stem Cell Technologies	6040
Tryple	Gibco	12605010
collagenase IV	Stem Cell Technologies	7909
Dispase	Stem Cell Technologies	7923
Dnase I	Stem Cell Technologies	07469,
Rnase-Free Dnase I	Thermo Scientific	EN0521
Primocin	InvivoGen	ANTPM1
DAPI	Invitrogen	D1306
Zombie Aqua viability stain	Biolegend	423101
Zombie NIR viability stain	Biolegend	423105
D-luciferin	Syd labs	MB000102-R70170
Carprofen	TCI america	C27011G
Gemcitabine		461060050
Cyclophosphamide	Thermo Scientific	AC203960010
recombinant mIL2	R&D systems	402ML020
recombinant hIL7	Stem Cell Technologies	78053.1
recombinant hIL15	Stem Cell Technologies	78031.1
Non-essential amino acids 100x	Cytivia	SH3023801
Sodium Pryuvate	Corning	MT25000CI
HEPES	Corning	25-060-CI
Growth factor reduced matrigel	Corning	CB-40230
Trizol	Invitrogen	15596018
RNAi Max	Thermo Scientific	13778150
eFluor 660 proliferation dye	Invitrogen	65-0864-14
prolong gold antifade mounting media	Invitrogen	P10144
Fugene HD	Promega	E2311
Paraformaldehyde 4%	Thermo Scientific	J19943.K2
Antigen retrieval solution	Invitrogen	00-4956-58
Poly-L-lysine	Advanced biomatrix	5048
5X LDS loading buffer	Thermo Scientific	84788
West Femto substrate	Thermo Scientific	34094
Super Frost Plus slides	Fisher brand	12-550-15
Blaticidin	InvivoGen	ant-bl-05
Puromycin	InvivoGen	A1113802
Doxycyline	Sigma Aldrich	D9891
Doxycyline chow	Bio-Serv	14-727-450
Restriction Enzymes
EcoRI-HF	New england biolabs	R3101S
SalI-HF	New england biolabs	R0138S
BamHI-HF	New england biolabs	R3136S
XbaI	New england biolabs	R0145S
DraIII-HF	New england biolabs	R3510S
AgeI-HF	New england biolabs	R3552S
NotI	New england biolabs	R0189S
KpnI-HF	New england biolabs	R3142S
BlpI	New england biolabs	R0585S
MluI	New england biolabs	R3198
NEB cutsmart buffer	New england biolabs	B6004S
Commercial Kits/ Assays
Direct-zol RNA mini	Zymo	R2050
Direct-zol RNA micro	Zymo	R2060
Zymo plasmid midiprep	Zymo	D4201
BioRadiscript cDNA synthesis	BioRad	1708891
Power up SYBR Green PCR master mix	Applied Biosystems	A25743
Dream Taq green master mix	Thermo Scientific	FERK1082
Pierce Rapid gold BCA protein assay	Thermo Scientific	A55861
Mojo sort CD3 T-cell isolation kit	Biolegned	480024
Monarch NEB gel extraction kit	New England Biolabs	T1120S
NEB HIFI Assembly master mix	New England Biolabs	E2621S

## Sheet: Antibodies 
	Target	Conjugate	Supplier	Cat #	Clone	Dilution	Vadlidation
	Rabbit anti-GFP	none	Cell signaling Technologies	2956S	D5.1	(1:100, IF)	Rabbit anti-GFP: https://www.cellsignal.com/products/primary-antibodies/gfp-d5-1-rabbit-monoclonal-antibody/2956
	Rat anti-mCherry	Alexa Fluor 555	Invitrogen	M11246	16D7	(1:100, IF)	Rat anti -mCherry: https://www.thermofisher.com/antibody/product/mCherry-Antibody-clone-16D7-Recombinant-Monoclonal/740003TP55520UG
	Rabbit anti-Ki67	Alexa Fluor 647	Cell signaling Technologies	12075S	D3B5	(1:100, IF)	Rabbit anti-Ki67: https://www.cellsignal.com/products/antibody-conjugates/ki-67-d3b5-rabbit-monoclonal-antibody-alexa-fluor-647-conjugate/12075
	anti-mouse EREG	none	Santa Cruz Biotech	SC-376284	C-9	(1:50 IF, 1:1000 WB)	anti-mouse EREG:https://www.scbt.com/p/epiregulin-antibody-c-9
	Rabbit anti-Beta-Actin	non	Cell signaling Technologies	12620S	D6A8	(1:1000) WB	Rabbit anti-Beta-Actin: https://www.cellsignal.com/products/primary-antibodies/beta-actin-antibody/4967
	Mouse anti-Pan-Cytokeratin	Alexa Fluor 555	Cell signaling Technologies	3478S	C11	(1:800 Flow; 1:1000 IF)	Mouse anti-Pan-Cytokeratin: https://www.cellsignal.com/products/antibody-conjugates/pan-keratin-c11-mouse-monoclonal-antibody-alexa-fluor-555-conjugate/3478
	Mouse anti-p27	None	Cell signaling Technologies	3698s	SX53G8.5	(1:50 IF)	Mouse anti-p27: https://www.cellsignal.com/products/primary-antibodies/p27-kip1-sx53g8-5-mouse-monoclonal-antibody/3698
	Mouse Lineage cocktail	Alexa Fluor 700	Biolegend	133313	17A2; RB6-8C5; RA3-6B2; Ter-119; M1/70	5 ul per RXN	Mouse lineage cocktail: https://www.biolegend.com/en-us/products/alexa-fluor-700-anti-mouse-lineage-cocktail-with-isotype-ctrl-8122
	Rabbit anti-p-H2AX	none	Cell signaling Technologies	9718	20000	(1:100 Flow)	Rabbit anti-p-H2AX: https://www.cellsignal.com/products/primary-antibodies/phospho-histone-h2a-x-ser139-20e3-rabbit-monoclonal-antibody/9718
	Mouse anti-CD19	APC	Biolegend	115512	6D5	(10 ul per RXN, Flow)	Anti-mouse CD19: https://www.biolegend.com/en-us/products/apc-anti-mouse-cd19-antibody-1526
	anti-human CD45	FITC	Biolegend	304006	clone: HI30	(2.5 ul per RXN, Flow)	anti-human CD45: https://www.biolegend.com/en-us/products/fitc-anti-human-cd45-antibody-707
	anti-mouse CD45	APC	Biolegend	103112	30-F11	(2.5 ul per RXN, Flow)	anti-mouse CD45 https://www.biolegend.com/en-us/products/apc-anti-mouse-cd45-antibody-97
	anti-mouse/human Cd11b	Pacific Blue	Biolegend	101224	M1/70	(2.5 ul per RXN, Flow)	anti-mouse/human CD11b: https://www.biolegend.com/en-us/products/pacific-blue-anti-mouse-human-cd11b-antibody-3863
	Mouse anti-Erbb4	Alexa Fluor 647	Santa Cruz Biotech	SC-8050	C-7	(2.5 ul per RXN, Flow)	anti-mouse Erbb4: https://www.scbt.com/p/erbb-4-antibody-c-7
	Rabbit anti-p27	PE	Cell signaling Technologies	12184	D69C12	(1:50, Flow)	Rabbit anti-p27: https://www.cellsignal.com/products/antibody-conjugates/p27-kip1-d69c12-rabbit-monoclonal-antibody-pe-conjugate/12184
	anti-mouse Epcam	PE	Invitrogen	12-5791-81	G8.8	(1:100, Flow)	Anti-mouse EpCAM: https://www.thermofisher.com/antibody/product/CD326-EpCAM-Antibody-clone-G8-8-Monoclonal/12-5791-82
	anti-mouse F4/80	APC Fire/Alexafluor 750	Biolegend	123152	BM8	2.5 ul per RXN	anti-mouse F4/80: https://www.biolegend.com/en-us/products/apc-fire-750-anti-mouse-f4-80-antibody-13197
	anti-mouse IFNγ	APC	Biolegend	505810	XMG1.2	2.5 ul per RXN	anti-mouse IFNγ: https://www.biolegend.com/en-us/products/apc-anti-mouse-ifn-gamma-antibody-993
	anti-mouse TNFa	PE/Cy7	Biolegend	506323	MP6-XT22	2.5 ul per RXN	anti-mouse TNFa: https://www.biolegend.com/en-us/products/pe-cyanine7-anti-mouse-tnf-alpha-antibody-5866
	anti-mouse Granzyme-B	APC	Invitrogen	17889880	NGZB	(1:100, IF)	anti-mouse Granzyme B: https://www.thermofisher.com/antibody/product/Granzyme-B-Antibody-clone-NGZB-Monoclonal/17-8898-82
	anti-mouse CD3	Alexa Fluor 700	Invitrogen	56003282	17A2	(1:100, IF)	anti-mouse CD3: https://www.thermofisher.com/antibody/product/CD3-Antibody-clone-17A2-Monoclonal/56-0032-82
	anti-human Epcam	PE/Cy7	Biolegend	324222	9C4	(2.5ul per RXN, Flow)	anti-human EpCAM: https://www.biolegend.com/en-us/products/pe-cyanine7-anti-human-cd326-epcam-antibody-8107
	Rabbit anti-Cleaved-caspase 3	Alexa Fluor 647	Cell signaling Technologies	9602S	D3E9	(1:50, Flow)	Rabbit anti-claved caspase 3: https://www.cellsignal.com/products/antibody-conjugates/cleaved-caspase-3-asp175-d3e9-rabbit-monoclonal-antibody-alexa-fluor-647-conjugate/9602
	Rabbit anti-Cleaved-caspase 3	none	Cell signaling Technologies	9661t	D175	(1:400, IF)	Rabbit anti-cleaved caspase 3: https://www.cellsignal.com/products/primary-antibodies/cleaved-caspase-3-asp175-antibody/9661
	Rat anti-GFP	Alexa Fluor 488	Biolegend	338007	FM2264G	(1:50, IF); (2.5ul per RXN, Flow)	Rat anti-GFP: https://www.biolegend.com/en-us/products/alexa-fluor-488-anti-gfp-antibody-9584
	Rabbit anti-HER4/ErBb4	None	Cell signaling Technologies	4796	111B2	(1:100, IF)	https://www.cellsignal.com/products/primary-antibodies/her4-erbb4-111b2-rabbit-monoclonal-antibody/4795
	Mouse anti-human CD14	FITC	Miltenyi	130113153	TUK4	(1:50 MACS)	https://www.miltenyibiotec.com/US-en/products/cd14-antibody-anti-human-tuk4.html#conjugate=fitc:size=100-tests-in-200-ul
	Rabbit anti-G4S linker	Alexa Fluor 647	Cell signaling Technologies	69782	E7O2V	(1:50, Flow)	https://www.cellsignal.com/products/antibody-conjugates/g4s-linker-e7o2v-rabbit-monoclonal-antibody-alexa-fluor-647-conjugate/69782
	anti-human CD44	APC	Biolegend	338806	BJ18	(2.5ul per RXN, Flow)	https://www.biolegend.com/en-gb/products/apc-anti-human-cd44-antibody-5583
	anti-human CD24	PE	BD Biosciences	560991	ML5	(10ul per RXN, Flow)	https://www.bdbiosciences.com/en-us/products/reagents/flow-cytometry-reagents/research-reagents/single-color-antibodies-ruo/pe-mouse-anti-human-cd24.560991?tab=product_details
	anti-mouse CD8a	BV421	Biolegend	100737	53-6.7	(2.5 ul per RXN, Flow)	anti-mouse CD8a: https://www.biolegend.com/en-us/products/brilliant-violet-421-anti-mouse-cd8a-antibody-7138
	Secondary Antibodies
	Goat anti-Rabbit IgG-HRP linked	HRP	Cell Signaling Technologies	7074		(1:3000)	anti-rabbit IgG-HRP: https://www.cellsignal.com/products/secondary-antibodies/anti-rabbit-igg-hrp-linked-antibody/7074
	Goat anti-mouse IgG HRP linked	HRP	Cell Signaling Technologies	7076		(1:3000)	anti-mouse IgG-HRP: https://www.cellsignal.com/products/secondary-antibodies/anti-mouse-igg-hrp-linked-antibody/7076
	Goat anti-Rabbit IgG Alexa fluor 647	Alexa Fluor 647	Cell Signaling Technologies	4414		(1:500)	anti-rabbit IgG Alexa Fluor 647: https://www.cellsignal.com/products/secondary-antibodies/anti-rabbit-igg-h-l-f-ab-2-fragment-alexa-fluor-647-conjugate/4414
	Goat anti-Rabbit IgG Alexa Fluor 488	Alexa Fluor 488	Cell Signaling Technologies	4412		(1:500)	anti-rabbit IgG Alexa Fluor 488: https://www.cellsignal.com/products/secondary-antibodies/anti-rabbit-igg-h-l-f-ab-2-fragment-alexa-fluor-488-conjugate/4412
	Goat anti-mouse IgG Alexa Fluor 488	Alexa Fluor 488	Cell Signaling Technologies	4408		(1:500)	Anti-mouse IgG Alexa Fluor 488https://www.cellsignal.com/products/secondary-antibodies/anti-mouse-igg-h-l-f-ab-2-fragment-alexa-fluor-488-conjugate/4408
	Goat anti-mouse IgG Alexa Fluor 647	Alexa Fluor 647	Cell Signaling Technologies	4410		(1:500)	Anti-mouse IgG Alexa Fluor 647: https://www.cellsignal.com/products/secondary-antibodies/anti-mouse-igg-h-l-f-ab-2-fragment-alexa-fluor-647-conjugate/4410
